# Supplementary material for: Postdiagnosis recreational physical activity and breast cancer prognosis: Global Cancer Update Programme (CUP Global) systematic literature review and meta‐analysis
Source: PubMed Central journal article supplement — Int J Cancer. 2022 Oct 24;152(4):600–15. doi: 10.1002/ijc.34324 (PMC10091720; doi:10.1002/ijc.34324), 2022-10-24
Supplement: IJC-152-600-s001.pdf [file IJC-152-600-s001.pdf]

## Supplementary Material

### **Post-diagnosis recreational physical activity and breast cancer prognosis: Global Cancer Update Programme (CUP Global) systematic literature review and meta-analysis.**

Margarita Cariolou<sup>1</sup>, Leila Abar<sup>1</sup>, Dagfinn Aune<sup>1,2,3,4</sup>, Katia Balducci<sup>1</sup>, Nerea Becerra-Tomás<sup>1</sup>, Darren C. Greenwood<sup>5</sup>, Georgios Markozannes<sup>1,6</sup>, Neesha Nanu<sup>1</sup>, Ana-Rita Vieira<sup>1</sup>, Edward L Giovannucci<sup>7,8,9</sup>, Marc J Gunter<sup>10</sup>, Alan A Jackson<sup>11,12</sup>, Ellen Kampman<sup>13</sup>, Vivien Lund<sup>14</sup>, Kate Allen<sup>14</sup>, Nigel T Brockton<sup>15</sup>, Helen Croker<sup>14</sup>, Daphne Katsikioti<sup>14</sup>, Deirdre McGinley-Gieser<sup>15</sup>, Panagiota Mitrou<sup>14</sup>, Martin Wiseman<sup>14</sup>, Amanda J Cross<sup>1</sup>, Elio Riboli<sup>1</sup>, Steven K Clinton<sup>16</sup>, Anne McTiernan<sup>17</sup>, Teresa Norat<sup>1,14</sup>, Konstantinos K Tsilidis<sup>1,6\*</sup>, Doris S M Chan<sup>1\*</sup>

#### **Table of contents**

|                                                                                                                                                                     |    |
|---------------------------------------------------------------------------------------------------------------------------------------------------------------------|----|
| Supplementary Tables .....                                                                                                                                          | 4  |
| Supplementary Table 1 PRISMA Checklist 2009.....                                                                                                                    | 4  |
| Supplementary Table 2A Search terms used for PubMed .....                                                                                                           | 6  |
| Supplementary Table 2B Search terms used for OVID Embase.....                                                                                                       | 8  |
| Supplementary Table 3 Grading Criteria for evidence on diet, nutrition, physical activity and survival in women with breast cancer .....                            | 13 |
| Supplementary table 4 Physical activity definition in observational studies included in the review .....                                                            | 14 |
| Supplementary Table 5A Descriptive table of studies included in analyses of total physical activity after diagnosis and breast cancer prognosis .....               | 17 |
| Supplementary Table 5B Descriptive table of studies included in analyses of recreational physical activity after diagnosis and breast cancer prognosis.....         | 19 |
| Supplementary Table 6 Descriptive table of follow-up observational analyses of patients enrolled in clinical trials of exercise after breast cancer diagnosis ..... | 40 |
| Supplementary Table 7 Hazard ratios (95% CI) for non-linear analysis of recreational physical activity after diagnosis and breast cancer prognosis outcomes .....   | 45 |
| Supplementary Table 8 Summary of the judgement of the WCRF Expert Panel .....                                                                                       | 46 |
| Supplementary Figures .....                                                                                                                                         | 47 |

|                                                                                                                                                                                                                                                                                                                                                                                                                                                                                                                                                |    |
|------------------------------------------------------------------------------------------------------------------------------------------------------------------------------------------------------------------------------------------------------------------------------------------------------------------------------------------------------------------------------------------------------------------------------------------------------------------------------------------------------------------------------------------------|----|
| Supplementary Figure 1 Summary hazard ratio (95% CI) of all-cause mortality, breast cancer-specific mortality and recurrence for the highest compared with the lowest level of total physical activity after diagnosis. ....                                                                                                                                                                                                                                                                                                                   | 47 |
| Supplementary Figure 2 Effects of exercise during and after adjuvant treatment on breast cancer outcomes – follow-up observational analyses of patients enrolled in clinical trials (no pooling). ....                                                                                                                                                                                                                                                                                                                                         | 47 |
| Supplementary Figure 3 Funnel plot of studies included in the dose-response analysis for recreational physical activity and all-cause mortality. ....                                                                                                                                                                                                                                                                                                                                                                                          | 48 |
| Supplementary Figure 4 Funnel plot of studies included in the high versus low analysis for recreational physical activity and all-cause mortality. ....                                                                                                                                                                                                                                                                                                                                                                                        | 48 |
| Supplementary Figure 5 Sensitivity (leave-one-out) analysis for (A) high versus low recreational physical activity and all-cause mortality and (B) .....                                                                                                                                                                                                                                                                                                                                                                                       | 50 |
| Supplementary Figure 6 Summary hazard ratio estimate (95% CI) of all-cause mortality for 10 MET-h/week of recreational physical activity after diagnosis in women with hormone receptor positive tumours. Note: ABCPP (Nechuta) included data from three US cohort studies i.e., LACE, NHS, WHEL. ....                                                                                                                                                                                                                                         | 51 |
| Supplementary Figure 7 Summary hazard ratio estimate (95% CI) of all-cause cancer mortality for the highest compared with the lowest level of recreational physical activity after diagnosis, by hormone receptor status. Note: ABCPP (Nechuta) included data from three US cohort studies i.e., LACE, NHS, WHEL. ....                                                                                                                                                                                                                         | 51 |
| Supplementary Figure 8 Summary hazard ratio estimate (95% CI) of all-cause mortality for 10 MET-h/week of recreational physical activity after diagnosis, by menopausal status. ....                                                                                                                                                                                                                                                                                                                                                           | 52 |
| Supplementary Figure 9 Summary hazard ratio estimate (95% CI) of all-cause mortality for the highest compared with the lowest level of recreational physical activity after diagnosis, by menopausal status. ....                                                                                                                                                                                                                                                                                                                              | 52 |
| Supplementary Figure 10 Summary hazard ratio estimate (95% CI) of all-cause mortality for the highest compared with the lowest level of recreational physical activity after diagnosis, by BMI subgroup. ....                                                                                                                                                                                                                                                                                                                                  | 53 |
| Supplementary Figure 11 Summary hazard ratio estimate (95% CI) of all-cause mortality for the highest compared with the lowest level of moderate and vigorous physical activity after diagnosis. ....                                                                                                                                                                                                                                                                                                                                          | 54 |
| Supplementary Figure 12 Summary hazard ratio estimate (95% CI) of (A) all-cause mortality for 10 MET-h/week of recreational physical activity, in analysis restricted to studies that collected information after the primary treatment for cancer was finished and (B) summary hazard ratio estimate (95% CI) of all-cause mortality for the highest compared with the lowest level of recreational physical activity, in analysis restricted to studies that collected information after the primary treatment for cancer was finished. .... | 55 |
| Supplementary Figure 13 Funnel plot of studies included in the high versus low meta-analysis for recreational physical activity and breast cancer-specific mortality. ....                                                                                                                                                                                                                                                                                                                                                                     | 56 |

|                                                                                                                                                                                                                                                                                                                                                                                                                                                                                                                                                                |    |
|----------------------------------------------------------------------------------------------------------------------------------------------------------------------------------------------------------------------------------------------------------------------------------------------------------------------------------------------------------------------------------------------------------------------------------------------------------------------------------------------------------------------------------------------------------------|----|
| Supplementary Figure 14 Sensitivity (leave-one-out) analysis for (A) high versus low recreational physical activity and all-cause mortality and (B) dose-response meta-analysis for breast cancer-specific mortality .....                                                                                                                                                                                                                                                                                                                                     | 57 |
| Supplementary Figure 15 Summary hazard ratio estimate (95% CI) of breast cancer-specific mortality for 10 MET-h/week of recreational physical activity after diagnosis, by menopausal status. ....                                                                                                                                                                                                                                                                                                                                                             | 58 |
| Supplementary Figure 16 Summary hazard ratio estimate (95% CI) of breast cancer-specific mortality for the highest compared with the lowest level of recreational physical activity after diagnosis, by menopausal status. ....                                                                                                                                                                                                                                                                                                                                | 58 |
| Supplementary Figure 17 Summary hazard ratio estimate (95% CI) of breast cancer-specific mortality for the highest compared with the lowest level of recreational physical activity after diagnosis, by BMI subgroup. ....                                                                                                                                                                                                                                                                                                                                     | 59 |
| Supplementary Figure 18 Summary hazard ratio estimate (95% CI) of breast cancer-specific mortality for the highest compared with the lowest level of moderate and vigorous physical activity after diagnosis. ....                                                                                                                                                                                                                                                                                                                                             | 60 |
| Supplementary Figure 19 Summary hazard ratio estimate (95% CI) of (A) breast cancer-specific mortality for 10 MET-h/week of recreational physical activity, in analysis restricted to studies that collected information after the primary treatment for cancer was finished and (B) summary hazard ratio estimate (95% CI) of breast cancer mortality for the highest compared with the lowest level of recreational physical activity, in analysis restricted to studies that collected information after the primary treatment for cancer was finished..... | 61 |
| APPENDIX 2.....                                                                                                                                                                                                                                                                                                                                                                                                                                                                                                                                                | 62 |
| Details for physical activity estimations for dose-response analyses .....                                                                                                                                                                                                                                                                                                                                                                                                                                                                                     | 62 |
| APPENDIX 3.....                                                                                                                                                                                                                                                                                                                                                                                                                                                                                                                                                | 62 |
| Physical activity changes from before to after diagnosis and breast cancer prognosis .....                                                                                                                                                                                                                                                                                                                                                                                                                                                                     | 62 |

## List of Abbreviations

**ABCPP**, After Breast Cancer Pooling Project; **BMI**, Body mass index; **CPS-II Nutrition Cohort**, Cancer Prevention Study-II Nutrition Cohort; **CWLS**, Collaborative Women's Longevity Study; **DCH**, Diet, Cancer, and Health cohort; **ER+**, Estrogen receptor positive; **ER-**, Estrogen receptor negative; **HR**, Hazard Ratio; **HEAL**, The Health, Eating, Activity, and Lifestyle Study; **LACE**, Life After Cancer Epidemiology study; **LIBCSP**, Long Island Breast Cancer Study; **MET**, Metabolic equivalent of task; **NOWAC**, Norwegian Women and Cancer study; **NRWHS**, The National Runners' and Walkers' Health Studies; **NHIS**, National Health Interview Survey; **NHS**, Nurses' Health Study; **PICOS**, participants, interventions, comparisons, outcomes, and study design; **PA**, physical activity; **PR+**, Progesterone receptor positive; **PR-**, Progesterone receptor negative; **RCT**, Randomised controlled trial; **SBCSS**, Shanghai Breast cancer Survival Study; **SD**, Standard deviation; **TEAM-L side study**, Tamoxifen Exemestane Adjuvant Multicenter Lifestyle side study; **WHI**, Women's Health Initiative; **WHEL**, The Women's Healthy Eating and Living Study; **WISC**, Wisconsin In Situ Cohort study; **USA** United States of America

## APPENDIX 1

### Supplementary Tables

| Supplementary Table 1 PRISMA Checklist 2009 |   |                                                                                                                                                                                                                                                                                                             |                    |
|---------------------------------------------|---|-------------------------------------------------------------------------------------------------------------------------------------------------------------------------------------------------------------------------------------------------------------------------------------------------------------|--------------------|
| Section/topic                               | # | Checklist item                                                                                                                                                                                                                                                                                              | Reported on page # |
| <b>TITLE</b>                                |   |                                                                                                                                                                                                                                                                                                             |                    |
| Title                                       | 1 | Identify the report as a systematic review, meta-analysis, or both.                                                                                                                                                                                                                                         | 1-2                |
| <b>ABSTRACT</b>                             |   |                                                                                                                                                                                                                                                                                                             |                    |
| Structured summary                          | 2 | Provide a structured summary including, as applicable: background; objectives; data sources; study eligibility criteria, participants, and interventions; study appraisal and synthesis methods; results; limitations; conclusions and implications of key findings; systematic review registration number. | 2                  |
| <b>INTRODUCTION</b>                         |   |                                                                                                                                                                                                                                                                                                             |                    |
| Rationale                                   | 3 | Describe the rationale for the review in the context of what is already known.                                                                                                                                                                                                                              | 3-4                |
| Objectives                                  | 4 | Provide an explicit statement of questions being addressed with reference to participants, interventions, comparisons, outcomes, and study design (PICOS).                                                                                                                                                  | 4-5                |
| <b>METHODS</b>                              |   |                                                                                                                                                                                                                                                                                                             |                    |
| Protocol and registration                   | 5 | Indicate if a review protocol exists, if and where it can be accessed (e.g., Web address), and, if available, provide registration information including registration number.                                                                                                                               | 4                  |

|                                    |    |                                                                                                                                                                                                                        |                        |
|------------------------------------|----|------------------------------------------------------------------------------------------------------------------------------------------------------------------------------------------------------------------------|------------------------|
| Eligibility criteria               | 6  | Specify study characteristics (e.g., PICOS, length of follow-up) and report characteristics (e.g., years considered, language, publication status) used as criteria for eligibility, giving rationale.                 | 4-5                    |
| Information sources                | 7  | Describe all information sources (e.g., databases with dates of coverage, contact with study authors to identify additional studies) in the search and date last searched.                                             | 4                      |
| Search                             | 8  | Present full electronic search strategy for at least one database, including any limits used, such that it could be repeated.                                                                                          | Supplementary Material |
| Study selection                    | 9  | State the process for selecting studies (i.e., screening, eligibility, included in systematic review, and, if applicable, included in the meta-analysis).                                                              | 4                      |
| Data collection process            | 10 | Describe method of data extraction from reports (e.g., piloted forms, independently, in duplicate) and any processes for obtaining and confirming data from investigators.                                             | 4-5                    |
| Data items                         | 11 | List and define all variables for which data were sought (e.g., PICOS, funding sources) and any assumptions and simplifications made.                                                                                  | 4                      |
| Risk of bias in individual studies | 12 | Describe methods used for assessing risk of bias of individual studies (including specification of whether this was done at the study or outcome level), and how this information is to be used in any data synthesis. | Narrative              |
| Summary measures                   | 13 | State the principal summary measures (e.g., risk ratio, difference in means).                                                                                                                                          | 5                      |
| Synthesis of results               | 14 | Describe the methods of handling data and combining results of studies, if done, including measures of consistency (e.g., $I^2$ ) for each meta-analysis.                                                              | 5-6                    |

From: Moher D, Liberati A, Tetzlaff J, Altman DG, The PRISMA Group (2009). Preferred Reporting Items for Systematic Reviews and Meta-Analyses: The PRISMA Statement. PLoS Med 6(6): e1000097. doi:10.1371/journal.pmed1000097 For more information, visit: [www.prisma-statement.org](http://www.prisma-statement.org).

### Supplementary Table 1 PRISMA Checklist 2009

| Section/topic               | #  | Checklist item                                                                                                                                                  | Reported on page #           |
|-----------------------------|----|-----------------------------------------------------------------------------------------------------------------------------------------------------------------|------------------------------|
| Risk of bias across studies | 15 | Specify any assessment of risk of bias that may affect the cumulative evidence (e.g., publication bias, selective reporting within studies).                    | 5 and supplementary material |
| Additional analyses         | 16 | Describe methods of additional analyses (e.g., sensitivity or subgroup analyses, meta-regression), if done, indicating which were pre-specified.                | 5-6                          |
| <b>RESULTS</b>              |    |                                                                                                                                                                 |                              |
| Study selection             | 17 | Give numbers of studies screened, assessed for eligibility, and included in the review, with reasons for exclusions at each stage, ideally with a flow diagram. | 7 and Figure 1               |
| Study characteristics       | 18 | For each study, present characteristics for which data were extracted (e.g., study size, PICOS, follow-up period) and provide                                   | 4-5                          |

|                               |    |                                                                                                                                                                                                          |                                                |
|-------------------------------|----|----------------------------------------------------------------------------------------------------------------------------------------------------------------------------------------------------------|------------------------------------------------|
|                               |    | the citations.                                                                                                                                                                                           |                                                |
| Risk of bias within studies   | 19 | Present data on risk of bias of each study and, if available, any outcome level assessment (see item 12).                                                                                                | Supplementary material/Narrative               |
| Results of individual studies | 20 | For all outcomes considered (benefits or harms), present, for each study: (a) simple summary data for each intervention group (b) effect estimates and confidence intervals, ideally with a forest plot. | 7-11 and Figures 2-4 and supplementary Figures |
| Synthesis of results          | 21 | Present results of each meta-analysis done, including confidence intervals and measures of consistency.                                                                                                  | 7-11 Figures 2-4 and supplementary Figures     |
| Risk of bias across studies   | 22 | Present results of any assessment of risk of bias across studies (see Item 15).                                                                                                                          | Supplementary material                         |
| Additional analysis           | 23 | Give results of additional analyses, if done (e.g., sensitivity or subgroup analyses, meta-regression [see Item 16]).                                                                                    | 6-11 and Supplementary Figures                 |
| <b>DISCUSSION</b>             |    |                                                                                                                                                                                                          |                                                |
| Summary of evidence           | 24 | Summarize the main findings including the strength of evidence for each main outcome; consider their relevance to key groups (e.g., healthcare providers, users, and policy makers).                     | 12-16                                          |
| Limitations                   | 25 | Discuss limitations at study and outcome level (e.g., risk of bias), and at review-level (e.g., incomplete retrieval of identified research, reporting bias).                                            | 12-16                                          |
| Conclusions                   | 26 | Provide a general interpretation of the results in the context of other evidence, and implications for future research.                                                                                  | 16                                             |
| <b>FUNDING</b>                |    |                                                                                                                                                                                                          |                                                |
| Funding                       | 27 | Describe sources of funding for the systematic review and other support (e.g., supply of data); role of funders for the systematic review.                                                               | 16                                             |

### Supplementary Table 2A Search terms used for PubMed

**Note:** The physical activity-related terms are indicated in bold

#### a. Searching for mortality, survival, recurrence, second cancer

1. Recurrence [MeSH Terms] OR "Neoplasm Recurrence, Local" [MeSH Terms] OR "Disease Progression"[MeSH Terms] OR "Disease-Free Survival"[MeSH Terms] OR Mortality[MeSH Terms] OR Mortality [Subheading] OR "Survival Analysis" [MeSH Terms] OR recurrence [tiab] OR recurrences [tiab] OR relapse [tiab] OR relapses [tiab] OR survivor [tiab] OR survivors [tiab] OR progression [tiab] OR survival [tiab] OR mortality [tiab] OR death [tiab] OR second cancer [tiab]

#### b. Searching for studies on breast cancer

(Search terms are those tested in the SLR for the WCRF Second Expert Report and the CUP)

2. Breast Neoplasms [MeSH Terms]

3. Breast AND (cancer\* OR neoplasm\* OR tumor\* OR tumor\* OR carcinoma\* OR adenocarcinoma\*)

4. mammary AND (cancer\* OR neoplasm\* OR tumor\* OR tumor\* OR carcinoma\* OR adenocarcinoma\*)

5. #2 OR #3 OR #4

**c. Search for all studies relating to diet, body fatness and physical activity**

6. diet therapy[MeSH Terms] OR nutrition[MeSH Terms]

7. diet[tiab] OR diets[tiab] OR dietetic[tiab] OR dietary[tiab] OR eating[tiab] OR intake[tiab] OR nutrient\*[tiab] OR nutrition[tiab] OR vegetarian\*[tiab] OR vegan\*[tiab] OR "seventh day adventist"[tiab] OR macrobiotic[tiab]

8. "food and beverages" [MeSH Terms]

9. food\*[tiab] OR cereal\*[tiab] OR grain\*[tiab] OR granary[tiab] OR

wholegrain[tiab] OR wholewheat[tiab] OR roots[tiab] OR plantain\*[tiab] OR tuber[tiab]

OR tubers[tiab] OR vegetable\*[tiab] OR fruit\*[tiab] OR pulses[tiab] OR beans[tiab] OR

lentils[tiab] OR chickpeas[tiab] OR legume\*[tiab] OR soy[tiab] OR soya[tiab] OR

nut[tiab] OR nuts[tiab] OR peanut\*[tiab] OR groundnut\*[tiab] OR (seeds[tiab] AND (diet\*[tiab] OR food\*[tiab])) OR

meat[tiab] OR beef[tiab] OR pork[tiab] OR lamb[tiab] OR poultry[tiab] OR chicken[tiab] OR turkey[tiab] OR

duck[tiab] OR (fish[tiab] AND (diet\*[tiab] OR food\*[tiab])) OR ((fat[tiab] OR fats[tiab] OR fatty[tiab]) AND (diet\*[tiab]

OR food\*[tiab] OR adipose[tiab] OR blood[tiab] OR serum[tiab] OR plasma[tiab])) OR egg[tiab] OR eggs[tiab] OR

bread[tiab] OR (oils[tiab] AND (diet\*[tiab] OR food\*[tiab] OR adipose[tiab] OR blood[tiab] OR serum[tiab] OR

plasma[tiab])) OR shellfish[tiab] OR seafood[tiab] OR sugar[tiab] OR syrup[tiab] OR dairy[tiab] OR milk[tiab] OR

herbs[tiab] OR spices[tiab] OR chilli[tiab] OR chillis[tiab] OR pepper\*[tiab] OR condiments[tiab] OR tomato\*[tiab]

10. fluid intake[tiab] OR water[tiab] OR drinks[tiab] OR drinking[tiab] OR tea[tiab] OR coffee[tiab] OR caffeine[tiab]

OR juice[tiab] OR beer[tiab] OR spirits[tiab] OR

liquor[tiab] OR wine[tiab] OR alcohol[tiab] OR alcoholic[tiab] OR beverage\*[tiab] OR

(ethanol[tiab] AND (drink\*[tiab] OR intake[tiab] OR consumption[tiab])) OR yerba mate[tiab] OR ilex

paraguariensis[tiab]

11. pesticides[MeSH Terms] OR fertilizers[MeSH Terms] OR "veterinary

drugs"[MeSH Terms]

12. pesticide\*[tiab] OR herbicide\*[tiab] OR DDT[tiab] OR fertiliser\*[tiab] OR

fertilizer\*[tiab] OR organic[tiab] OR contaminants[tiab] OR contaminate\*[tiab] OR

veterinary drug\*[tiab] OR polychlorinated dibenzofuran\*[tiab] OR PCDF\*[tiab] OR

polychlorinated dibenzodioxin\*[tiab] OR PCDD\*[tiab] OR polychlorinated

biphenyl\*[tiab] OR PCB\*[tiab] OR cadmium[tiab] OR arsenic[tiab] OR chlorinated

hydrocarbon\*[tiab] OR microbial contamination\*[tiab]

13. food preservation[MeSH Terms]

14. (mycotoxin\*[tiab] OR aflatoxin\*[tiab] OR pickled[tiab] OR bottled[tiab] OR bottling[tiab] OR canned[tiab] OR

canning[tiab] OR vacuum pack\*[tiab] OR refrigerate\*[tiab] OR refrigeration[tiab] OR cured[tiab] OR smoked[tiab]

OR preserved[tiab] OR preservatives[tiab] OR nitrosamine[tiab] OR hydrogenation[tiab] OR fortified[tiab] OR

additive\*[tiab] OR colouring\*[tiab] OR coloring\*[tiab] OR flavouring\*[tiab] OR flavoring\*[tiab] OR nitrates[tiab] OR

nitrites[tiab] OR solvent[tiab] OR solvents[tiab] OR ferment\*[tiab] OR processed[tiab] OR antioxidant\*[tiab] OR

genetic modif\*[tiab] OR genetically modif\*[tiab] OR vinyl chloride[tiab] OR packaging[tiab] OR labelling[tiab] OR

phthalates[tiab]) AND (diet\*[tiab] OR food\*[tiab] OR adipose[tiab] OR blood[tiab] OR serum[tiab] OR plasma[tiab])

15. cookery[MeSH Terms]

16. cooking[tiab] OR cooked[tiab] OR grill[tiab] OR grilled[tiab] OR fried[tiab] OR

fry[tiab] OR roast[tiab] OR bake[tiab] OR baked[tiab] OR stewing[tiab] OR stewed[tiab] OR casserol\*[tiab] OR

broil[tiab] OR broiled[tiab] OR boiled[tiab] OR ((microwave[tiab] OR microwaved[tiab] OR re-heating[tiab] OR

reheating[tiab] OR heating[tiab] OR re-heated[tiab] OR heated[tiab]) AND (diet\*[tiab] OR food\*[tiab])) OR

poach[tiab] OR poached[tiab] OR steamed[tiab] OR barbecue\*[tiab] OR chargrill\*[tiab] OR heterocyclic amines[tiab]

OR polycyclic aromatic hydrocarbons[tiab]

17. ((carbohydrates[MeSH Terms] OR proteins[MeSH Terms]) AND (diet\*[tiab] OR food\*[tiab])) OR sweetening

agents[MeSH Terms]

18. (salt[tiab] OR salting[tiab] OR salted[tiab] OR fiber[tiab] OR fibre[tiab] OR polysaccharide\*[tiab] OR starch[tiab]

OR starchy[tiab] OR carbohydrate\*[tiab] OR lipid\*[tiab] OR linoleic acid\*[tiab] OR sterols[tiab] OR stanols[tiab] OR

sugar\*[tiab] OR sweetener\*[tiab] OR saccharin\*[tiab] OR aspartame[tiab] OR acesulfame[tiab] OR cyclamates[tiab]

OR maltose[tiab] OR mannitol[tiab] OR sorbitol[tiab] OR sucrose[tiab] OR xylitol[tiab] OR cholesterol[tiab] OR

protein[tiab] OR proteins[tiab] OR hydrogenated dietary oils[tiab] OR hydrogenated lard[tiab] OR hydrogenated oils[tiab]) AND (diet\*[tiab] OR food\*[tiab] OR adipose[tiab] OR blood[tiab] OR serum[tiab] OR plasma[tiab])

19. vitamins[MeSH Terms]

20. supplements[tiab] OR supplement[tiab] OR vitamin\*[tiab] OR retinol[tiab] OR carotenoid\*[tiab] OR tocopherol[tiab] OR folate\*[tiab] OR folic acid[tiab] OR methionine[tiab] OR riboflavin[tiab] OR thiamine[tiab] OR niacin[tiab] OR pyridoxine[tiab] OR cobalamin[tiab] OR mineral\*[tiab] OR (sodium[tiab] AND (diet\*[tiab] OR food\*[tiab])) OR iron[tiab] OR ((calcium[tiab] AND (diet\*[tiab] OR food\*[tiab] OR supplement\*[tiab])) OR selenium[tiab] OR (iodine[tiab] AND (diet\*[tiab] OR food\*[tiab] OR supplement\*[tiab] OR deficiency)) OR magnesium[tiab] OR potassium[tiab] OR zinc[tiab] OR copper[tiab] OR phosphorus[tiab] OR manganese[tiab] OR chromium[tiab] OR phytochemical[tiab] OR allium[tiab] OR isothiocyanate\*[tiab] OR glucosinolate\*[tiab] OR indoles[tiab] OR polyphenol\*[tiab] OR phytestrogen\*[tiab] OR genistein[tiab] OR saponin\*[tiab] OR coumarin\*[tiab] OR lycopene[tiab])

21. **physical fitness[MeSH Terms] OR physical exertion[MeSH Terms] OR physical endurance[MeSH Terms] OR walking[MeSH Terms] OR exercise[MeSH Terms] OR muscle stretching exercises[MeSH Terms] OR tai ji[MeSH Terms] OR yoga[MeSH Terms] OR sedentary lifestyle[MeSH Terms]**

22. **recreational activit\*[tiab] OR household activit\*[tiab] OR occupational activit\*[tiab] OR physical activit\*[tiab] OR physical inactivit\*[tiab] OR exercise[tiab] OR exercising[tiab] OR energy intake[tiab] OR energy expenditure[tiab] OR energy balance[tiab] OR energy density[tiab] OR sedentar\*[tiab] OR standing[tiab] OR sitting[tiab] OR television[tiab] OR aerobic activities[tiab] OR aerobic activity[tiab] OR cardiovascular activities[tiab] OR cardiovascular activity[tiab] OR endurance activities[tiab] OR endurance activity[tiab] OR resistance training[tiab] OR strength training[tiab] OR physical conditioning[tiab] OR functional training[tiab] OR leisure-time physical activity[tiab] OR lifestyle activities[tiab] OR lifestyle activity[tiab] OR qi gong[tiab] OR tai chi[tiab] OR tai ji[tiab] OR yoga[tiab] OR free living activities[tiab] OR free living activity[tiab] OR walk[tiab] OR walking[tiab]**

23. body weight[MeSH Terms] OR anthropometry[MeSH Terms] OR body composition[MeSH Terms] OR body constitution[MeSH Terms] OR body size[MeSH Terms] OR body size[tiab]

24. weight loss[tiab] OR weight gain[tiab] OR anthropometry[tiab] OR birth weight[tiab] OR birthweight[tiab] OR birth-weight[tiab] OR child development[tiab] OR height[tiab] OR body composition[tiab] OR body mass index[tiab] OR BMI[tiab] OR obesity[tiab] OR obese[tiab] OR overweight[tiab] OR over-weight[tiab] OR over weight[tiab] OR skinfold measurement\*[tiab] OR skinfold thickness[tiab] OR DEXA[tiab] OR bio-impedence[tiab] OR waist circumference[tiab] OR hip circumference[tiab] OR waist hip ratio\*[tiab]

25. #6 OR #7 OR #8 OR #9 OR #10 OR #11 OR #12 OR #13 OR #14 OR #15 OR #16 OR #17 OR #18 OR #19 OR #20 OR #21 OR #22 OR #23 OR #24

**d. Limiting to human studies:**

26. animal [MeSH Terms] NOT human [MeSH Terms]

27. #25 NOT #26

**e. Combining the searches for each cancer**

(a) AND (b) AND (c) AND (d)  
i.e. #1 AND #5 AND #27

**Supplementary Table 2B Search terms used for OVID Embase.**

**a. Searching for mortality, survival, recurrence, second cancer.**

- 1 \*Recurrent disease/
- 2 \*Disease exacerbation/



- 3 Disease free survival/
- 4 mortality/ or all-cause mortality/ or cancer mortality/ or cardiovascular mortality/ or mortality rate/ or premature mortality/
- 5 Survival analysis/
- 6 Relapse/
- 7 Survivor/
- 8 Second cancer/
- 9 (recur\$ or local recurrence or progression or relap\$ or prognos\$ or surviv\$ or mortality or death or (second\$ adj5 primar\$)).ab,ti.
- 10 1 or 2 or 3 or 4 or 5 or 6 or 7 or 8 or 9

**b. Searching for studies on breast cancer**

- 11 breast tumor/
- 12 (breast and (cancer\$ or neoplasm\$ or tumour\$ or tumor\$ or carcinoma\$ or adenocarcinoma\$)).tw,kw.
- 13 (mammary and (cancer\$ or neoplasm\$ or tumour\$ or tumor\$ or carcinoma\$ or adenocarcinoma\$)).tw,kw.
- 14 11 or 12 or 13

**c. Search for all studies relating to diet, body fatness and physical activity**

- 15 Diet therapy/
- 16 Nutrition/
- 17 (diet or diets or dietetic\$ or dietary or eating or intake or nutrient\$ or nutrition or vegetarian\$ or vegan\$ or (seventh adj1 day adj1 adventist) or macrobiotic).ab,ti.
- 18 15 or 16 or 17
- 19 Food/
- 20 (food\$ or cereal\$ or grain\$ or granary or wholegrain or wholewheat or roots or plantain\$ or tuber or tubers or vegetable\$ or fruit\$ or pulses or beans or lentils or chickpeas or legume\$ or soy or soya or nut or nuts or peanut\$ or groundnut\$ or (seeds and (diet\$ or food\$))).ab,ti.
- 21 (meat or beef or pork or lamb or poultry or chicken or turkey or duck or (fish and (diet\$ or food\$)) or ((fat or fats or fatty) and (diet\$ or food\$ or adipose or blood or serum or plasma)) or egg or eggs or bread or (oils and (diet\$ or food\$ or adipose or blood or serum or plasma)) or shellfish or seafood or sugar or syrup or dairy or milk or herbs or spices or chilli or chillis or pepper\$ or condiments or tomato\$).ab,ti.

- 22 19 or 20 or 21
- 23 Beverage/
- 24 (fluid intake or water or drinks or drinking or tea or coffee or caffeine or juice or beer or spirits or liquor or wine or alcohol or alcoholic or beverage\$ or (ethanol and (drink\$ or intake or consumption)) or yerba mate or ilex or paraguariensis).ab,ti.
- 25 23 or 24
- 26 \*Pesticide/
- 27 \*Fertilizer/
- 28 \*Veterinary drug/
- 29 (pesticide\$ or herbicide\$ or DDT or fertiliser\$ or fertilizer\$ or organic or contaminants or contaminate\$ or veterinary drug\$ or polychlorinated dibenzofuran\$ or PCDF\$ or polychlorinated dibenzodioxin\$ or PCDD\$ or polychlorinated biphenyl\$ or PCB\$ or cadmium or arsenic or chlorinated hydrocarbon\$ or microbial contamination\$).ab,ti.
- 30 26 or 27 or 28 or 29
- 31 Food Preservation/
- 32 ((mycotoxin\$ or aflatoxin\$ or pickled or bottled or bottling or canned or canning or vacuum pack\$ or refrigerate\$ or refrigeration or cured or smoked or preserved or preservatives or nitrosamine or hydrogenation or fortified or additive\$ or colouring\$ or coloring\$ or flavouring\$ or flavoring\$ or nitrates or nitrites or solvent or solvents or ferment\$ or processed or antioxidant\$ or genetic modif\$ or genetically modif\$ or vinyl chloride or packaging or labelling or phthalates) and (diet\$ or food\$ or adipose or blood or serum or plasma)).ab,ti.
- 33 31 or 32
- 34 Cooking/
- 35 (cooking or cooked or grill or grilled or fried or fry or roast or bake or baked or stewing or stewed or casserol\$ or broil or broiled or boiled or (microwave or microwaved or re-heating or reheating or heating or re-heated or heated and (diet\$ or food\$)) or poach or poached or steamed or barbecue\$ or chargrill\$ or heterocyclic amines or polycyclic aromatic hydrocarbons).ab,ti.
- 36 34 or 35
- 37 Carbohydrate/ and ((diet\$ or food\$).ab,ti.)
- 38 Protein/ and ((diet\$ or food\$).ab,ti.)
- 39 Sweetening agent/

- 40 ((salt or salting or salted or fiber or fibre or polysaccharide\$ or starch or starchy or carbohydrate\$ or lipid\$ or linoleic acid\$ or sterols or stanols or sugar\$ or sweetener\$ or saccharin\$ or aspartame or acesulfame or cyclamates or maltose or mannitol or sorbitol or sucrose or xylitol or cholesterol or hydrogenated dietary oils or hydrogenated lard or hydrogenated oils or protein\$) and (diet\$ or food\$ or adipose or blood or serum or plasma)).ab,ti.
- 41 37 or 38 or 39 or 40
- 42 Vitamins/
- 43 Vitamin D/ or (supplements or supplement or vitamin\$ or retinol or carotenoid\$ or tocopherol or folate\$ or folic acid or methionine or riboflavin or thiamine or niacin or pyridoxine or cobalamin or mineral\$ or (sodium and (diet\$ or food\$)) or iron or (calcium and (diet\$ or food\$ or supplement\$)) or selenium or (iodine and (diet\$ or food\$ or supplement\$ or deficiency)) or magnesium or potassium or zinc or copper or phosphorus or manganese or chromium or phytochemical or allium or isothiocyanate\$ or glucosinolate\$ or indoles or polyphenol\$ or phytoestrogen\$ or genistein or saponin\$ or coumarin\$ or lycopene).ab,ti.
- 44 42 or 43
- 45 **\*Fitness/**
- 46 **Exercise/**
- 47 **\*Endurance/**
- 48 **Walking/**
- 49 **Stretching exercise/**
- 50 **Tai Chi/**
- 51 **Qigong/**
- 52 **Yoga/**
- 53 **Sedentary lifestyle/**
- 54 **(physical fitness or physical exertion or physical endurance or muscle stretching exercise\$ or recreational activit\$ or household activit\$ or occupational activit\$ or physical activit\$ or physical inactivit\$ or exercise\$ or exercising or energy intake or energy expenditure or energy balance or energy density or sedentar\$ or standing or sitting or television viewing or aerobic activit\$ or cardiovascular activit\$ or endurance activit\$ or resistance training or strength training or physical conditioning or functional training or leisure time physical activit\$ or lifestyle activit\$ or qigong or tai chi or tai ji or yoga or free living activit\$ or walk or walking).ab,ti.**
- 55 **45 or 46 or 47 or 48 or 49 or 50 or 51 or 52 or 53 or 54**
- 56 Body weight/
- 57 Anthropometry/

- 58 Body Composition/
- 59 Body Constitution/
- 60 Body size/
- 61 (weight or weight loss or weight gain or anthropometry or birth weight or birthweight or birth weight or child development or height or body composition or fat distribution or body mass or BMI or obesity or obese or overweight or over weight or skinfold measurement\$ or skinfold thickness or DEXA or bio-impedence or waist circumference or hip circumference or waist hip ratio\$ or body size).ab.ti.
  
- 62 56 or 57 or 58 or 59 or 60 or 61
- 63 18 or 22 or 25 or 30 or 33 or 36 or 41 or 44 or 55 or 62
- 64 exp animal/
- 65 exp human/
- 66 64 not 65
- 67 63 not 66

**Combined**

- 68 10 and 14 and 67

| Supplementary Table 3 Grading Criteria for evidence on diet, nutrition, physical activity and survival in women with breast cancer |                                     |                                                                                                                                                                                                                                                                                                                                                                     |      |    |              |
|------------------------------------------------------------------------------------------------------------------------------------|-------------------------------------|---------------------------------------------------------------------------------------------------------------------------------------------------------------------------------------------------------------------------------------------------------------------------------------------------------------------------------------------------------------------|------|----|--------------|
| Evidence grades                                                                                                                    |                                     | GRADING CRITERIA FOR EVIDENCE ON DIET, NUTRITION, PHYSICAL ACTIVITY AND SURVIVAL IN WOMEN WITH BREAST CANCER                                                                                                                                                                                                                                                        | Het  | PB | Mec          |
| Strong evidence                                                                                                                    | Convincing                          | Evidence of an effect from a meta-analysis of RCTs or at least two well-designed independent RCTs                                                                                                                                                                                                                                                                   | No   | No | Desirable    |
|                                                                                                                                    | Probable                            | Evidence of an effect from a meta-analysis of RCTs or two well-designed RCTs                                                                                                                                                                                                                                                                                        | Some | No | Desirable    |
|                                                                                                                                    |                                     | OR Evidence of an effect from one well-designed RCT and one well-designed cohort study                                                                                                                                                                                                                                                                              | No   | No | Required     |
|                                                                                                                                    |                                     | OR Evidence from at least one well-designed pooled analysis of follow-up studies                                                                                                                                                                                                                                                                                    | No   | No | Required     |
|                                                                                                                                    |                                     | OR Evidence from at least two independent well-designed follow-up studies                                                                                                                                                                                                                                                                                           | No   | No | Required     |
| Limited evidence                                                                                                                   | Limited suggestive                  | Evidence from a meta-analysis of RCTs or at least two well-designed RCTs but the confidence interval may include the null                                                                                                                                                                                                                                           | Some | No | Not required |
|                                                                                                                                    |                                     | OR Evidence from one well-designed RCT but the confidence interval may include the null                                                                                                                                                                                                                                                                             | No   | No | Required     |
|                                                                                                                                    |                                     | OR Evidence of an effect from a pooled analysis of follow-up studies                                                                                                                                                                                                                                                                                                | Some | No | Not required |
|                                                                                                                                    |                                     | OR Evidence from a pooled analysis of follow-up studies but the confidence interval may include the null                                                                                                                                                                                                                                                            | Some | No | Required     |
|                                                                                                                                    |                                     | OR Evidence of an effect from at least one follow-up study                                                                                                                                                                                                                                                                                                          | No   | No | Required     |
|                                                                                                                                    |                                     | OR Evidence of an effect from at least two follow-up studies                                                                                                                                                                                                                                                                                                        | No   | No | Not required |
|                                                                                                                                    |                                     | OR Evidence from at least two follow-up studies but the confidence interval may include the null                                                                                                                                                                                                                                                                    | Some | No | Required     |
|                                                                                                                                    | Limited – no conclusion             | Any of the following reasons:<br>- Too few studies available<br>- Inconsistency of direction of effect<br>- Poor quality of studies                                                                                                                                                                                                                                 | -    | -  | -            |
| Strong evidence                                                                                                                    | Substantial effect on risk unlikely | Evidence of the absence of an effect (a summary estimate close to 1.0) from any of the following:<br>a) A meta-analysis of RCTs<br>b) At least two well-designed independent RCTs<br>c) A well-designed pooled analysis of follow-up studies<br>d) At least two well-designed follow-up studies<br>- Absence of a dose response relationship (in follow-up studies) | No   | -  | Absence      |

**Het:** Substantial unexplained heterogeneity or some unexplained heterogeneity  
**PB:** Publication bias  
**Mec:** Strong and plausible mechanistic evidence is required, desirable but not required, not required, or absent

**Special upgrading factors:**

- Presence of a plausible biological gradient ('dose response') in the association. Such a gradient need not be linear or even in the same direction across the different levels of exposure, so long as this can be explained plausibly.
- A particularly large summary effect size (a relative risk of 2.0 or more, or 0.5 or less, depending on the unit of exposure), after appropriate control for confounders.
- Evidence from appropriately controlled experiments demonstrating one or more plausible and specific mechanisms.
- All plausible known residual confounders or biases including reverse causation would reduce a demonstrated effect, or suggest a spurious effect when results show no effect. Special considerations important for evidence for breast cancer survivors including the following potential confounding variables – the type of tumour, type of treatment, amount of treatment received, and the dissemination of the disease.

| Supplementary table 4 Physical activity definition in observational studies included in the review |                                                                                              |                                                                                                                                                                                                                                                                                                                                                                                                                                                                                                                                                                                                                                                          |                                                                     |
|----------------------------------------------------------------------------------------------------|----------------------------------------------------------------------------------------------|----------------------------------------------------------------------------------------------------------------------------------------------------------------------------------------------------------------------------------------------------------------------------------------------------------------------------------------------------------------------------------------------------------------------------------------------------------------------------------------------------------------------------------------------------------------------------------------------------------------------------------------------------------|---------------------------------------------------------------------|
| Study, country                                                                                     | Publications Author Year                                                                     | Domains                                                                                                                                                                                                                                                                                                                                                                                                                                                                                                                                                                                                                                                  | Physical activity categorisation (total or recreational) in the SLR |
| ABCP (includes: WHEL, LACE, NHS, SBCSS)<br>USA and China                                           | Beasley 2012<br>Nechuta 2016<br>(Nechuta 2016 includes only the three USA cohorts not SBCSS) | Running, swimming, biking for exercise, stair master, aerobics, sit-ups, yoga, cross-country, skiing, downhill skiing, hiking, walking for exercise, volleyball, tennis, soccer, baseball, golf, horseback riding, fishing, dancing, and ballet (LACE)<br>Walking or hiking outdoors, jogging, or running, bicycling, swimming, tennis, calisthenics, aerobics, squash or racquetball, lower intensity exercise (yoga, stretching, and toning) and other vigorous activities (i.e., lawn mowing) (NHS)<br>Type and duration of any recreational physical activity (SBCSS)<br>Walking and duration/frequency of strenuous, moderate, mild exercise (WHEL) | Recreational                                                        |
| CPS-II Nutrition Cohort, USA                                                                       | Maliniak 2018                                                                                | Moderate-to-vigorous recreational physical activity including walking, dancing, bicycling, aerobics, tennis or racquetball, jogging or running, and lap swimming                                                                                                                                                                                                                                                                                                                                                                                                                                                                                         | Recreational                                                        |
| CWLS, USA                                                                                          | Holick 2008                                                                                  | Hours per week of six recreational activities over the previous year: walking outdoors; running ( $\geq 10$ min/mile); lap swimming; tennis, squash, or racquetball; calisthenics, aerobics, or rowing machine; and other aerobic recreation (e.g., lawn mowing). Usual walking pace (easy or $< 2$ mph, average or 2-2.9 mph, brisk or 3-3.9 mph, and very brisk or $\geq 4$ mph) and number of flights of stairs climbed daily.                                                                                                                                                                                                                        | Recreational                                                        |
| DCH, Denmark                                                                                       | Ammitzbol I 2016                                                                             | Exercise (sports, walking, cycling); household PA (housework, do-it-yourself, gardening). Total was defined as exercise and household PA.                                                                                                                                                                                                                                                                                                                                                                                                                                                                                                                | Recreational<br>Household                                           |
| HEAL, USA                                                                                          | Irwin 2008                                                                                   | Recreational physical activity (e.g., brisk walking for exercise)                                                                                                                                                                                                                                                                                                                                                                                                                                                                                                                                                                                        | Recreational                                                        |
| LACE and Pathways, USA                                                                             | Jones 2016                                                                                   | Exercise exposure was assessed using items from the Arizona Activity Frequency Questionnaire. Patients reported the frequency and duration of leisure-time recreational activities (e.g., walking, jogging, running, bicycling, swimming laps, racket sports) performed at least once a month in the past 6 (Pathways) or 12 months (LACE). Non-recreational activity (e.g., occupational activity, activities of daily living) was not included.                                                                                                                                                                                                        | Recreational                                                        |
| LACE, USA                                                                                          | Sternfeld 2009                                                                               | Based on Arizona Activity Frequency Questionnaire: job or work-related activities (including volunteer work), non-work routine activities (including household chores (6 items), caregiving (5 items), and home maintenance and repairs (7 items)), recreational activities (subdivided                                                                                                                                                                                                                                                                                                                                                                  | Total                                                               |

|                                      |                |                                                                                                                                                                                                                                                                                                                                                                                                                                                                                                                                                                                                                                                                                |                                                                            |
|--------------------------------------|----------------|--------------------------------------------------------------------------------------------------------------------------------------------------------------------------------------------------------------------------------------------------------------------------------------------------------------------------------------------------------------------------------------------------------------------------------------------------------------------------------------------------------------------------------------------------------------------------------------------------------------------------------------------------------------------------------|----------------------------------------------------------------------------|
|                                      |                | into sports, exercise, and dance (22 items), sedentary recreational activities such as reading or socializing (6 items), and transportation (motorized or active transport (4 items)                                                                                                                                                                                                                                                                                                                                                                                                                                                                                           | (Occupational, household, recreational and transportation)<br>Recreational |
| LIBCSP, USA                          | Bradshaw 2014  | Recreational PA was assessed through structured interviews at baseline and follow-up using a modified questionnaire developed for a previous study of PA and breast cancer questionnaire was semi-open ended and assessed duration and average number of hours per week for each activity reported; MET was assigned to each activity                                                                                                                                                                                                                                                                                                                                          | Recreational                                                               |
| NHS, USA                             | Holmes 2005    | Leisure-time physical activity: walking or hiking outdoors (including walking while playing golf); jogging (>10 minutes per mile); running ( $\leq$ 10 minutes per mile); bicycling (including stationary bike); swimming laps; tennis; calisthenics, aerobics, aerobic dance, or rowing machine; or squash or racquetball, vigorous activities (e.g., lawn mowing) and lower-intensity exercise (e.g., yoga, stretching)                                                                                                                                                                                                                                                      | Recreational                                                               |
| NOWAC, Norway                        | Borch 2015     | Physical activity both at work and outside work, at home, as well as training/exercise and other physical activity, such as walking, etc. Assessed by self-report on an ordinal scale of 1 to 10.                                                                                                                                                                                                                                                                                                                                                                                                                                                                              | Total<br>(Occupational, household, recreational and transportation)        |
| SBCSS, China                         | Chen, 2011     | Regular exercise frequency and duration for up to five types of the most common exercises (methods described in Chen 2011). Each activity was assigned a metabolic equivalent (MET) score. Walking was the most common type of regular exercise carried out in this study population (52%), followed by gymnastics (14%), body building (7%), and traditional Chinese exercises (5%, including Qigong and Tai Chi).                                                                                                                                                                                                                                                            | Recreational                                                               |
| TEAM-L side study, Various countries | de Glas 2014   | Time per week in the summer and winter on the following recreational activities: walking, cycling, gardening, and sports                                                                                                                                                                                                                                                                                                                                                                                                                                                                                                                                                       | Recreational                                                               |
| WISC, USA                            | Veal 2017      | Patterned on the Nurses' Health Study questionnaire. Regular physical activity (at least 30 min per week for at least 3 months of the year) including swimming, jogging/running, bicycling, calisthenics/aerobics/dance, racquet sports, walking/ hiking for exercise, and other individual and team activities as an open-ended response option. Participants reported the number of months per year and hours per week spent performing each activity.                                                                                                                                                                                                                       | Recreational                                                               |
| WHEL, USA                            | Bertram 2011   | 9-item physical activity questionnaire adapted from the Women's Health Initiative (WHI). The physical activity questionnaire assessed frequency, duration, and speed of walking outside the home and frequency and duration of participation in each of three intensity levels of exercise: mild, moderate, or strenuous (with example activities for each level). Moderate intensity: defined as 3-6 METs-h (this included walking, sports, exercise, and dance) and $\geq$ 6 METs-h intensity for vigorous activity. Examples of moderate to vigorous activities were 150 min/week of moderate pace walking or the equivalent amount of other exercise durations/intensities | Recreational                                                               |
| WHI, USA                             | Irwin 2011     | Frequency and duration of vigorous exercise (that increased heart rate and produced sweating) including aerobics, jogging, tennis, and swimming laps and of moderate intensity physical activities (including biking outdoors, exercise machine, calisthenics, easy swimming, and popular or folk dancing). Walking could be included in both categories depending on the pace                                                                                                                                                                                                                                                                                                 | Recreational                                                               |
| NHIS, USA                            | Tarasenko 2018 | Frequency and duration of moderate- and vigorous-intensity aerobic and muscle-strengthening activities. Meeting the American College of Sports Medicine (ACSM) and American Cancer Society (ACS) exercise recommendations.                                                                                                                                                                                                                                                                                                                                                                                                                                                     | Recreational                                                               |

|                         |                  |                                                                                                                                                                                                                                                                                                                                                                                                                                                                                                                                                                                              |                                       |
|-------------------------|------------------|----------------------------------------------------------------------------------------------------------------------------------------------------------------------------------------------------------------------------------------------------------------------------------------------------------------------------------------------------------------------------------------------------------------------------------------------------------------------------------------------------------------------------------------------------------------------------------------------|---------------------------------------|
| USA                     | Palesh<br>2018   | Range of physical activities “moderate activities” (eg, yoga, mopping floors, sweeping, walking on a firm level surface 3-4 mph), “hard activities” (eg, aerobic dance, badminton, fast walking, scrubbing floors), or “very hard activities” (eg, circuit training, racquetball, rope jumping, cross-country running).                                                                                                                                                                                                                                                                      | Recreational                          |
| NRWHS, USA              | Williams<br>2014 | Distance run or walked was obtained from the question “Average miles run per week for:” and then listed the current and preceding 5 years with spaces for the responses. To calculate MET-hours/day for walking, we converted walking distance into duration (i.e., distance/mph) and calculated the average hours walked per day and the MET value for the reported pace. Running MET values were calculated as 1.02 MET-hours per km                                                                                                                                                       | Recreational<br>(Walking and running) |
| DELCaP, USA             | Cannioto<br>2021 | DELCaP questionnaire was adapted from the Lifetime Physical Activity Questionnaire, a self-administered survey with established reliability among adult women and assessed mode, frequency, and duration of recreational physical activity. Total MET minutes/hours were calculated for each person at each time based on corresponding codes and MET values published in the Physical Activity Compendium. Activities were included in the analysis if performed at least once a week throughout the exposure window assessed and if the compendium MET value was at least 3.0 or higher.   | Recreational                          |
| MARIE study,<br>Germany | Jung 2019        | Physical activity assessment included self-reported participation in walking and cycling for the purposes of commuting/transportation as well as recreational activities, sports, and fitness. MET-h/week were calculated by multiplying the average hours per week spent on each activity with an individual intensity score. Leisure-time physical activity defined as additional activities related to recreational physical activities, sports, and fitness. We have evaluated leisure-time physical activity and not total physical activity in relation to prognosis in this analysis. | Recreational                          |



| Supplementary Table 5A Descriptive table of studies included in analyses of total physical activity after diagnosis and breast cancer prognosis |                                                                                                                                                        |                                                                |                                                                                                                       |                                                                                                                                             |                                          |                                                                                                                    |                                                                                        |                                                                                                                                                                                                                                                                                                                                                                                                                                                                                                                                                                                        |                                     |
|-------------------------------------------------------------------------------------------------------------------------------------------------|--------------------------------------------------------------------------------------------------------------------------------------------------------|----------------------------------------------------------------|-----------------------------------------------------------------------------------------------------------------------|---------------------------------------------------------------------------------------------------------------------------------------------|------------------------------------------|--------------------------------------------------------------------------------------------------------------------|----------------------------------------------------------------------------------------|----------------------------------------------------------------------------------------------------------------------------------------------------------------------------------------------------------------------------------------------------------------------------------------------------------------------------------------------------------------------------------------------------------------------------------------------------------------------------------------------------------------------------------------------------------------------------------------|-------------------------------------|
| Author, year, study name, country, WCRF Code                                                                                                    | Study description                                                                                                                                      | Time of diagnosis and follow-up                                | Disease characteristic s treatment                                                                                    | Exposure assessment                                                                                                                         | Outcome (Events)                         | Contrast                                                                                                           | HR (95% CI)                                                                            | Covariates                                                                                                                                                                                                                                                                                                                                                                                                                                                                                                                                                                             |                                     |
| Borch 2015, NOWAC, Norway                                                                                                                       | Population based cohort study of 1327 pre and postmenopausal (mainly) women<br><br>Mean Age at diagnosis: 53.3 years                                   | 1991-2003 until 2012 Follow up= 10.6 years                     | Tumour stage, n (%) I 591 (44.5) II, 534 (40.2) III 25 (1.8) IV 20 (1.5) Unknown 158 (11.9)                           | Self-completed questionnaire, assessed on average 3 years after diagnosis                                                                   | All-cause mortality (n=197)              | Very high vs. moderate (assessed using ordinal score with range 1 to 10, 1 being very low and 10 being very high") | 0.46<br>(0.17-1.28)<br>P trend=NA                                                      | Age, tumour stage, pre-diagnosis physical activity, time from diagnosis to post-diagnostic PA assessment ≤365/>365 days<br><br>*Sensitivity analyses carried out including other covariates, such as hormonal therapy (menopausal) use (ever/never), and comorbidities, such as diabetes and cardiovascular diseases, smoking status (ever/never), pack-years smoked, alcohol consumption (g/day), and duration of education (years). As these covariates had no statistically significant impact on the investigated associations, these analyses are not reported in the main result |                                     |
|                                                                                                                                                 |                                                                                                                                                        |                                                                |                                                                                                                       |                                                                                                                                             | BMI<25 kg/m <sup>2</sup> (n=115)         |                                                                                                                    | 0.33 (0.08-1.39)<br>P trend<0.001                                                      |                                                                                                                                                                                                                                                                                                                                                                                                                                                                                                                                                                                        |                                     |
|                                                                                                                                                 |                                                                                                                                                        |                                                                |                                                                                                                       |                                                                                                                                             | BMI>25 kg/m <sup>2</sup> (n=79)          |                                                                                                                    | 1.15 (0.27-4.93)<br>P trend=0.007                                                      |                                                                                                                                                                                                                                                                                                                                                                                                                                                                                                                                                                                        |                                     |
|                                                                                                                                                 |                                                                                                                                                        |                                                                |                                                                                                                       |                                                                                                                                             | Breast cancer-specific mortality (n=155) |                                                                                                                    | 0.5 (0.15-1.62)<br>P trend=NA                                                          |                                                                                                                                                                                                                                                                                                                                                                                                                                                                                                                                                                                        |                                     |
|                                                                                                                                                 |                                                                                                                                                        |                                                                |                                                                                                                       |                                                                                                                                             | BMI<25 kg/m <sup>2</sup> (n=91)          |                                                                                                                    | 0.44 (0.10-1.66)<br>P trend<0.001                                                      |                                                                                                                                                                                                                                                                                                                                                                                                                                                                                                                                                                                        |                                     |
|                                                                                                                                                 |                                                                                                                                                        |                                                                |                                                                                                                       |                                                                                                                                             | BMI>25 kg/m <sup>2</sup> (n=61)          |                                                                                                                    | 1.27 (0.17-9.77)<br>P trend=0.006                                                      |                                                                                                                                                                                                                                                                                                                                                                                                                                                                                                                                                                                        |                                     |
|                                                                                                                                                 |                                                                                                                                                        |                                                                |                                                                                                                       |                                                                                                                                             | All-cause mortality                      |                                                                                                                    | Reduced physical activity level <5, vs. maintain active physical activity, levels 5-10 |                                                                                                                                                                                                                                                                                                                                                                                                                                                                                                                                                                                        | 1.76 (1.21-2.56)                    |
|                                                                                                                                                 |                                                                                                                                                        |                                                                |                                                                                                                       |                                                                                                                                             | Breast cancer-specific mortality         |                                                                                                                    |                                                                                        |                                                                                                                                                                                                                                                                                                                                                                                                                                                                                                                                                                                        | 2.05 (1.35-3.10)                    |
| Sternfeld 2009, LACE, USA,                                                                                                                      | Prospective cohort study of 1970 breast cancer survivors diagnosed within 39 months of enrolment; had completed cancer treatment; and were free of any | Diagnosed in 1997-2000, mean follow up= 87 months SD=18 months | 68.2% ER+/ PR+, 14.2% ER+/ PR-, 1.8% ER-/ PR+, 15.8% ER-/ PR-<br><br>47.6% stage I, 33.4% stage IIa, 16.0% stage IIb, | Questionnaire based on the Arizona Activity Frequency Questionnaire (validated against doubly labelled water) including job or work-related | All-cause mortality (n=187)              | ≥62 vs. <29 MET-h/week                                                                                             | 0.76<br>(0.48-1.19)<br>P trend=0.20                                                    | Age, number of positive nodes, stage, weight at 18 years, education level and smoking status                                                                                                                                                                                                                                                                                                                                                                                                                                                                                           |                                     |
|                                                                                                                                                 |                                                                                                                                                        |                                                                |                                                                                                                       |                                                                                                                                             | Breast cancer-specific mortality (n=102) |                                                                                                                    | ≥62 vs. <29 MET-h/week                                                                 |                                                                                                                                                                                                                                                                                                                                                                                                                                                                                                                                                                                        | 0.87<br>(0.48-1.59)<br>P trend=0.41 |

| Supplementary Table 5A Descriptive table of studies included in analyses of total physical activity after diagnosis and breast cancer prognosis                                                                                                                                                                                                             |                                                                                                   |                                 |                                                                                                             |                                                                                                                                                      |                                                                                                              |                        |                                         |                                                             |
|-------------------------------------------------------------------------------------------------------------------------------------------------------------------------------------------------------------------------------------------------------------------------------------------------------------------------------------------------------------|---------------------------------------------------------------------------------------------------|---------------------------------|-------------------------------------------------------------------------------------------------------------|------------------------------------------------------------------------------------------------------------------------------------------------------|--------------------------------------------------------------------------------------------------------------|------------------------|-----------------------------------------|-------------------------------------------------------------|
| Author, year, study name, country, WCRF Code                                                                                                                                                                                                                                                                                                                | Study description                                                                                 | Time of diagnosis and follow-up | Disease characteristic s treatment                                                                          | Exposure assessment                                                                                                                                  | Outcome (Events)                                                                                             | Contrast               | HR (95% CI)                             | Covariates                                                  |
|                                                                                                                                                                                                                                                                                                                                                             | documented recurrence.<br><br>Pre and postmenopausal<br><br>Age range at enrolment 18 to 79 years |                                 | 2.9% stage IIIa Surgery: 50.4% conserving, 49.6% mastectomy; Chemotherapy: 56.3%; Radiation therapy: 62.9 % | activities, recreational activities and transportation. Questionnaire mailed to participants semi-annually until April 2006 and annually thereafter. | Recurrence (n=225)<br><br>(local, regional, or distant recurrence or metastasis or death from breast cancer) | ≥62 vs. <29 MET-h/week | 0.91<br><br>(0.61-1.36)<br>P trend=0.78 | Age, number of positive nodes, stage and weight at 18 years |
| NOWAC Norwegian Women and Cancer study, LACE Life After Cancer Epidemiology study, USA United States of America, MET Metabolic equivalent of task, BMI Body mass index, ER+ Estrogen receptor positive, ER- Estrogen receptor negative, PR+ Progesterone receptor positive, PR- Progesterone receptor negative, SD Standard deviation, PA physical activity |                                                                                                   |                                 |                                                                                                             |                                                                                                                                                      |                                                                                                              |                        |                                         |                                                             |

**Supplementary Table 5B Descriptive table of studies included in analyses of recreational physical activity after diagnosis and breast cancer prognosis**

| Author, year, study name, country, WCRF Code | Study description                                                                                                                         | Time of diagnosis and follow-up | Disease characteristics treatment   | Exposure assessment                                                                                                             | Outcome (Events)            | Contrast                                                                                                                                                                                                                                                                                           | HR (95% CI)      | Covariates     |
|----------------------------------------------|-------------------------------------------------------------------------------------------------------------------------------------------|---------------------------------|-------------------------------------|---------------------------------------------------------------------------------------------------------------------------------|-----------------------------|----------------------------------------------------------------------------------------------------------------------------------------------------------------------------------------------------------------------------------------------------------------------------------------------------|------------------|----------------|
| Cannioto 2021, DELCaP, USA                   | Prospective follow up of 1340 pre- and post-menopausal women from a randomised controlled trial<br><br>SWOG<br><br>clinical trial (S0221) | Mean follow-up: 89 months       | High-risk stage I-III breast cancer | Mode, frequency, and duration of recreational physical activity self-reported from the Lifetime Physical Activity Questionnaire | All-cause mortality (n=182) | <p><b>Questionnaire two (Q2)</b></p> <p>Administered at treatment completion. Represents recreational activity during chemotherapy.</p> <p>Any regular recreational physical activity (1 session/week)</p> <p>Yes, vs No</p>                                                                       | 0.64 (0.47-0.86) | Age, study arm |
|                                              |                                                                                                                                           |                                 |                                     |                                                                                                                                 |                             | <p>Meeting minimum PAGAs</p> <p>Yes, vs No</p>                                                                                                                                                                                                                                                     | 0.56 (0.39-0.80) |                |
|                                              |                                                                                                                                           |                                 |                                     |                                                                                                                                 |                             | <p>Incremental activity categories (PAGAs)</p> <p>High activity vs no weekly recreational physical activity</p>                                                                                                                                                                                    | 0.57 (0.36-0.88) |                |
|                                              |                                                                                                                                           |                                 |                                     |                                                                                                                                 |                             | <p><b>Questionnaire three (Q3)</b></p> <p>Administered one year after study enrolment and assessed activity performed in previous 12 months.</p> <p>(Approximately six months after treatment completion)</p> <p>Any regular recreational physical activity (1 session/week)</p> <p>Yes, vs No</p> | 0.56 (0.39-0.81) |                |

Supplementary Table 5B Descriptive table of studies included in analyses of recreational physical activity after diagnosis and breast cancer prognosis

| Author, year, study name, country, WCRF Code | Study description | Time of diagnosis and follow-up | Disease characteristics treatment | Exposure assessment | Outcome (Events) | Contrast                                                                                                                                                                                                                                                                                  | HR (95% CI)      | Covariates |
|----------------------------------------------|-------------------|---------------------------------|-----------------------------------|---------------------|------------------|-------------------------------------------------------------------------------------------------------------------------------------------------------------------------------------------------------------------------------------------------------------------------------------------|------------------|------------|
|                                              |                   |                                 |                                   |                     |                  | Meeting minimum PAGAs<br>Yes, vs No                                                                                                                                                                                                                                                       | 0.64 (0.43-0.96) |            |
|                                              |                   |                                 |                                   |                     |                  | Incremental activity categories (PAGAs)<br>High activity vs no weekly recreational physical activity                                                                                                                                                                                      | 0.58 (0.36-0.95) |            |
|                                              |                   |                                 |                                   |                     |                  | <b>Questionnaire four (Q4)</b><br>Administered two years after study enrolment and assessed recreational activity performed in previous 12 months.<br>(Approximately one year after treatment completion)<br>Any regular recreational physical activity<br>(1 session/week)<br>Yes, vs No | 0.61 (0.37-1.02) |            |
|                                              |                   |                                 |                                   |                     |                  | Meeting minimum PAGAs<br>Yes, vs No                                                                                                                                                                                                                                                       | 0.60 (0.31-1.12) |            |
|                                              |                   |                                 |                                   |                     |                  | Incremental activity categories (PAGAs)<br>High activity vs no weekly recreational physical activity                                                                                                                                                                                      | 0.57 (0.26-1.26) |            |

**Supplementary Table 5B Descriptive table of studies included in analyses of recreational physical activity after diagnosis and breast cancer prognosis**

| Author, year, study name, country, WCRF Code | Study description                                                                                             | Time of diagnosis and follow-up | Disease characteristics treatment        | Exposure assessment                                                                                                                                                                                         | Outcome (Events)                        | Contrast                                                                                                               | HR (95% CI)      | Covariates                                                                                                                                                |
|----------------------------------------------|---------------------------------------------------------------------------------------------------------------|---------------------------------|------------------------------------------|-------------------------------------------------------------------------------------------------------------------------------------------------------------------------------------------------------------|-----------------------------------------|------------------------------------------------------------------------------------------------------------------------|------------------|-----------------------------------------------------------------------------------------------------------------------------------------------------------|
| Jung 2019, MARIE study, Germany              | Population-based cohort study of 3813 postmenopausal breast cancer patients<br><br>Age range: 50-74 years old | Median follow-up: 6 years       | Invasive breast cancer or in situ tumour | Leisure time physical activity assessment included self-reported participation in walking and cycling for the purposes of commuting/transportation as well as recreational activities, sports, and fitness. | All-cause mortality (n=148)             | Postdiagnosis physical activity in insufficiently active women pre-diagnosis<br><br>Sufficient activity vs no activity | 0.43 (0.26-0.72) | Age at diagnosis, er/pr status, grade, menopausal hormone therapy use, mode of detection, nodal status, recurrence, study centre, time period, tumor size |
|                                              |                                                                                                               |                                 |                                          |                                                                                                                                                                                                             | Breast cancer specific mortality (n=85) |                                                                                                                        | 0.48 (0.25-0.91) |                                                                                                                                                           |
|                                              |                                                                                                               |                                 |                                          |                                                                                                                                                                                                             | Recurrence (n=226)                      |                                                                                                                        | 0.59 (0.40-0.86) |                                                                                                                                                           |
|                                              |                                                                                                               |                                 |                                          |                                                                                                                                                                                                             | All-cause mortality (n=52)              | Postdiagnosis physical activity in sufficiently active women pre-diagnosis<br><br>Sufficient activity vs no activity   | 0.57 (0.30-1.08) |                                                                                                                                                           |
|                                              |                                                                                                               |                                 |                                          |                                                                                                                                                                                                             | Breast cancer specific mortality (n=29) |                                                                                                                        | 0.59 (0.22-1.64) |                                                                                                                                                           |
|                                              |                                                                                                               |                                 |                                          |                                                                                                                                                                                                             | Recurrence (n=29)                       |                                                                                                                        | 0.65 (0.39-1.09) |                                                                                                                                                           |
|                                              |                                                                                                               |                                 |                                          |                                                                                                                                                                                                             | All-cause mortality (n=206)             | Pre- to postdiagnosis leisure-time physical activity patterns                                                          | 0.75 (0.48-1.15) |                                                                                                                                                           |

**Supplementary Table 5B Descriptive table of studies included in analyses of recreational physical activity after diagnosis and breast cancer prognosis**

| Author, year, study name, country, WCRF Code | Study description                                                                                                                   | Time of diagnosis and follow-up                                                                                                                  | Disease characteristics treatment                                | Exposure assessment                                                                                                                                                                                                                                                                                                                                                                                                                       | Outcome (Events)                                          | Contrast                                                                        | HR (95% CI)                               | Covariates                                                                                                                                                                                                                                                                                                                 |
|----------------------------------------------|-------------------------------------------------------------------------------------------------------------------------------------|--------------------------------------------------------------------------------------------------------------------------------------------------|------------------------------------------------------------------|-------------------------------------------------------------------------------------------------------------------------------------------------------------------------------------------------------------------------------------------------------------------------------------------------------------------------------------------------------------------------------------------------------------------------------------------|-----------------------------------------------------------|---------------------------------------------------------------------------------|-------------------------------------------|----------------------------------------------------------------------------------------------------------------------------------------------------------------------------------------------------------------------------------------------------------------------------------------------------------------------------|
|                                              |                                                                                                                                     |                                                                                                                                                  |                                                                  |                                                                                                                                                                                                                                                                                                                                                                                                                                           | Breast cancer specific mortality (n=114)                  |                                                                                 | 0.61 (0.33-1.13)                          |                                                                                                                                                                                                                                                                                                                            |
|                                              |                                                                                                                                     |                                                                                                                                                  |                                                                  |                                                                                                                                                                                                                                                                                                                                                                                                                                           | Recurrence (n=324)                                        |                                                                                 | 0.80 (0.57-1.14)                          |                                                                                                                                                                                                                                                                                                                            |
| Maliniak 2018, CPS-II Nutrition Cohort, USA  | Population-based cohort study of 5254 post-menopausal women diagnosed with invasive breast cancer<br><br>Age range: 46-92 years old | Diagnosed between 1992-2013<br><br>Median (IQR) follow-up: 13.3 (5.8) for age group: 46-64 and median (IQR): 7.5 (6.8) for age group 65-92 years | Invasive breast cancer:<br><br>Localised (74%)<br>Regional (26%) | Moderate-to-vigorous recreational physical activity was self-reported on the 1992–1993 baseline questionnaire and updated on follow-up questionnaires in 1999 and biennially thereafter except for 2003 and 2013<br><br>Post-diagnosis exposures based on the first questionnaire completed more than two years after diagnosis to allow for completion of treatment at a median time of 3.4 years after diagnosis for physical activity. | All-cause mortality (n=185)<br><br>Age range: 46-64 years | Moderate or vigorous recreational activity<br><br>17.5+ vs. 3.5-8.75 MET-h/week | 0.56<br><br>(0.37-0.83)<br>P trend <0.001 | Age at diagnosis, race, calendar year, Surveillance, Epidemiology, and End Results (SEER) summary stage at diagnosis, post-diagnosis BMI, post-diagnosis number of comorbidities, post-diagnosis uses of hormone replacement therapy, post-diagnosis alcohol intake, post-diagnosis other cancer diagnosis, smoking status |
|                                              |                                                                                                                                     |                                                                                                                                                  |                                                                  |                                                                                                                                                                                                                                                                                                                                                                                                                                           | Per category median                                       | 0.97<br><br>(0.95-0.98)                                                         |                                           |                                                                                                                                                                                                                                                                                                                            |
|                                              |                                                                                                                                     |                                                                                                                                                  |                                                                  | All-cause mortality (n=946)<br><br>Age range: 65-92 years                                                                                                                                                                                                                                                                                                                                                                                 | 17.5+ vs. 3.5-8.75 MET-h/week                             | 0.74<br><br>(0.61-0.90)<br>P trend=0.01                                         |                                           |                                                                                                                                                                                                                                                                                                                            |
|                                              |                                                                                                                                     |                                                                                                                                                  |                                                                  |                                                                                                                                                                                                                                                                                                                                                                                                                                           | Per category median                                       | 0.98<br><br>(0.97-0.99)                                                         |                                           |                                                                                                                                                                                                                                                                                                                            |
|                                              |                                                                                                                                     |                                                                                                                                                  |                                                                  | Breast cancer specific mortality (n=74)<br><br>Age range: 46-64 years                                                                                                                                                                                                                                                                                                                                                                     | 17.5+ vs. 3.5-8.75MET-h/week                              | 0.49<br><br>(0.26-0.95)<br>P trend=0.01                                         |                                           |                                                                                                                                                                                                                                                                                                                            |
|                                              |                                                                                                                                     |                                                                                                                                                  |                                                                  |                                                                                                                                                                                                                                                                                                                                                                                                                                           | Per category median                                       | 0.97<br><br>(0.94-0.99)                                                         |                                           |                                                                                                                                                                                                                                                                                                                            |

**Supplementary Table 5B Descriptive table of studies included in analyses of recreational physical activity after diagnosis and breast cancer prognosis**

| Author, year, study name, country, WCRF Code | Study description                                                   | Time of diagnosis and follow-up                     | Disease characteristics treatment                            | Exposure assessment                                                                                                                                                                                                                  | Outcome (Events)                                                   | Contrast                                                                                                                                                                                                                                                         | HR (95% CI)                                                | Covariates                                                                                                                                                                                                                              |
|----------------------------------------------|---------------------------------------------------------------------|-----------------------------------------------------|--------------------------------------------------------------|--------------------------------------------------------------------------------------------------------------------------------------------------------------------------------------------------------------------------------------|--------------------------------------------------------------------|------------------------------------------------------------------------------------------------------------------------------------------------------------------------------------------------------------------------------------------------------------------|------------------------------------------------------------|-----------------------------------------------------------------------------------------------------------------------------------------------------------------------------------------------------------------------------------------|
|                                              |                                                                     |                                                     |                                                              |                                                                                                                                                                                                                                      | Breast cancer specific mortality (n=192)<br>Age range: 65-92 years | 17.5+ vs. 3.5-8.753MET-h/week<br><br>Per category median                                                                                                                                                                                                         | 1<br>(0.66-1.5)<br>P trend=0.25<br><br>0.99<br>(0.97-1.01) |                                                                                                                                                                                                                                         |
| Palesh 2018, USA                             | Retrospective cohort study of 103 women with advanced breast cancer | Mean follow-up 60.4 months                          | Advanced breast cancer (stage IV) or locally recurrent (n=3) | Women completed the Seven-Day Physical Activity Recall (7DPAR) administered by an interviewer or via self-report<br><br>Composite score that encompasses duration and intensity of a range of physical activities for the past week. | All-cause mortality (n=93)                                         | Per 4 MET-h/day                                                                                                                                                                                                                                                  | 0.91 (0.84 -0.99)                                          | Age, marital status, ER status, treatment, metastases, salivary diurnal cortisol, depression score                                                                                                                                      |
| Tarasenko 2018, NHIS, USA                    | Prospective cohort study of 2285 women with breast cancer           | 1999-2009 followed until 2011                       |                                                              | Interviewed for on weekly frequency and duration of moderate- and vigorous-intensity aerobic and muscle-strengthening activities                                                                                                     | All-cause mortality (n=721)                                        | Sufficiently active (meeting recommendations on aerobic PA (≥150-min weekly session of moderate-intensity PA, or 75-min weekly session of vigorous-intensity PA, or an equivalent combination) vs<br><br>Inactive (≤1 weekly session of aerobic 10-min activity) | 0.61 (0.46-0.81)                                           | Age (continuous), sex, race/ethnicity, education level, marital status, and insurance status, self-rated health, activity limitations, smoking status, BMI categories, number of comorbid conditions, and age at first cancer diagnosis |
| Veal 2017, WISC, USA                         | 1925 women with incident primary DCIS diagnosis reported to the     | Diagnosis 1997-2006<br><br>Mean follow-up 6.7 years | Ductal carcinoma in situ (DCIS)                              | Telephone interview or mailed questionnaire at least 2 years after diagnosis                                                                                                                                                         | All-cause mortality (n=87)                                         | Per 1 hour/week<br><br>>5 vs. 0 hours/week                                                                                                                                                                                                                       | 0.97<br>(0.9-1.06)<br><br>0.85<br>(0.38-1.91)              | Age at diagnosis, family history of breast cancer, education, surgery type, year of diagnosis, post-treatment endocrine therapy use, number of                                                                                          |

**Supplementary Table 5B Descriptive table of studies included in analyses of recreational physical activity after diagnosis and breast cancer prognosis**

| Author, year, study name, country, WCRF Code        | Study description                                                                                                                                | Time of diagnosis and follow-up | Disease characteristics treatment                                                                                                                                                                | Exposure assessment                                                                                                                                                                                                   | Outcome (Events)                                              | Contrast                  | HR (95% CI)                               | Covariates                                                                                                                                                                                                                                                                       |
|-----------------------------------------------------|--------------------------------------------------------------------------------------------------------------------------------------------------|---------------------------------|--------------------------------------------------------------------------------------------------------------------------------------------------------------------------------------------------|-----------------------------------------------------------------------------------------------------------------------------------------------------------------------------------------------------------------------|---------------------------------------------------------------|---------------------------|-------------------------------------------|----------------------------------------------------------------------------------------------------------------------------------------------------------------------------------------------------------------------------------------------------------------------------------|
|                                                     | Wisconsin Cancer Reporting System<br>aged between 20 and 74 years at diagnosis                                                                   |                                 |                                                                                                                                                                                                  |                                                                                                                                                                                                                       | Cardiovascular disease mortality                              | Per 1 hour/week           | 1.04<br>(0.91-1.18)                       | comorbidities, post-menopausal hormone uses BMI, smoking, alcohol, adjusted for pre-diagnosis exposure level as static covariates                                                                                                                                                |
|                                                     |                                                                                                                                                  |                                 |                                                                                                                                                                                                  |                                                                                                                                                                                                                       | >5 vs. 0 hours/week                                           | 2.27<br>(0.40-12.76)      |                                           |                                                                                                                                                                                                                                                                                  |
|                                                     |                                                                                                                                                  |                                 |                                                                                                                                                                                                  |                                                                                                                                                                                                                       | All-cause mortality                                           | Per 1 hour/week           | 1.00<br>(0.89-1.11)                       |                                                                                                                                                                                                                                                                                  |
|                                                     |                                                                                                                                                  |                                 |                                                                                                                                                                                                  |                                                                                                                                                                                                                       | >5 vs. 0 hours/week                                           | 0.92<br>(0.30-2.86)       |                                           |                                                                                                                                                                                                                                                                                  |
| Nechuta, 2016, ABCPP, USA cohorts (LACE, NHS, WHEL) | Pooled analysis of 6596 ER+ breast cancer survivors<br>Age range: 20-83<br>Year of diagnosis, range in the three USA cohorts included: 1990–2004 | Follow-up: 10 years             | Women diagnosed with invasive breast cancer<br>Chemotherapy, n (%)=3,046 (46.2);<br>Radiotherapy, n (%)=4,063 (61.6);<br>Mastectomy, n (%)=3,203 (48.6);<br>Hormonal therapy, n (%)=5,689 (86.3) | LACE: (adapted from the Arizona Activity Frequency Questionnaire)<br>NHS: validated questionnaire WHEL study: used the Women's Health Initiative (WHI) PA Questionnaire, which has been validated using accelerometer | Late recurrence, ≥5 years<br>(n=604)<br>ER positive           | ≥17.4 vs. <4.9 MET-h/week | 0.89<br>(0.73-1.09)<br>P trend=0.27       | Age at diagnosis, TNM stage, PR status, chemotherapy, radiotherapy, Surgery, Hormonal therapy, race/ethnicity, menopausal status, comorbidity, time between exposure measurement and 5-year post-diagnosis date, stratified by study, pre-diagnosis BMI, alcohol intake, smoking |
|                                                     |                                                                                                                                                  |                                 |                                                                                                                                                                                                  |                                                                                                                                                                                                                       | Late all-cause mortality, ≥5 years<br>(n=1209)<br>ER positive |                           | 0.71<br>(0.61-0.82)<br>P trend ≤ 0.0001   |                                                                                                                                                                                                                                                                                  |
|                                                     |                                                                                                                                                  |                                 |                                                                                                                                                                                                  |                                                                                                                                                                                                                       | Early recurrence, <5 years n=383<br>ER positive               |                           | 1.16<br>(0.9-1.49)<br>P trend=0.26        |                                                                                                                                                                                                                                                                                  |
|                                                     |                                                                                                                                                  |                                 |                                                                                                                                                                                                  |                                                                                                                                                                                                                       | Early all-cause mortality, <5 years =218<br>ER positive       |                           | 0.61<br>(0.43-0.88)<br>P Trend=<br>0.0007 |                                                                                                                                                                                                                                                                                  |



**Supplementary Table 5B Descriptive table of studies included in analyses of recreational physical activity after diagnosis and breast cancer prognosis**

| Author, year, study name, country, WCRF Code | Study description                                                                                                                   | Time of diagnosis and follow-up                                                                       | Disease characteristics treatment                                                                                                                                                                                                    | Exposure assessment                                                                                                                                                                                     | Outcome (Events)                                 | Contrast                  | HR (95% CI)                             | Covariates                                                                                                                                              |
|----------------------------------------------|-------------------------------------------------------------------------------------------------------------------------------------|-------------------------------------------------------------------------------------------------------|--------------------------------------------------------------------------------------------------------------------------------------------------------------------------------------------------------------------------------------|---------------------------------------------------------------------------------------------------------------------------------------------------------------------------------------------------------|--------------------------------------------------|---------------------------|-----------------------------------------|---------------------------------------------------------------------------------------------------------------------------------------------------------|
| Ammitzboll 2016, DCH, Denmark                | Population-based cohort study of 959 women diagnosed with breast cancer<br><br>Mean age at diagnosis: 63 years                      | Diagnosed 1993-2011<br><br>Median (IQR) years follow-up: 10 (7)                                       | 780 (81%) ER positive; 29 (3%) unknown 318 (33%) stage I; 352 (37%) stage II; 126 (13%) stage III; 163 (17%) unknown 644 (67%) ≤20mm 101 (11%) chemotherapy; 644 (67%) radiotherapy; 57 (6%) unknown; 470 (49%) anti hormone therapy | Validated questionnaire including recreational exercise (walking, cycling, sports) and household (housework do-it-yourself activities, gardening) assessed on average 3.5 years (IQR 3) after diagnosis | All-cause mortality (n=121)                      | Per 10 MET-h/week         | 0.94<br>(0.86-1.03)                     | Alcohol intake, smoking status, BMI, comorbidity, education, nodal status, operation type, chemotherapy, physical activity, household physical activity |
|                                              |                                                                                                                                     |                                                                                                       |                                                                                                                                                                                                                                      |                                                                                                                                                                                                         | All-cause mortality (n=144)                      | 39-273 vs. 0-8 MET-h/week | 0.75<br>(0.42-1.33)                     |                                                                                                                                                         |
|                                              |                                                                                                                                     |                                                                                                       |                                                                                                                                                                                                                                      |                                                                                                                                                                                                         | Low-high vs. low-low physical activity (n=43)    |                           | 0.75 (0.37-1.52)                        |                                                                                                                                                         |
|                                              |                                                                                                                                     |                                                                                                       |                                                                                                                                                                                                                                      |                                                                                                                                                                                                         | High-high vs. high-low physical activity (n=101) |                           | 0.83 (0.47-1.45)                        |                                                                                                                                                         |
| Jones 2016, LACE and Pathways Studies, USA   | 6211 women with early breast cancer from two population-based, prospective cohort studies<br><br>Age mean: 59.1 (11.7) at diagnosis | LACE diagnosed between 1996-2000<br><br>PATHWAYS diagnosed from 2008 and followed through April, 2015 | Breast cancer (stage I to III) 83.1% ER+; 65.5% PR +; 14.3% HER2+ AJCC stage: 52.8% I, 39.4% II, 7.8% III; 71.3% well or moderately differentiated, 28.7% poor/undifferentiated Surgery: 57.4%                                       | Self-completed Arizona Activity Frequency Questionnaire (validated) assessed exercise in past 6 months (Pathway) and past 12 months (LACE), from 0 to 3.2 years after diagnosis                         | Breast cancer-specific mortality (n=405)         | >25 vs. <2 MET-h/week     | 1.00<br>(0.74-1.34)<br><br>P trend=0.39 | Age at diagnosis, smoking status, BMI, menopausal status, tumour stage, chemotherapy, radiation therapy, trastuzumab, hormonal therapy, comorbidity     |
|                                              |                                                                                                                                     |                                                                                                       |                                                                                                                                                                                                                                      |                                                                                                                                                                                                         | ER negative (n=NA)                               | 0 vs. >0 MET-h/week       | 0.89<br>(0.51-1.55)                     |                                                                                                                                                         |
|                                              |                                                                                                                                     |                                                                                                       |                                                                                                                                                                                                                                      |                                                                                                                                                                                                         | ER positive (n=NA)                               |                           | 0.72<br>(0.53-0.97)                     |                                                                                                                                                         |
|                                              |                                                                                                                                     |                                                                                                       |                                                                                                                                                                                                                                      |                                                                                                                                                                                                         | HER2 negative (n=NA)                             |                           | 0.78<br>(0.59-1.04)                     |                                                                                                                                                         |

**Supplementary Table 5B Descriptive table of studies included in analyses of recreational physical activity after diagnosis and breast cancer prognosis**

| Author, year, study name, country, WCRF Code | Study description | Time of diagnosis and follow-up | Disease characteristics treatment                                                                                                | Exposure assessment | Outcome (Events)                | Contrast               | HR (95% CI)                        | Covariates |
|----------------------------------------------|-------------------|---------------------------------|----------------------------------------------------------------------------------------------------------------------------------|---------------------|---------------------------------|------------------------|------------------------------------|------------|
|                                              |                   |                                 | lumpectomy, 42.3%<br>maastectomy, 0.3% no;<br>Chemotherapy: 49.5% yes;<br>Radiotherapy: 49.7% yes;<br>Tamoxifen or AI: 70.9% yes |                     | HER2+<br>(n=NA)                 |                        | 0.50<br>(0.24-1.01)                |            |
|                                              |                   |                                 |                                                                                                                                  |                     | ER+, PR+ and HER2-<br>(n=NA)    |                        | 0.57<br>(0.37-0.86)                |            |
|                                              |                   |                                 |                                                                                                                                  |                     | ER+ or PR+, PR- HER2+<br>(n=NA) |                        | 0.98<br>(0.62-1.56)                |            |
|                                              |                   |                                 |                                                                                                                                  |                     | ER-, PR-, HER2-<br>(n=NA)       |                        | 1.01<br>(0.54-1.90)                |            |
|                                              |                   |                                 |                                                                                                                                  |                     | ER-, PR-, HER2+<br>(n=NA)       |                        | 0.29<br>(0.05-1.67)                |            |
|                                              |                   |                                 |                                                                                                                                  |                     | HER2-enriched<br>(n=NA)         |                        | 0.65<br>(0.08-5.03)                |            |
|                                              |                   |                                 |                                                                                                                                  |                     | Recurrence<br>(n=678)           | >25 vs. <2 MET-h/week  | 1.01<br>(0.8-1.27)<br>P trend=0.60 |            |
|                                              |                   |                                 |                                                                                                                                  |                     | ER negative<br>(n=NA)           | 0 vs. >0<br>MET-h/week | 0.96<br>(0.61-1.52)                |            |
|                                              |                   |                                 |                                                                                                                                  |                     | ER positive<br>(n=NA)           |                        | 0.88<br>(0.69-1.13)                |            |
|                                              |                   |                                 |                                                                                                                                  |                     | HER2 negative                   |                        | 0.89<br>(0.70-1.12)                |            |
|                                              |                   |                                 |                                                                                                                                  |                     | HER2 positive<br>(n=NA)         |                        | 0.76<br>(0.43-1.33)                |            |
|                                              |                   |                                 |                                                                                                                                  |                     | ER+, PR+ and HER2-<br>(n=NA)    |                        | 0.89<br>(0.71-1.10)                |            |

**Supplementary Table 5B Descriptive table of studies included in analyses of recreational physical activity after diagnosis and breast cancer prognosis**

| Author, year, study name, country, WCRF Code | Study description                                                                                                                                                                       | Time of diagnosis and follow-up                                 | Disease characteristics treatment | Exposure assessment                                       | Outcome (Events)                         | Contrast            | HR (95% CI)         | Covariates                                        |
|----------------------------------------------|-----------------------------------------------------------------------------------------------------------------------------------------------------------------------------------------|-----------------------------------------------------------------|-----------------------------------|-----------------------------------------------------------|------------------------------------------|---------------------|---------------------|---------------------------------------------------|
|                                              |                                                                                                                                                                                         |                                                                 |                                   |                                                           | ER+ or PR+, PR, HER2+<br>(n=NA)          |                     | 0.63<br>(0.45-0.88) |                                                   |
|                                              |                                                                                                                                                                                         |                                                                 |                                   |                                                           | ER-, PR-, HER2-<br>(n=NA)                |                     | 1.32<br>(0.90-1.96) |                                                   |
|                                              |                                                                                                                                                                                         |                                                                 |                                   |                                                           | ER-, PR-, HER2+<br>(n=NA)                |                     | 0.81<br>(0.25-2.64) |                                                   |
| Bradshaw 2014, LIBCSP, USA (New York)        | Population-based cohort study of 1423 women diagnosed with in situ or invasive breast cancer<br><br>Age range: 25 to 91 years old<br><br>Pre and postmenopausal (mainly postmenopausal) | Diagnosed between 1996-1997<br><br>Median follow up: 12.7 years |                                   | Structured interviews (more than 2 years after diagnosis) | All-cause mortality (n=420)              | ≥9 vs. 0 MET-h/week | 0.37<br>(0.25-0.55) | Age, pre-diagnosis BMI, chemotherapy, tumour size |
|                                              |                                                                                                                                                                                         |                                                                 |                                   |                                                           | ER- or PR- (n=NA)                        |                     | 0.46<br>(0.29-0.70) |                                                   |
|                                              |                                                                                                                                                                                         |                                                                 |                                   |                                                           | ER+ and PR+ (n=NA)                       |                     | 0.25<br>(0.14-0.42) |                                                   |
|                                              |                                                                                                                                                                                         |                                                                 |                                   |                                                           | BMI<25 kg/m <sup>2</sup> (n=NA)          |                     | 0.24 (0.13-0.42)    |                                                   |
|                                              |                                                                                                                                                                                         |                                                                 |                                   |                                                           | BMI>25 kg/m <sup>2</sup> (n=NA)          |                     | 0.43 (0.26-0.69)    |                                                   |
|                                              |                                                                                                                                                                                         |                                                                 |                                   |                                                           | Breast cancer-specific mortality (n=195) | ≥9 vs. 0 MET-h/week | 0.30<br>(0.16-0.56) |                                                   |
|                                              |                                                                                                                                                                                         |                                                                 |                                   |                                                           | BMI<25 kg/m <sup>2</sup> (n=NA)          |                     | 0.18 (0.08-0.42)    |                                                   |
|                                              |                                                                                                                                                                                         |                                                                 |                                   |                                                           | BMI>25 kg/m <sup>2</sup> (n=NA)          |                     | 0.33 (0.16-0.65)    |                                                   |

**Supplementary Table 5B Descriptive table of studies included in analyses of recreational physical activity after diagnosis and breast cancer prognosis**

| Author, year, study name, country, WCRF Code                                                | Study description                                                                         | Time of diagnosis and follow-up | Disease characteristics treatment                                                    | Exposure assessment                                                                                                            | Outcome (Events)                        | Contrast                       | HR (95% CI)                         | Covariates                                                                  |
|---------------------------------------------------------------------------------------------|-------------------------------------------------------------------------------------------|---------------------------------|--------------------------------------------------------------------------------------|--------------------------------------------------------------------------------------------------------------------------------|-----------------------------------------|--------------------------------|-------------------------------------|-----------------------------------------------------------------------------|
|                                                                                             |                                                                                           |                                 |                                                                                      |                                                                                                                                | ER- or PR- (n=NA)                       |                                | 0.38<br>(0.19-0.72)                 |                                                                             |
|                                                                                             |                                                                                           |                                 |                                                                                      |                                                                                                                                | ER+ and PR+ (n=NA)                      |                                | 0.18<br>(0.08-0.36)                 |                                                                             |
| de Glas 2014, TEAM-L side study of an open label randomized controlled trial, multi-country | Prospective cohort of 521 postmenopausal hormone receptor-positive breast cancer patients | Follow up: 8 years              | ER+98.1%; ER-: 1.7%;<br>PR+:67.0%;<br>PR-:23.0%<br>Grade: 1 16.6%;<br>2: 46.5%; 3/4: | Validated questionnaire,<br><br>Two years after diagnosis. Note: The number of hours spent on physical activity one year after | All-cause mortality (n=58)              | 65.6-258 vs. 0-21.0 MET-h/week | 0.57<br>(0.26-1.40)<br>P trend=0.34 | Age, number of comorbidities, tumour stage, nodal status, BMI, chemotherapy |
|                                                                                             |                                                                                           |                                 |                                                                                      |                                                                                                                                | Breast cancer-specific mortality (n=39) | 65.6-258 vs. 0-21.0 MET-h/week | 0.77<br>(0.28-2.12)<br>P trend=0.95 |                                                                             |

**Supplementary Table 5B Descriptive table of studies included in analyses of recreational physical activity after diagnosis and breast cancer prognosis**

| Author, year, study name, country, WCRF Code | Study description                   | Time of diagnosis and follow-up | Disease characteristics treatment                                                                                                                                                                                                                                                                                                                                                                                                              | Exposure assessment                                                                                                                                                                                                | Outcome (Events)                                                                                     | Contrast                       | HR (95% CI)                                      | Covariates |
|----------------------------------------------|-------------------------------------|---------------------------------|------------------------------------------------------------------------------------------------------------------------------------------------------------------------------------------------------------------------------------------------------------------------------------------------------------------------------------------------------------------------------------------------------------------------------------------------|--------------------------------------------------------------------------------------------------------------------------------------------------------------------------------------------------------------------|------------------------------------------------------------------------------------------------------|--------------------------------|--------------------------------------------------|------------|
|                                              | Median age 63.6 years (range 44-88) |                                 | <p>34.5%; unknown 2.4%.</p> <p>Tumour stage: T1/in situ: 48.9%; T2: 44.5%; T3: 3.8%; T4:2.1%TherapyNo resection:0.2%; Wide local excision: 49.1%; Mastectomy: 50.3%; Unknown: 0.4%</p> <p>Most extensive axillary surgery: sentinel node: 22.5%; axillary lymph node dissection: 76.4%; Radiotherapy: 65.3%; Unknown: 1.3% Chemotherapy: 35.9%</p> <p>Endocrine therapy: tamoxifen followed by exemestane: 50.5%; exemestane alone: 49.5%.</p> | the diagnosis (T1) could be affected by breast cancer treatment during this period, the effect of postdiagnosis physical activity was assessed on the basis of physical activity 2 years after the diagnosis (T2). | <p>Recurrence-free (n=58)</p> <p>(Definition includes disease recurrence or breast cancer death)</p> | 65.6-258 vs. 0-21.0 MET-h/week | <p>0.9</p> <p>(0.39-2.1)</p> <p>P trend=0.79</p> |            |

**Supplementary Table 5B Descriptive table of studies included in analyses of recreational physical activity after diagnosis and breast cancer prognosis**

| Author, year, study name, country, WCRF Code        | Study description                                                                                                                                   | Time of diagnosis and follow-up                                            | Disease characteristics treatment                                           | Exposure assessment                                                                                                                                                                                                                                                                                                                                                                               | Outcome (Events)                                                                                                      | Contrast                                                                                                               | HR (95% CI)                                                                                                                       | Covariates                                                                                                                   |
|-----------------------------------------------------|-----------------------------------------------------------------------------------------------------------------------------------------------------|----------------------------------------------------------------------------|-----------------------------------------------------------------------------|---------------------------------------------------------------------------------------------------------------------------------------------------------------------------------------------------------------------------------------------------------------------------------------------------------------------------------------------------------------------------------------------------|-----------------------------------------------------------------------------------------------------------------------|------------------------------------------------------------------------------------------------------------------------|-----------------------------------------------------------------------------------------------------------------------------------|------------------------------------------------------------------------------------------------------------------------------|
| Williams PT, 2014, NRWHS, USA                       | Population-based study<br>(n= 986)<br>Pre- and postmenopausal runners (n= 272) or walkers<br>(n= 714)<br>Caucasian<br>90.35%-100%                   | Recruited:<br>1998-2001<br>Follow up= 9.1 years<br>46 breast cancer deaths | Self-reported breast cancer, no other clinical and pathological information | Questionnaire for height and weight (Self-reported)                                                                                                                                                                                                                                                                                                                                               | Breast cancer-specific mortality<br>Runners: (n=13)<br><br>Walkers: (n=33)                                            | >3.6 vs <1.07 MET-hours/day<br><br>(Equivalent to >=25.1 vs <7.5 MET-h/week)                                           | Runners:<br>0.047 (0.002-0.29)<br><br>Walkers:<br>1.125 (0.305-3.427)                                                             | Age, race, family history of breast cancer, menopause and duration of breastfeeding and oral contraceptive use, education    |
| Beasley 2012, ABCPP<br><br>(LACE, NHS, WHEL, SBCCS) | Pooled analysis of four prospective cohorts (three US and one Chinese) of 13302 breast cancer survivors<br><br>Calendar year: Recruitment 1976-2006 |                                                                            | Invasive TNM stage I-III                                                    | Questionnaire, a median of 23 months post-diagnosis (IQR 18-32 months)<br><br>LACE: (adapted from the Arizona<br><br>Activity Frequency Questionnaire)<br><br>NHS: validated questionnaire<br><br>SBCSS: validated PA questionnaire during in-person interviews<br><br>WHEL study: used the<br><br>Women's Health Initiative (WHI) PA Questionnaire, which has been validated using accelerometer | All-cause mortality (n=1468)<br><br>Breast cancer-specific mortality (n=971)<br><br>Breast cancer recurrence (n=1421) | 29.7-48.0 vs. 0-0.2 MET-hours/week<br><br>29.7-48.0 vs. 0-0.2 MET-hours/week<br><br>29.7-48.0 vs. 0-0.2 MET-hours/week | 0.60 (0.51 - 0.72)<br>P trend≤ 0.0001<br><br>0.73 (0.59 - 0.91)<br>P trend=0.0001<br><br>0.95<br>(0.8 - 1.14)<br><br>P trend=0.60 | Age at diagnosis, race, menopausal status, TNM stage, hormone receptor status, treatment, post-diagnosis BMI, smoking status |
| Bertram 2011, WHEL, USA                             | Follow up of a randomised controlled trial of dietary                                                                                               | Median (range) years follow up: 7.1 (1.0-10.8)                             | Invasive breast cancer: 40.5% stage I, 32.8% stage IIA, 12.4%               | Validated questionnaire at the time of enrolment into the trial and at various                                                                                                                                                                                                                                                                                                                    | All-cause mortality (n=163)                                                                                           | Per 1 unit / MET-h/week                                                                                                | 0.98<br>(0.96-0.99)<br><br>P=0.003                                                                                                | Age at randomization, race, fruit and vegetable consumption, BMI at randomization, menopausal status, tumour type, tumour    |

**Supplementary Table 5B Descriptive table of studies included in analyses of recreational physical activity after diagnosis and breast cancer prognosis**

| Author, year, study name, country, WCRF Code | Study description                                                                                                                                                   | Time of diagnosis and follow-up                        | Disease characteristics treatment                                                                   | Exposure assessment                                                                                        | Outcome (Events)                                    | Contrast                                                                  | HR (95% CI)                          | Covariates                                                                                                                                                        |
|----------------------------------------------|---------------------------------------------------------------------------------------------------------------------------------------------------------------------|--------------------------------------------------------|-----------------------------------------------------------------------------------------------------|------------------------------------------------------------------------------------------------------------|-----------------------------------------------------|---------------------------------------------------------------------------|--------------------------------------|-------------------------------------------------------------------------------------------------------------------------------------------------------------------|
|                                              | intervention of 2361 post-treatment pre and post-menopausal breast cancer survivors (Stage I-III)<br><br>Study recruitment: 1995-2000 and follow up until June 2006 |                                                        | stage IIB, 11.3% stage IIIA, 3.0% stage IIIC 68.2% chemotherapy, 61.6% radiation                    | follow-up points using a 9-item physical activity measure adapted from the Women's Health Initiative (WHI) |                                                     | 24.7-107 vs. 0-2.5 MET-h/week                                             | 0.47<br>(0.26-0.84)<br>P trend=0.08  | grade, tumour stage, anti-oestrogen use, clinical site, time from diagnosis to randomization, hot flashes, and study group                                        |
|                                              |                                                                                                                                                                     |                                                        |                                                                                                     |                                                                                                            | Additional breast cancer events<br>(n=295)          | Per 1 MET-h/week                                                          | 0.99<br>(0.99-1.00)<br>P trend= 0.21 |                                                                                                                                                                   |
|                                              |                                                                                                                                                                     |                                                        |                                                                                                     |                                                                                                            |                                                     | 24.7-107 vs. 0-2.5 MET-h/week                                             | 0.74<br>(0.50-1.10)<br>P trend=0.58  |                                                                                                                                                                   |
|                                              |                                                                                                                                                                     |                                                        |                                                                                                     |                                                                                                            | Change in meeting physical activity guidelines      | Not meeting guidelines vs. change to meet the guidelines of 10 MET-h/week | 1.22 (0.81-1.83)                     |                                                                                                                                                                   |
|                                              |                                                                                                                                                                     |                                                        |                                                                                                     |                                                                                                            | All-cause mortality<br>(n=163)                      | 22.9-107 vs. 0-1.3 MET-h/week                                             | 0.39<br>(0.21-0.72)<br>P trend=0.02  |                                                                                                                                                                   |
|                                              |                                                                                                                                                                     |                                                        |                                                                                                     |                                                                                                            |                                                     | Moderate to Vigorous intensity physical activity                          |                                      |                                                                                                                                                                   |
|                                              |                                                                                                                                                                     |                                                        |                                                                                                     |                                                                                                            | Physical activity change from pre to post diagnosis |                                                                           | 0.89 (0.49-1.64)                     |                                                                                                                                                                   |
|                                              |                                                                                                                                                                     |                                                        |                                                                                                     |                                                                                                            | Change in meeting physical activity guidelines      | Not meeting guidelines vs. change to meet the guidelines of 10 MET-h/week | 1.04 (0.61-1.77)                     |                                                                                                                                                                   |
| Chen 2011, SBCSS, China                      | Prospective cohort of 4826 pre and post-menopausal breast cancer survivors diagnosed with                                                                           | Diagnosed 2002-2006<br><br>Median follow up: 4.3 years | 51.2% ER+/PR+, 26.9% ER-/PR-, 20.2% ER/PR mixed, 1.8% ER/PR unknown<br>TNM stages: 37.2% 0-I, 33.1% | Validated PA questionnaire during in-person interviews 36 months post diagnosis                            | All-cause mortality (n=436)                         | ≥8.3 vs. 0 MET-h/week                                                     | 0.65<br>(0.51-0.84)<br>P trend<0.001 | Date of birth, BMI, WHR, menopausal status, income, education, quality of life, cruciferous vegetables, soy protein, tea consumption, chemotherapy, radiotherapy, |
|                                              |                                                                                                                                                                     |                                                        |                                                                                                     |                                                                                                            | BMI<25 kg/m <sup>2</sup><br>(n=267)                 |                                                                           | 0.62 (0.45-0.85)<br>P trend=0.002    |                                                                                                                                                                   |

**Supplementary Table 5B Descriptive table of studies included in analyses of recreational physical activity after diagnosis and breast cancer prognosis**

| Author, year, study name, country, WCRF Code | Study description                                 | Time of diagnosis and follow-up | Disease characteristics treatment                                                                                                                                                                                                                                                         | Exposure assessment                                | Outcome (Events)                           | Contrast | HR (95% CI)                          | Covariates                          |
|----------------------------------------------|---------------------------------------------------|---------------------------------|-------------------------------------------------------------------------------------------------------------------------------------------------------------------------------------------------------------------------------------------------------------------------------------------|----------------------------------------------------|--------------------------------------------|----------|--------------------------------------|-------------------------------------|
|                                              | stage I to III breast cancer<br><br>Mean age:53.5 |                                 | IIA, 16.6% IIB, 8.7% III-IV, 4.4% unknown Surgery: 94.3% mastectomy, 2.7% conservation surgery, 2.7% unknown type, 0.3% no surgery; Chemotherapy: 91% yes, 9% no; Tamoxifen use: 66.3% yes, 33.7% no; Radiotherapy: 31.2% yes, 68.8% no; Immunotherapy: 14.9% yes, 84.8% no, 0.2% unknown | (60-month post diagnosis interviews still ongoing) | BMI>25 kg/m <sup>2</sup> (n=169)           |          | 0.70 (0.46-1.05)<br>P trend=0.027    | tamoxifen use, TNM stage, ER status |
|                                              |                                                   |                                 |                                                                                                                                                                                                                                                                                           |                                                    | Postmenopausal only (n=250)                |          | 0.55<br>(0.40-0.77)<br>P trend<0.001 |                                     |
|                                              |                                                   |                                 |                                                                                                                                                                                                                                                                                           |                                                    | Premenopausal only (n=186)                 |          | 0.86<br>(0.58-1.26)<br>P trend=0.317 |                                     |
|                                              |                                                   |                                 |                                                                                                                                                                                                                                                                                           |                                                    | ER+ PR+ (n=161)                            |          | 1.32<br>(0.83-2.12)<br>P trend=0.935 |                                     |
|                                              |                                                   |                                 |                                                                                                                                                                                                                                                                                           |                                                    | ER- PR- (n=171)                            |          | 0.4<br>(0.29-0.59)<br>P <0.001       |                                     |
|                                              |                                                   |                                 |                                                                                                                                                                                                                                                                                           |                                                    | ER+PR-/ER-PR+ (87)                         |          | 0.67<br>(0.36-1.22)<br>0.051         |                                     |
|                                              |                                                   |                                 |                                                                                                                                                                                                                                                                                           |                                                    | Relapse/Disease specific mortality (n=450) |          | 0.72<br>(0.57-0.93)<br>P trend=0.324 |                                     |
|                                              |                                                   |                                 |                                                                                                                                                                                                                                                                                           |                                                    | ER+ PR+ (n=189)                            |          | 0.79 (0.53-1.19)<br>P trend=0.540    |                                     |
|                                              |                                                   |                                 |                                                                                                                                                                                                                                                                                           |                                                    | ER- PR- (n=155)                            |          | 0.36 (0.24-0.56)<br>P trend=0.002    |                                     |
|                                              |                                                   |                                 |                                                                                                                                                                                                                                                                                           |                                                    | ER+PR-/ER-PR+ (94)                         |          | 0.51 (0.27-1.00)<br>p-trend=0.166    |                                     |



**Supplementary Table 5B Descriptive table of studies included in analyses of recreational physical activity after diagnosis and breast cancer prognosis**

| Author, year, study name, country, WCRF Code | Study description                                                                                                                     | Time of diagnosis and follow-up                                                                            | Disease characteristics treatment                                                                         | Exposure assessment                                                                                                                                                                                                                                                                                                            | Outcome (Events)                              | Contrast            | HR (95% CI)                           | Covariates                                                                                                        |
|----------------------------------------------|---------------------------------------------------------------------------------------------------------------------------------------|------------------------------------------------------------------------------------------------------------|-----------------------------------------------------------------------------------------------------------|--------------------------------------------------------------------------------------------------------------------------------------------------------------------------------------------------------------------------------------------------------------------------------------------------------------------------------|-----------------------------------------------|---------------------|---------------------------------------|-------------------------------------------------------------------------------------------------------------------|
| Irwin 2011, WHI, USA                         | Population based prospective cohort of 4643 post-menopausal women with invasive breast cancer diagnosis<br><br>Age range: 50-79 years | Diagnosed 1993-1998<br><br>Mean (SD) follow up from post-diagnosis physical activity assessment: 3.3 (1.8) | Invasive:4643<br>Stages I-III<br>Chemotherapy: 25% yes among stage I, 78% yes among stage II/III patients | Questionnaire:<br>Average time from breast cancer diagnosis to post diagnosis physical activity assessment was 1.8 years<br><br>Validity of the physical activity questionnaire was examined by comparing the questionnaire with accelerometer data (r=0.73, and 100% sensitivity for meeting the physical activity guidelines | All-cause mortality (n=186)                   | >9 vs. 0 MET-h/week | 0.54<br>(0.38-0.79)<br>P trend=0.0014 | Age, ethnicity, study group, HRT, BMI, diabetes, alcohol intake, smoking, energy, fruit and vegetable consumption |
|                                              |                                                                                                                                       |                                                                                                            |                                                                                                           |                                                                                                                                                                                                                                                                                                                                | BMI<25 kg/m <sup>2</sup> (n=64)               | >0 vs. 0 MET-h/week | 0.49 (0.27-0.91)                      |                                                                                                                   |
|                                              |                                                                                                                                       |                                                                                                            |                                                                                                           |                                                                                                                                                                                                                                                                                                                                | BMI 25-29.9 kg/m <sup>2</sup> (n=55)          |                     | 0.43 (0.24-0.76)                      |                                                                                                                   |
|                                              |                                                                                                                                       |                                                                                                            |                                                                                                           |                                                                                                                                                                                                                                                                                                                                | BMI≥30 kg/m <sup>2</sup> (n=63)               |                     | 0.80 (0.45-1.41)                      |                                                                                                                   |
|                                              |                                                                                                                                       |                                                                                                            |                                                                                                           |                                                                                                                                                                                                                                                                                                                                | ER-negative (n=37)                            | >0 vs. 0 MET-h/week | 0.78<br>(0.35-1.73)                   |                                                                                                                   |
|                                              |                                                                                                                                       |                                                                                                            |                                                                                                           |                                                                                                                                                                                                                                                                                                                                | ER-positive (n=121)                           |                     | 0.50<br>(0.34-0.74)                   |                                                                                                                   |
|                                              |                                                                                                                                       |                                                                                                            |                                                                                                           |                                                                                                                                                                                                                                                                                                                                | HER2-positive (n=16)                          |                     | 0.71<br>(0.16-3.11)                   |                                                                                                                   |
|                                              |                                                                                                                                       |                                                                                                            |                                                                                                           |                                                                                                                                                                                                                                                                                                                                | HER2-negative (n=40)                          |                     | 0.37<br>(0.19-0.75)                   |                                                                                                                   |
|                                              |                                                                                                                                       |                                                                                                            |                                                                                                           |                                                                                                                                                                                                                                                                                                                                | Increased/maintained physical activity (n=69) | >9 vs. 0 MET-h/week | 0.67 (0.46-0.96)                      |                                                                                                                   |
|                                              |                                                                                                                                       |                                                                                                            |                                                                                                           |                                                                                                                                                                                                                                                                                                                                | Decreased/inactive physical activity (n=53)   | <9 MET-h/week       | 1.06 (0.73-1.54)                      |                                                                                                                   |

**Supplementary Table 5B Descriptive table of studies included in analyses of recreational physical activity after diagnosis and breast cancer prognosis**

| Author, year, study name, country, WCRF Code | Study description                                                                                                     | Time of diagnosis and follow-up                     | Disease characteristics treatment                                                                                                                                                                         | Exposure assessment                                                                                                                                                                                                     | Outcome (Events)                              | Contrast                                                                                                                                                                                       | HR (95% CI)                                                                                               | Covariates                                                                                                                                                       |
|----------------------------------------------|-----------------------------------------------------------------------------------------------------------------------|-----------------------------------------------------|-----------------------------------------------------------------------------------------------------------------------------------------------------------------------------------------------------------|-------------------------------------------------------------------------------------------------------------------------------------------------------------------------------------------------------------------------|-----------------------------------------------|------------------------------------------------------------------------------------------------------------------------------------------------------------------------------------------------|-----------------------------------------------------------------------------------------------------------|------------------------------------------------------------------------------------------------------------------------------------------------------------------|
|                                              |                                                                                                                       |                                                     |                                                                                                                                                                                                           |                                                                                                                                                                                                                         | Breast cancer-specific mortality (n=86)       | >9 vs. 0 MET-hours/week<br>Moderate to Vigorous physical activity                                                                                                                              | 0.61<br>(0.35 - 0.99)<br>P trend=0.049                                                                    |                                                                                                                                                                  |
|                                              |                                                                                                                       |                                                     |                                                                                                                                                                                                           |                                                                                                                                                                                                                         | All-cause mortality (n=186)                   | >9 vs. 0 MET-hours/week<br>Moderate-intensity physical activity                                                                                                                                | 0.62<br>(0.41 - 0.93)<br>P trend=0.020                                                                    | Age, ethnicity, study group, HRT, BMI, diabetes, alcohol intake, smoking, energy, fruit and vegetable consumption, *also adjusted for vigorous physical activity |
|                                              |                                                                                                                       |                                                     |                                                                                                                                                                                                           |                                                                                                                                                                                                                         | Breast cancer-specific mortality (n=86)       |                                                                                                                                                                                                | 0.66<br>(0.36-1.21)<br>P trend=0.18                                                                       |                                                                                                                                                                  |
|                                              |                                                                                                                       |                                                     |                                                                                                                                                                                                           |                                                                                                                                                                                                                         | Increased/maintained physical activity (n=32) | >9 vs. 0 MET-h/week                                                                                                                                                                            | 0.91 (0.51-1.64)                                                                                          |                                                                                                                                                                  |
|                                              |                                                                                                                       |                                                     |                                                                                                                                                                                                           |                                                                                                                                                                                                                         | Decreased/inactive physical activity (n=22)   | <9 MET-h/week                                                                                                                                                                                  | 1.06 (0.59-1.88)                                                                                          |                                                                                                                                                                  |
|                                              |                                                                                                                       |                                                     |                                                                                                                                                                                                           |                                                                                                                                                                                                                         |                                               |                                                                                                                                                                                                |                                                                                                           |                                                                                                                                                                  |
| Sternfeld 2009, LACE, USA                    | Prospective cohort study of 1970 pre and postmenopausal breast cancer survivors.<br><br>Age range: 18 to 79 years old | Diagnosed 1997-2000<br><br>Mean follow up=87 months | Among those with data: 68.2% ER+/PR+, 14.2% ER+/PR-, 1.8% ER-/PR+, 15.8% ER-/PR- Early-stage breast cancer; AJCC; among those with data: 47.6% stage I, 33.4% stage IIa, 16.0% stage IIb, 2.9% stage IIIa | Self-Report via a questionnaire mailed to participants semi-annually until April 2006 and annually thereafter.<br><br>The questionnaire based on the Arizona Activity Frequency questionnaire, which has been validated | All-cause mortality (n=187)                   | Selected recreational activities ≥9 vs. <9 MET-h/week<br><br>≥27 vs. <5.3 MET-h/week<br>Moderate to vigorous physical activity<br><br>≥6 vs. <1 h/week<br>Moderate intensity physical activity | 0.98<br>(0.71-1.35)<br><br>0.74<br>(0.49-1.13)<br>P trend=0.06<br><br>0.66<br>(0.42-1.03)<br>P trend=0.04 | Age, number of positive nodes, stage, weight at 18 years old, education level and smoking status                                                                 |

**Supplementary Table 5B Descriptive table of studies included in analyses of recreational physical activity after diagnosis and breast cancer prognosis**

| Author, year, study name, country, WCRF Code | Study description | Time of diagnosis and follow-up | Disease characteristics treatment                                                                                  | Exposure assessment           | Outcome (Events) | Contrast                                                         | HR (95% CI)                                                                 | Covariates |                                     |                                                                                                                                                         |
|----------------------------------------------|-------------------|---------------------------------|--------------------------------------------------------------------------------------------------------------------|-------------------------------|------------------|------------------------------------------------------------------|-----------------------------------------------------------------------------|------------|-------------------------------------|---------------------------------------------------------------------------------------------------------------------------------------------------------|
|                                              |                   |                                 | Among those with data: Surgery: 50.4% conserving, 49.6% mastectomy; Chemotherapy: 56.3%, Radiation therapy: 62.9 % | against doubly labelled water |                  | ≥1 vs. ≤ 0 h/week<br>Vigorous intensity physical activity        | 1.02<br>(0.70-1.47)                                                         |            |                                     |                                                                                                                                                         |
|                                              |                   |                                 |                                                                                                                    |                               |                  | >6 vs. <1 hours/week<br>of moderate physical activity<br>ER- PR- | 0.75 (0.36-1.59)<br>P trend=0.69                                            |            |                                     |                                                                                                                                                         |
|                                              |                   |                                 |                                                                                                                    |                               |                  | >6 vs. <1 hours/week of moderate physical activity<br>ER+ PR+    | 0.59 (0.34-1.04)<br>P trend=0.01                                            |            |                                     |                                                                                                                                                         |
|                                              |                   |                                 |                                                                                                                    |                               |                  | BMI<25 kg/m <sup>2</sup><br>(n=NA)                               | 0.38 (0.17-0.85)                                                            |            |                                     |                                                                                                                                                         |
|                                              |                   |                                 |                                                                                                                    |                               |                  | BMI 25-29.9 kg/m <sup>2</sup><br>(n=NA)                          | 0.95 (0.47-1.94)                                                            |            |                                     |                                                                                                                                                         |
|                                              |                   |                                 |                                                                                                                    |                               |                  | BMI≥30 kg/m <sup>2</sup><br>(n=NA)                               | 0.90 (0.38-2.16)                                                            |            |                                     |                                                                                                                                                         |
|                                              |                   |                                 |                                                                                                                    |                               |                  | Breast cancer specific mortality (n=102)                         | Selected recreational activities ≥9 vs. <9 MET-h/week                       |            | 1.19<br>(0.78-1.84)                 | Age, number of positive nodes, stage, weight at 18 years old, type of treatment (chemotherapy/radiation) and type of surgery (mastectomy or conserving) |
|                                              |                   |                                 |                                                                                                                    |                               |                  |                                                                  | ≥27 vs. <5.3 MET-h/week<br>Moderate to vigorous intensity physical activity |            | 0.90 (0.51-1.58)<br>P trend=0.38    |                                                                                                                                                         |
|                                              |                   |                                 |                                                                                                                    |                               |                  |                                                                  | ≥6 vs. <1 h/week<br>Moderate intensity physical activity                    |            | 0.73<br>(0.40-1.33)<br>P trend=0.26 |                                                                                                                                                         |
|                                              |                   |                                 |                                                                                                                    |                               |                  |                                                                  | ≥1 vs. ≤ 0 h/week<br>Vigorous intensity physical activity                   |            | 1.10<br>(0.68-1.80)<br>P trend=0.82 |                                                                                                                                                         |

**Supplementary Table 5B Descriptive table of studies included in analyses of recreational physical activity after diagnosis and breast cancer prognosis**

| Author, year, study name, country, WCRF Code | Study description                                                                                | Time of diagnosis and follow-up         | Disease characteristics treatment                   | Exposure assessment                                                                                               | Outcome (Events)                                                                                                              | Contrast                                                        | HR (95% CI)                          | Covariates                                                                                                                                                                                        |
|----------------------------------------------|--------------------------------------------------------------------------------------------------|-----------------------------------------|-----------------------------------------------------|-------------------------------------------------------------------------------------------------------------------|-------------------------------------------------------------------------------------------------------------------------------|-----------------------------------------------------------------|--------------------------------------|---------------------------------------------------------------------------------------------------------------------------------------------------------------------------------------------------|
|                                              |                                                                                                  |                                         |                                                     |                                                                                                                   | Recurrence (n=225)<br>(Definition includes: Local, regional, or distant recurrence or metastasis or death from breast cancer) | Selected recreational activities ≥9 vs. <9 MET-h/week           | 1.16<br>(0.87-1.55)                  | Age, number of positive nodes, stage, and weight at 18 years old                                                                                                                                  |
|                                              |                                                                                                  |                                         |                                                     |                                                                                                                   | ≥27 vs. <5.3 MET-h/week<br>Moderate to vigorous intensity physical activity                                                   | 1.00<br>(0.68-1.46)                                             |                                      |                                                                                                                                                                                                   |
|                                              |                                                                                                  |                                         |                                                     |                                                                                                                   | ≥6 vs. <1 h/week<br>Moderate intensity physical activity                                                                      | 0.81<br>(0.54-1.22)                                             |                                      |                                                                                                                                                                                                   |
|                                              |                                                                                                  |                                         |                                                     |                                                                                                                   | ≥1 vs. ≤ 0 h/week<br>Vigorous intensity physical activity                                                                     | 1.12<br>(0.81-1.56)                                             |                                      |                                                                                                                                                                                                   |
|                                              |                                                                                                  |                                         |                                                     |                                                                                                                   |                                                                                                                               |                                                                 |                                      |                                                                                                                                                                                                   |
| Holick, 2008, CWLS USA                       | Prospective cohort of 4482 pre- and post-menopausal breast cancer survivors<br><br>Mean age:58.5 | Diagnosed 1988-2001 Follow up=5.5 years | Invasive breast cancer: 72.6% local, 27.4% regional | Questionnaire median of 5.6 years after diagnosis. Validity of the physical activity assessment has been reported | All-cause mortality (n=412)                                                                                                   | ≥21 vs. <2.8 MET-h/week                                         | 0.44<br>(0.32-0.61)<br>P trend=0.001 | Age at diagnosis, tumour stage, Residency at diagnosis, time from diagnosis to exposure assessment, BMI, menopausal status, hormonal therapy, energy intake, education, family history, treatment |
|                                              |                                                                                                  |                                         |                                                     |                                                                                                                   | Breast cancer-specific mortality (n=109)                                                                                      | ≥21 vs. <2.8 MET-h/week                                         | 0.49<br>(0.27-0.89)<br>P trend=0.05  |                                                                                                                                                                                                   |
|                                              |                                                                                                  |                                         |                                                     |                                                                                                                   | BMI<25 kg/m <sup>2</sup> (n=26)                                                                                               | ≥8 vs. <8 MET-h/week                                            | 0.91 (0.39-2.13)                     |                                                                                                                                                                                                   |
|                                              |                                                                                                  |                                         |                                                     |                                                                                                                   | BMI≥25 kg/m <sup>2</sup> (n=75)                                                                                               |                                                                 | 0.63 (0.39-1.02)                     |                                                                                                                                                                                                   |
|                                              |                                                                                                  |                                         |                                                     |                                                                                                                   | All-cause mortality (n=412)<br>*excluding women who died 1y after assessing exposure                                          | ≥10.3 vs. <2 MET-h/week<br>Moderate-intensity physical activity | 0.47<br>(0.34-0.65)<br>P trend=0.001 | Age at diagnosis, tumour stage, residency at diagnosis, time from diagnosis to exposure assessment, BMI, menopausal status, hormonal therapy, energy intake, education, family                    |

**Supplementary Table 5B Descriptive table of studies included in analyses of recreational physical activity after diagnosis and breast cancer prognosis**

| Author, year, study name, country, WCRF Code | Study description                                                                                                                                                                                    | Time of diagnosis and follow-up                                       | Disease characteristics treatment       | Exposure assessment                                                                                                                         | Outcome (Events)                                                                                  | Contrast                                                            | HR (95% CI)                         | Covariates                                                                                                                                                                                                                    |
|----------------------------------------------|------------------------------------------------------------------------------------------------------------------------------------------------------------------------------------------------------|-----------------------------------------------------------------------|-----------------------------------------|---------------------------------------------------------------------------------------------------------------------------------------------|---------------------------------------------------------------------------------------------------|---------------------------------------------------------------------|-------------------------------------|-------------------------------------------------------------------------------------------------------------------------------------------------------------------------------------------------------------------------------|
|                                              |                                                                                                                                                                                                      |                                                                       |                                         |                                                                                                                                             | Breast cancer-specific mortality (n=109)<br>*excluding women who died 1y after assessing exposure |                                                                     | 0.47<br>(0.26-0.86)<br>P trend=0.03 | history, treatment, vigorous physical activity                                                                                                                                                                                |
|                                              |                                                                                                                                                                                                      |                                                                       |                                         |                                                                                                                                             | All-cause mortality (n=412)<br>*excluding women who died 1y after assessing exposure              | ≥15.1 vs. <0 MET-h/week<br><br>Vigorous-intensity physical activity | 0.85<br>(0.59-1.22)<br>P trend=0.31 | Moderate physical activity, age at diagnosis, tumour stage, residency at diagnosis, time from diagnosis to exposure assessment, BMI, menopausal status, hormonal therapy, energy intake, education, family history, treatment |
| Irwin 2008, HEAL, USA                        | Prospective cohort study of 688 pre- and post-menopausal breast cancer survivors diagnosed with local or regional breast cancer<br><br>Pre and postmenopausal<br><br>Mean age 55 years (SD 11 years) | Diagnosed in 1995-1998<br><br>Median (range) years follow up: 6 (5-8) | Primary local or regional breast cancer | 2-year post diagnosis assessed through the interview-administered Modifiable Activity Questionnaire (validated using doubly labelled water) | All-cause mortality (n=53)                                                                        | ≥9 vs. 0 MET-h/week                                                 | 0.33 (0.15-0.73)<br>P trend=0.046   | Age, race, disease stage, treatment, tamoxifen use, BMI, fruit and vegetable consumption                                                                                                                                      |
|                                              |                                                                                                                                                                                                      |                                                                       |                                         |                                                                                                                                             | BMI<25 kg/m <sup>2</sup> (n=28)                                                                   | >0 vs. 0 MET-h/week                                                 | 0.47 (0.19-1.14)                    |                                                                                                                                                                                                                               |
|                                              |                                                                                                                                                                                                      |                                                                       |                                         |                                                                                                                                             | BMI≥25 kg/m <sup>2</sup> (n=25)                                                                   |                                                                     | 0.31 (0.13-0.74)                    |                                                                                                                                                                                                                               |
|                                              |                                                                                                                                                                                                      |                                                                       |                                         |                                                                                                                                             | ER-negative (n=11)                                                                                | ≥0 vs. 0 MET-h/week                                                 | 1.26 (0.15-11.00)                   |                                                                                                                                                                                                                               |
|                                              |                                                                                                                                                                                                      |                                                                       |                                         |                                                                                                                                             | ER-positive (n=34)                                                                                |                                                                     | 0.20 (0.09-0.46)                    |                                                                                                                                                                                                                               |
|                                              |                                                                                                                                                                                                      |                                                                       |                                         |                                                                                                                                             | Increase physical activity (n=7)                                                                  | >3 vs. 0 MET-h/week                                                 | 0.55 (0.22-1.38)                    |                                                                                                                                                                                                                               |

**Supplementary Table 5B Descriptive table of studies included in analyses of recreational physical activity after diagnosis and breast cancer prognosis**

| Author, year, study name, country, WCRF Code | Study description                                                                                                | Time of diagnosis and follow-up                                     | Disease characteristics treatment                                                         | Exposure assessment                                                                                                                                                                                                                                                          | Outcome (Events)                        | Contrast              | HR (95% CI)                       | Covariates                                                                                                                                                                                                                                                       |
|----------------------------------------------|------------------------------------------------------------------------------------------------------------------|---------------------------------------------------------------------|-------------------------------------------------------------------------------------------|------------------------------------------------------------------------------------------------------------------------------------------------------------------------------------------------------------------------------------------------------------------------------|-----------------------------------------|-----------------------|-----------------------------------|------------------------------------------------------------------------------------------------------------------------------------------------------------------------------------------------------------------------------------------------------------------|
|                                              |                                                                                                                  |                                                                     |                                                                                           |                                                                                                                                                                                                                                                                              | Maintain physical activity (11)         | +/- 3 MET-h/week      | 1.55 (0.64-3.80)                  |                                                                                                                                                                                                                                                                  |
|                                              |                                                                                                                  |                                                                     |                                                                                           |                                                                                                                                                                                                                                                                              | Decrease physical activity (n=19)       | < -3 vs. 0 MET-h/week | 3.95 (1.45-10.50)                 |                                                                                                                                                                                                                                                                  |
|                                              |                                                                                                                  |                                                                     |                                                                                           |                                                                                                                                                                                                                                                                              | Breast cancer-specific mortality (n=30) | ≥9 vs. 0 MET-h/week   | 0.65 (0.23-1.87)<br>P trend=0.046 |                                                                                                                                                                                                                                                                  |
|                                              |                                                                                                                  |                                                                     |                                                                                           |                                                                                                                                                                                                                                                                              | Increase physical activity (n=6)        | >3 vs. 0 MET-h/week   | 0.82 (0.29-2.34)                  |                                                                                                                                                                                                                                                                  |
|                                              |                                                                                                                  |                                                                     |                                                                                           |                                                                                                                                                                                                                                                                              | Maintain physical activity (7)          | +/- 3 MET-h/week      | 2.47 (0.78-7.78)                  |                                                                                                                                                                                                                                                                  |
|                                              |                                                                                                                  |                                                                     |                                                                                           |                                                                                                                                                                                                                                                                              | Decrease physical activity (n=7)        | < -3 vs. 0 MET-h/week | 3.69 (0.88-15.92)                 |                                                                                                                                                                                                                                                                  |
| Holmes 2005, NHS, USA                        | Prospective cohort of 2987 pre- and post-menopausal breast cancer survivors<br><br>Age range: 30 to 55 years old | Diagnosed 1982-1984<br><br>Median follow up in months: 96 (8 years) | Invasive breast cancer stage I, II and III<br><br>991 patients had undergone chemotherapy | Questionnaire more than 2 years after breast cancer diagnosis correlation for total MET-hours per week of activity was excellent (r=0.62; 95% confidence interval [CI], 0.44-0.75), suggesting that the questionnaire is a valid tool for categorical ranking of respondents | All-cause mortality (n=463)             | ≥24 vs. <3 MET-h/week | 0.65 (0.48-0.88)<br>P trend=0.003 | Age, time from diagnosis to exposure assessment, smoking, BMI, menopausal status, hormonal therapy, age at first birth, parity, oral contraceptive, energy-adjusted protein intake, stage (I, II, III), radiation treatment (yes/no) tamoxifen use, chemotherapy |
|                                              |                                                                                                                  |                                                                     |                                                                                           | Breast cancer-specific mortality (n=280)                                                                                                                                                                                                                                     | 0.6 (0.4-0.89)<br>P trend=0.004         |                       |                                   |                                                                                                                                                                                                                                                                  |
|                                              |                                                                                                                  |                                                                     |                                                                                           | BMI<25 kg/m <sup>2</sup> (n=159)                                                                                                                                                                                                                                             | 0.61 (0.37-0.99)<br>P trend=0.10        |                       |                                   |                                                                                                                                                                                                                                                                  |
|                                              |                                                                                                                  |                                                                     |                                                                                           | BMI≥25 kg/m <sup>2</sup> (n=121)                                                                                                                                                                                                                                             | 0.52 (0.26-1.06)<br>P trend=0.01        |                       |                                   |                                                                                                                                                                                                                                                                  |

**Supplementary Table 5B Descriptive table of studies included in analyses of recreational physical activity after diagnosis and breast cancer prognosis**

| Author, year, study name, country, WCRF Code | Study description | Time of diagnosis and follow-up | Disease characteristics treatment | Exposure assessment | Outcome (Events)                                                                                | Contrast              | HR (95% CI)                             | Covariates |
|----------------------------------------------|-------------------|---------------------------------|-----------------------------------|---------------------|-------------------------------------------------------------------------------------------------|-----------------------|-----------------------------------------|------------|
|                                              |                   |                                 |                                   |                     | Postmenopausal only (n=206)                                                                     | ≥9 vs. <9 MET-h/week  | 0.73<br>(0.54-0.98)                     |            |
|                                              |                   |                                 |                                   |                     | Premenopausal only (n=58)                                                                       |                       | 0.58<br>(0.32-1.04)                     |            |
|                                              |                   |                                 |                                   |                     | Breast cancer-specific mortality ER-PR-                                                         | ≥9 vs. <9 MET-h/week  | 0.91<br>(0.43-1.96)                     |            |
|                                              |                   |                                 |                                   |                     | Breast cancer-specific mortality ER+PR+                                                         |                       | 0.5<br>(0.34-0.74)                      |            |
|                                              |                   |                                 |                                   |                     | Recurrence (n=370)<br>Definition includes: Second cancer diagnosis, or death from breast cancer | ≥24 vs. <3 MET-h/week | 0.74<br>(0.53-1.04)<br><br>P trend=0.05 |            |

LACE Life After Cancer Epidemiology study, USA United States of America, MET Metabolic equivalent of task, BMI Body mass index, ER+ Estrogen receptor positive, ER- Estrogen receptor negative, PR+ Progesterone receptor positive, PR- Progesterone receptor negative, SD Standard deviation, PA physical activity, IQR Inter quartile range, SEER Surveillance, Epidemiology, and End Results, DCIS Ductal carcinoma in situ, CPS-II Nutrition Cohort Cancer Prevention Study-II Nutrition Cohort, WISC Wisconsin In Situ Cohort study, DCH Diet, Cancer, and Health cohort, ABCPP After Breast Cancer Pooling Project, SBCSS Shanghai Breast cancer Survival Study, LIBCSP Long Island Breast Cancer Study, TEAM-L side stud Tamoxifen Exemestane Adjuvant Multicenter Lifestyle side study, WHI Women's Health Initiative, WHEL The Women's Healthy Eating and Living Study, CWLS Collaborative Women's Longevity Study, HEAL The Health Eating Activity and Lifestyle Study, NHS Nurses' Health Study, HER2 Human epidermal growth factor receptor two

| Supplementary Table 6 Descriptive table of follow-up observational analyses of patients enrolled in clinical trials of exercise after breast cancer diagnosis |                                                                                                                                       |                                                           |                                                                                                                                                          |                                                                                                |                                              |                                                                |                            |                                                                                                                                                                                  |                                                                          |                                 |                              |
|---------------------------------------------------------------------------------------------------------------------------------------------------------------|---------------------------------------------------------------------------------------------------------------------------------------|-----------------------------------------------------------|----------------------------------------------------------------------------------------------------------------------------------------------------------|------------------------------------------------------------------------------------------------|----------------------------------------------|----------------------------------------------------------------|----------------------------|----------------------------------------------------------------------------------------------------------------------------------------------------------------------------------|--------------------------------------------------------------------------|---------------------------------|------------------------------|
| Author, Year, Study name, Country                                                                                                                             | Characteristics of study population                                                                                                   | Randomisation, blinding                                   | Intervention and timeframe                                                                                                                               | Follow-up time, Compliance                                                                     | Outcome                                      | Intervention vs control group                                  | HR (95% CI)                | Adjustments                                                                                                                                                                      |                                                                          |                                 |                              |
| Hayes 2018, The Exercise for Health trials (EfH) – Urban study – Rural study, Australia                                                                       | Urban- (n=194) and rural (n=143) regional-residing Stage 0-III breast cancer women (n=337)<br>Usual care:<br>Mean age 53.9±8.3 years. | Computer-generated, unblocked. sequence of random numbers | Face-face/phone-delivered aerobic-and resistance-based, moderate-intensity exercise intervention, commenced 6 weeks post-surgery, 8-month, >180 min/week | Median 8.3 years<br>No loss to follow-up ≥75% compliance: exercise (n=152); usual care (n=130) | <b>Primary endpoint</b>                      | Moderate/high-intensity exercise (n=207) vs Usual care (n=130) | 0.45 (0.20-0.97)<br>P=0.04 | Randomization factors: age, body mass index, comorbidities, stage, lymph node status, ER/PR status, HER2 status, surgery, chemotherapy, radiotherapy, hormone therapy, herceptin |                                                                          |                                 |                              |
|                                                                                                                                                               |                                                                                                                                       |                                                           |                                                                                                                                                          |                                                                                                | Overall survival                             |                                                                |                            |                                                                                                                                                                                  | Study, age, body mass index, presence of comorbidities and disease stage |                                 |                              |
|                                                                                                                                                               |                                                                                                                                       |                                                           |                                                                                                                                                          |                                                                                                | (Exercise: 11 deaths; usual care: 15 deaths) |                                                                |                            |                                                                                                                                                                                  |                                                                          |                                 |                              |
|                                                                                                                                                               |                                                                                                                                       |                                                           |                                                                                                                                                          |                                                                                                | Overall survival                             |                                                                |                            |                                                                                                                                                                                  |                                                                          | Randomization factors as above* |                              |
|                                                                                                                                                               |                                                                                                                                       |                                                           |                                                                                                                                                          |                                                                                                | Age <55 years                                |                                                                |                            |                                                                                                                                                                                  |                                                                          |                                 | 0.44 (0.19-0.98),<br>P=0.046 |
|                                                                                                                                                               |                                                                                                                                       |                                                           |                                                                                                                                                          |                                                                                                | Age ≥55 years                                |                                                                |                            |                                                                                                                                                                                  |                                                                          |                                 | 0.32 (0.11-0.87)             |
|                                                                                                                                                               |                                                                                                                                       |                                                           |                                                                                                                                                          |                                                                                                | BMI <25                                      |                                                                |                            |                                                                                                                                                                                  |                                                                          |                                 | 0.74 (0.21-2.54)             |
|                                                                                                                                                               |                                                                                                                                       |                                                           |                                                                                                                                                          |                                                                                                | BMI 25 to 29.9                               |                                                                |                            |                                                                                                                                                                                  |                                                                          |                                 | 0.43 (0.10-1.93)             |
|                                                                                                                                                               |                                                                                                                                       |                                                           |                                                                                                                                                          |                                                                                                | BMI ≥30                                      |                                                                |                            |                                                                                                                                                                                  |                                                                          |                                 | 0.32 (0.08-1.27)             |
|                                                                                                                                                               |                                                                                                                                       |                                                           |                                                                                                                                                          |                                                                                                | Disease stage I                              |                                                                |                            |                                                                                                                                                                                  |                                                                          |                                 | 0.62 (0.18-2.13)             |
|                                                                                                                                                               |                                                                                                                                       |                                                           |                                                                                                                                                          |                                                                                                | Disease stage II-III                         |                                                                |                            |                                                                                                                                                                                  |                                                                          |                                 | 0.36 (0.03-3.93)             |
|                                                                                                                                                               |                                                                                                                                       |                                                           |                                                                                                                                                          |                                                                                                | No comorbidities                             |                                                                |                            |                                                                                                                                                                                  |                                                                          |                                 | 0.40 (0.17-0.95)             |
|                                                                                                                                                               |                                                                                                                                       |                                                           |                                                                                                                                                          |                                                                                                | Yes comorbidities                            |                                                                |                            |                                                                                                                                                                                  |                                                                          |                                 | 0.78 (0.13-4.71)             |
|                                                                                                                                                               |                                                                                                                                       |                                                           |                                                                                                                                                          |                                                                                                | Compliance with intervention ≥75%            |                                                                |                            |                                                                                                                                                                                  |                                                                          |                                 | 0.39 (0.16-0.40)             |
|                                                                                                                                                               |                                                                                                                                       |                                                           |                                                                                                                                                          |                                                                                                | Compliance with intervention <75%            |                                                                |                            |                                                                                                                                                                                  |                                                                          |                                 | 0.38 (0.16-0.98)             |
|                                                                                                                                                               |                                                                                                                                       |                                                           |                                                                                                                                                          |                                                                                                | Physical activity ≥150 minutes               |                                                                |                            |                                                                                                                                                                                  |                                                                          |                                 | 0.50 (0.15-1.73)             |
|                                                                                                                                                               |                                                                                                                                       |                                                           |                                                                                                                                                          |                                                                                                | Physical activity <150 minutes               |                                                                |                            |                                                                                                                                                                                  |                                                                          |                                 | 0.33 (0.11-0.98)             |
| Physical activity 0 minutes                                                                                                                                   | 0.41 (0.12-1.40)                                                                                                                      |                                                           |                                                                                                                                                          |                                                                                                |                                              |                                                                |                            |                                                                                                                                                                                  |                                                                          |                                 |                              |
| Physical activity ≥150 minutes with vigorous                                                                                                                  | 0.63 (0.14-2.77)                                                                                                                      |                                                           |                                                                                                                                                          |                                                                                                |                                              |                                                                |                            |                                                                                                                                                                                  |                                                                          |                                 |                              |
| Physical activity ≥150 minutes without vigorous                                                                                                               | 0.20 (0.03-1.49)                                                                                                                      |                                                           |                                                                                                                                                          |                                                                                                |                                              |                                                                |                            |                                                                                                                                                                                  |                                                                          |                                 |                              |
|                                                                                                                                                               | 0.42 (0.12-1.44)                                                                                                                      |                                                           |                                                                                                                                                          |                                                                                                |                                              |                                                                |                            |                                                                                                                                                                                  |                                                                          |                                 |                              |



|  |  |  |  |                                                                   |                            |                                                                          |
|--|--|--|--|-------------------------------------------------------------------|----------------------------|--------------------------------------------------------------------------|
|  |  |  |  | <150 minutes                                                      | 0.41 (0.12-1.40)           |                                                                          |
|  |  |  |  | 0 minutes                                                         | 0.63 (0.15-2.77)           |                                                                          |
|  |  |  |  | Face to face intervention                                         | 0.24 (0.05-1.17)           |                                                                          |
|  |  |  |  | Telephone intervention                                            | 0.37 (0.10-1.44)           |                                                                          |
|  |  |  |  | <b>Secondary endpoint</b>                                         |                            |                                                                          |
|  |  |  |  | Disease free survival (Exercise: 25 events; usual care 23 events) | 0.66 (0.38-1.17)<br>P=0.16 | Randomization factors as above*                                          |
|  |  |  |  | Disease free survival                                             | 0.65 (0.36-1.17), P=0.15   | Study, age, body mass index, presence of comorbidities and disease stage |
|  |  |  |  | Age <55 years                                                     | 0.56 (0.27-1.16)           | Randomization factors as above*                                          |
|  |  |  |  | Age >=55 years                                                    | 0.84 (0.34-2.07)           |                                                                          |
|  |  |  |  | BMI <25                                                           | 0.63 (0.24-1.64)           |                                                                          |
|  |  |  |  | BMI 25 to 29.9                                                    | 0.75 (0.29-1.95)           |                                                                          |
|  |  |  |  | BMI >=30                                                          | 0.62 (0.22-1.77)           |                                                                          |
|  |  |  |  | Disease stage I                                                   | 0.89 (0.27-2.91)           |                                                                          |
|  |  |  |  | Disease stage II-III                                              | 0.53 (0.27-1.04)           |                                                                          |
|  |  |  |  | No comorbidities                                                  | 0.94 (0.17-5.13)           |                                                                          |
|  |  |  |  | Yes comorbidities                                                 | 0.64 (0.35-1.16)           |                                                                          |
|  |  |  |  | Compliance with intervention >=75%                                | 0.61 (0.32-1.53)           |                                                                          |
|  |  |  |  | Compliance with intervention <75%                                 | 0.76 (0.33-1.77)           |                                                                          |
|  |  |  |  | Physical activity >=150 minutes                                   | 0.47 (0.22-1.02)           |                                                                          |
|  |  |  |  | Physical activity <150 minutes                                    | 0.82 (0.38-1.77)           |                                                                          |
|  |  |  |  | Physical activity 0 minutes                                       | 0.81 (0.28-2.36)           |                                                                          |
|  |  |  |  | Physical activity >=150 minutes with vigorous                     | 0.25 (0.06-1.06)           |                                                                          |

|                                                                                                                                |                                                                                                                                                               |                                                                                                                                                                                                   |                                                                                                                                                                                                                                                                                                                                                                                |                                                                                                            |                                                                                                                  |                                                                                             |                      |                                                                                                                                                                                                                                                                                                                                                                       |
|--------------------------------------------------------------------------------------------------------------------------------|---------------------------------------------------------------------------------------------------------------------------------------------------------------|---------------------------------------------------------------------------------------------------------------------------------------------------------------------------------------------------|--------------------------------------------------------------------------------------------------------------------------------------------------------------------------------------------------------------------------------------------------------------------------------------------------------------------------------------------------------------------------------|------------------------------------------------------------------------------------------------------------|------------------------------------------------------------------------------------------------------------------|---------------------------------------------------------------------------------------------|----------------------|-----------------------------------------------------------------------------------------------------------------------------------------------------------------------------------------------------------------------------------------------------------------------------------------------------------------------------------------------------------------------|
|                                                                                                                                |                                                                                                                                                               |                                                                                                                                                                                                   |                                                                                                                                                                                                                                                                                                                                                                                |                                                                                                            | Physical activity<br>>=150 minutes<br>without vigorous<br><150 minutes                                           | 0.64 (0.27-<br>1.48)                                                                        |                      |                                                                                                                                                                                                                                                                                                                                                                       |
|                                                                                                                                |                                                                                                                                                               |                                                                                                                                                                                                   |                                                                                                                                                                                                                                                                                                                                                                                |                                                                                                            | 0 minutes                                                                                                        | 0.82 (0.38-<br>1.77)                                                                        |                      |                                                                                                                                                                                                                                                                                                                                                                       |
|                                                                                                                                |                                                                                                                                                               |                                                                                                                                                                                                   |                                                                                                                                                                                                                                                                                                                                                                                |                                                                                                            | Face to face<br>intervention                                                                                     | 0.81 (0.28-<br>2.36)                                                                        |                      |                                                                                                                                                                                                                                                                                                                                                                       |
|                                                                                                                                |                                                                                                                                                               |                                                                                                                                                                                                   |                                                                                                                                                                                                                                                                                                                                                                                |                                                                                                            | Telephone<br>intervention                                                                                        | 0.28 (0.09-<br>0.87)                                                                        |                      |                                                                                                                                                                                                                                                                                                                                                                       |
|                                                                                                                                |                                                                                                                                                               |                                                                                                                                                                                                   |                                                                                                                                                                                                                                                                                                                                                                                |                                                                                                            |                                                                                                                  | 0.51 (0.20-<br>1.29)                                                                        |                      |                                                                                                                                                                                                                                                                                                                                                                       |
| <b>Courneya<br/>2014</b><br>The<br>Supervised<br>Trial of<br>Aerobic<br>versus<br>Resistance<br>Training<br>(START),<br>Canada | Women ≥ 18 years<br>of age with stage<br>I-IIIa breast<br>cancer who were<br>beginning first-line<br>adjuvant<br>chemotherapy<br>(n=242)<br>33% response rate | Computer-<br>generated<br>randomization<br>(randomly<br>assigned to<br>aerobic exercise<br>training (AET),<br>resistance<br>exercise training<br>(RET), or usual<br>care (UC) in a<br>1:1:1 ratio | Supervised<br>aerobic<br>exercise<br>training/<br>resistance<br>exercise<br>training,<br>commenced 1-2<br>weeks after<br>starting<br>chemotherapy<br>and ended 3<br>weeks after<br>completing<br>chemotherapy<br>Usual care: no<br>exercise during<br>chemotherapy<br>but offered a 1-<br>month exercise<br>crossover post-<br>intervention<br>(30.5% of the<br>control group) | Median of 89<br>months<br>Compliance:<br>Resistant<br>(68,2%) and<br>aerobic (72%)<br>attended<br>sessions | <b>Secondary<br/>endpoint</b><br>Overall survival<br>(Exercise: 13 events;<br>usual care 11<br>events)           | Resistant (n=82)<br>and aerobic<br>(n=78) exercises<br>combined vs.<br>Usual care<br>(n=82) | 0.60 (0.27-<br>1.33) | Randomisation factors: age at<br>random assignment, body mass<br>index, disease stage, primary<br>tumour size, nodal status, tumour<br>grade, ER status, progesterone<br>receptor status, Intrinsic subtype,<br>extent of surgery, chemotherapy<br>regimen, average RDI, adjuvant<br>radiation therapy, adjuvant<br>endocrine therapy, adjuvant<br>herceptin (yes/no) |
|                                                                                                                                |                                                                                                                                                               |                                                                                                                                                                                                   |                                                                                                                                                                                                                                                                                                                                                                                |                                                                                                            | Overall survival                                                                                                 |                                                                                             | 0.72 (0.31-<br>1.67) | Centre, chemotherapy regimen,<br>ER status, tumour size, nodal<br>status,<br>extent of surgery, age                                                                                                                                                                                                                                                                   |
|                                                                                                                                |                                                                                                                                                               |                                                                                                                                                                                                   |                                                                                                                                                                                                                                                                                                                                                                                |                                                                                                            | <b>Primary endpoint</b><br><b>Disease-free<br/>survival</b><br>(Exercise: 25 events;<br>usual care 18<br>events) |                                                                                             | 0.68 (0.37-<br>1.24) | Randomisation factors as above                                                                                                                                                                                                                                                                                                                                        |
|                                                                                                                                |                                                                                                                                                               |                                                                                                                                                                                                   |                                                                                                                                                                                                                                                                                                                                                                                |                                                                                                            | Disease-free survival                                                                                            |                                                                                             | 0.76 (0.40-<br>1.43) | Centre, chemotherapy regimen,<br>ER status, tumour size, nodal<br>status,<br>extent of surgery, age                                                                                                                                                                                                                                                                   |
|                                                                                                                                |                                                                                                                                                               |                                                                                                                                                                                                   |                                                                                                                                                                                                                                                                                                                                                                                |                                                                                                            | Disease-free<br>Age <50                                                                                          |                                                                                             | 0.77 (0.32-<br>1.84) |                                                                                                                                                                                                                                                                                                                                                                       |
|                                                                                                                                |                                                                                                                                                               |                                                                                                                                                                                                   |                                                                                                                                                                                                                                                                                                                                                                                |                                                                                                            | Age ≥50                                                                                                          |                                                                                             | 0.55 (0.23-<br>1.31) |                                                                                                                                                                                                                                                                                                                                                                       |
|                                                                                                                                |                                                                                                                                                               |                                                                                                                                                                                                   |                                                                                                                                                                                                                                                                                                                                                                                |                                                                                                            | Normal weight                                                                                                    |                                                                                             | 0.85 (0.30-<br>2.45) |                                                                                                                                                                                                                                                                                                                                                                       |
|                                                                                                                                |                                                                                                                                                               |                                                                                                                                                                                                   |                                                                                                                                                                                                                                                                                                                                                                                |                                                                                                            | Overweight/Obese                                                                                                 |                                                                                             | 0.59 (0.27-<br>1.27) |                                                                                                                                                                                                                                                                                                                                                                       |
|                                                                                                                                |                                                                                                                                                               |                                                                                                                                                                                                   |                                                                                                                                                                                                                                                                                                                                                                                |                                                                                                            | Disease stage I                                                                                                  |                                                                                             | 1.04 (0.26-<br>4.17) |                                                                                                                                                                                                                                                                                                                                                                       |
|                                                                                                                                |                                                                                                                                                               |                                                                                                                                                                                                   |                                                                                                                                                                                                                                                                                                                                                                                |                                                                                                            | Disease stage II/III                                                                                             |                                                                                             | 0.61 (0.31-<br>1.20) |                                                                                                                                                                                                                                                                                                                                                                       |
| Oestrogen receptor<br>negative                                                                                                 |                                                                                                                                                               | 1.10 (0.43-<br>2.86)                                                                                                                                                                              |                                                                                                                                                                                                                                                                                                                                                                                |                                                                                                            |                                                                                                                  |                                                                                             |                      |                                                                                                                                                                                                                                                                                                                                                                       |
| Oestrogen receptor<br>positive                                                                                                 |                                                                                                                                                               | 0.58 (0.26-<br>1.29)                                                                                                                                                                              |                                                                                                                                                                                                                                                                                                                                                                                |                                                                                                            |                                                                                                                  |                                                                                             |                      |                                                                                                                                                                                                                                                                                                                                                                       |

|  |  |  |  |                                                                                                                 |                  |                                                                                            |
|--|--|--|--|-----------------------------------------------------------------------------------------------------------------|------------------|--------------------------------------------------------------------------------------------|
|  |  |  |  | Luminal                                                                                                         | 0.86 (0.33-2.22) |                                                                                            |
|  |  |  |  | HER2                                                                                                            | 0.21 (0.04-1.02) |                                                                                            |
|  |  |  |  | Triple negative                                                                                                 | 1.25 (0.40-3.95) |                                                                                            |
|  |  |  |  | Chemotherapy protocol: non-taxane                                                                               | 0.95 (0.41-2.22) |                                                                                            |
|  |  |  |  | Chemotherapy protocol: Taxane                                                                                   | 0.46 (0.19-1.15) |                                                                                            |
|  |  |  |  | Disease-free survival<br>Average relative dose intensity <85%                                                   | 1.22 (0.35-4.17) |                                                                                            |
|  |  |  |  | Average relative dose intensity >85%                                                                            | 0.50 (0.25-1.01) |                                                                                            |
|  |  |  |  | <b>Secondary endpoint</b><br><br>Distant disease-free survival<br>(Exercise: 20 events; usual care 16 events)   | 0.62 (0.32-1.19) | Randomisation factors as above                                                             |
|  |  |  |  | Distant disease-free survival                                                                                   | 0.72 (0.36-1.42) | Centre, chemotherapy regimen, ER status, tumour size, nodal status, extent of surgery, age |
|  |  |  |  | <b>Secondary endpoint</b><br><br><b>Recurrence free survival</b><br>(Exercise: 20 events; usual care 17 events) | 0.58 (0.30-1.11) | Randomisation factors as above                                                             |
|  |  |  |  | Recurrence free survival                                                                                        | 0.61 (0.31-1.21) | Centre, chemotherapy regimen, ER status, tumour size, nodal status, extent of surgery, age |
|  |  |  |  | Age <50                                                                                                         | 0.61 (0.25-1.52) |                                                                                            |
|  |  |  |  | Age >=50                                                                                                        | 0.50 (0.20-1.29) |                                                                                            |
|  |  |  |  | Normal weight                                                                                                   | 0.88 (0.27-2.86) |                                                                                            |
|  |  |  |  | Recurrence free survival<br>Overweight/Obese                                                                    | 0.46 (0.20-1.05) |                                                                                            |
|  |  |  |  | Disease stage I                                                                                                 | 0.91 (0.22-3.79) |                                                                                            |
|  |  |  |  | Disease stage II/III                                                                                            | 0.52 (0.23-1.16) |                                                                                            |
|  |  |  |  | Oestrogen receptor negative                                                                                     | 0.85 (0.28-2.52) |                                                                                            |

|                                                        |  |  |  |  |                                      |                  |  |
|--------------------------------------------------------|--|--|--|--|--------------------------------------|------------------|--|
|                                                        |  |  |  |  | Oestrogen receptor positive          | 0.52 (0.23-1.16) |  |
|                                                        |  |  |  |  | Luminal                              | 0.70 (0.26-1.85) |  |
|                                                        |  |  |  |  | Recurrence free survival HER2        | 0.21 (0.04-1.02) |  |
|                                                        |  |  |  |  | Triple negative                      | 1.17 (0.31-4.37) |  |
|                                                        |  |  |  |  | Chemotherapy protocol: non-taxane    | 0.67 (0.27-1.65) |  |
|                                                        |  |  |  |  | Chemotherapy protocol: Taxane        | 0.52 (0.21-1.32) |  |
|                                                        |  |  |  |  | Average relative dose intensity <85% | 1.47 (0.68-5.90) |  |
|                                                        |  |  |  |  | Average relative dose intensity >85% | 0.38 (0.18-0.81) |  |
| Note: Intention-to-treat analysis in both publications |  |  |  |  |                                      |                  |  |

**Supplementary Table 7 Hazard ratios (95% CI) for non-linear analysis of recreational physical activity after diagnosis and breast cancer prognosis outcomes**

| <b>All-cause mortality</b>                                                                                                                                |                             | <b>Breast cancer-specific mortality</b> |
|-----------------------------------------------------------------------------------------------------------------------------------------------------------|-----------------------------|-----------------------------------------|
| <b>Physical activity<br/>(MET-h/week)</b>                                                                                                                 | <b>HR (95% CI)</b>          | <b>HR (95% CI)</b>                      |
| 0                                                                                                                                                         | 1.00 (ref)                  | 1.00 (ref)                              |
| 5                                                                                                                                                         | 0.79 (0.72-0.87)            | 0.81 (0.71-0.91)                        |
| 10                                                                                                                                                        | 0.65 (0.55-0.77)            | 0.69 (0.57-0.85)                        |
| 15                                                                                                                                                        | 0.57 (0.46-0.70)            | 0.64 (0.51-0.80)                        |
| 20                                                                                                                                                        | 0.53 (0.43-0.66)            | 0.62 (0.49-0.78)                        |
| 25                                                                                                                                                        | 0.52 (0.42-0.64)            | 0.62 (0.50-0.76)                        |
| 30                                                                                                                                                        | 0.53 (0.44-0.63)            | 0.63 (0.52-0.76)                        |
| 35                                                                                                                                                        | 0.55 (0.46-0.65)            | 0.64 (0.52-0.77)                        |
| 40                                                                                                                                                        | 0.57 (0.48-0.67)            | 0.64 (0.52-0.79)                        |
| 45                                                                                                                                                        | 0.60 (0.50-0.72)            | 0.65 (0.52-0.82)                        |
| 50                                                                                                                                                        | 0.62 (0.50-0.78)            | 0.66 (0.51-0.86)                        |
|                                                                                                                                                           | <b>p-Wald test&lt;0.001</b> | <b>p-Wald test&lt;0.001</b>             |
| Ten studies included in non-linear meta-analysis for all-cause mortality and ten studies included in non-linear meta-analysis of breast cancer mortality. |                             |                                         |

**Supplementary Table 8 Summary of the judgement of the WCRF Expert Panel**

| DIET, NUTRITION, PHYSICAL ACTIVITY AND SURVIVAL IN WOMEN WITH BREAST CANCER |                                |          |                                  |                                       |                                                             |                |                     |                    |                                                                                                                                                                                                                                                                                                                                                                                                                                                                                                          |
|-----------------------------------------------------------------------------|--------------------------------|----------|----------------------------------|---------------------------------------|-------------------------------------------------------------|----------------|---------------------|--------------------|----------------------------------------------------------------------------------------------------------------------------------------------------------------------------------------------------------------------------------------------------------------------------------------------------------------------------------------------------------------------------------------------------------------------------------------------------------------------------------------------------------|
| 2020 Decision from evidence judgement                                       | Decreases risk                 |          |                                  |                                       |                                                             |                |                     |                    |                                                                                                                                                                                                                                                                                                                                                                                                                                                                                                          |
|                                                                             | Limited-suggestive evidence    | Exposure | Outcomes                         | Summary of findings                   |                                                             |                | Conclusions         |                    |                                                                                                                                                                                                                                                                                                                                                                                                                                                                                                          |
|                                                                             | Recreational physical activity |          | N studies, (N publications)      | Summary HR (95% CI) per 10 MET-h/week | Heterogeneity                                               |                | Small study effects |                    |                                                                                                                                                                                                                                                                                                                                                                                                                                                                                                          |
|                                                                             |                                |          |                                  |                                       |                                                             | I <sup>2</sup> |                     | Q value, Q p-value | Egger's p-value                                                                                                                                                                                                                                                                                                                                                                                                                                                                                          |
|                                                                             |                                |          | All-cause mortality              | 12 (9)                                | 0.85 (0.78-0.92)                                            | 87%            | 62, <0.01           | 0.01               | Evidence was limited but generally consistent in direction and magnitude.<br><br>There is a dose-response relationship for all-cause mortality and breast-specific mortality, but the evidence may be limited in methodological quality.<br><br>The strong risk reductions observed for the highest versus lowest physical activity levels are not plausible in context. Reverse causation and residual confounding cannot be ruled out, although the studies consistently reported a beneficial effect. |
|                                                                             |                                |          | Breast cancer-specific mortality | 11 (8)                                | 0.86 (0.77-0.96)                                            | 65%            | 23, 0.01            | 0.05               |                                                                                                                                                                                                                                                                                                                                                                                                                                                                                                          |
|                                                                             |                                |          | Recurrence                       | 6 (3)                                 | 0.97 (0.91-1.05)                                            | 68%            | 6, 0.05             | -                  |                                                                                                                                                                                                                                                                                                                                                                                                                                                                                                          |
|                                                                             |                                |          |                                  |                                       | <b>Summary HR (95% CI) Highest vs. Lowest meta-analyses</b> |                |                     |                    |                                                                                                                                                                                                                                                                                                                                                                                                                                                                                                          |
|                                                                             |                                |          | All-cause mortality              | 15 (12)                               | 0.56 (0.49-0.64)                                            | 30%            | 17, 0.12            | 0.34               |                                                                                                                                                                                                                                                                                                                                                                                                                                                                                                          |
|                                                                             |                                |          | Breast cancer-specific mortality | 12 (9)                                | 0.58 (0.44-0.77)                                            | 54%            | 16, 0.08            | 0.11               |                                                                                                                                                                                                                                                                                                                                                                                                                                                                                                          |
|                                                                             |                                |          | Recurrence                       | 6 (3)                                 | 0.80 (0.56-1.14)                                            | 60%            | 5, 0.08             | -                  |                                                                                                                                                                                                                                                                                                                                                                                                                                                                                                          |

**Limited evidence:** These criteria are for evidence that is too limited to permit a probable or convincing judgement, but where there is evidence suggestive of a direction of effect. The evidence may have methodological flaws, or be limited in amount, but shows a generally consistent direction of effect. This level of evidence would not generally be used to justify making specific recommendations.

## Supplementary Figures

**Supplementary Figure 1 Summary hazard ratio (95% CI) of all-cause mortality, breast cancer-specific mortality and recurrence for the highest compared with the lowest level of total physical activity after diagnosis.**

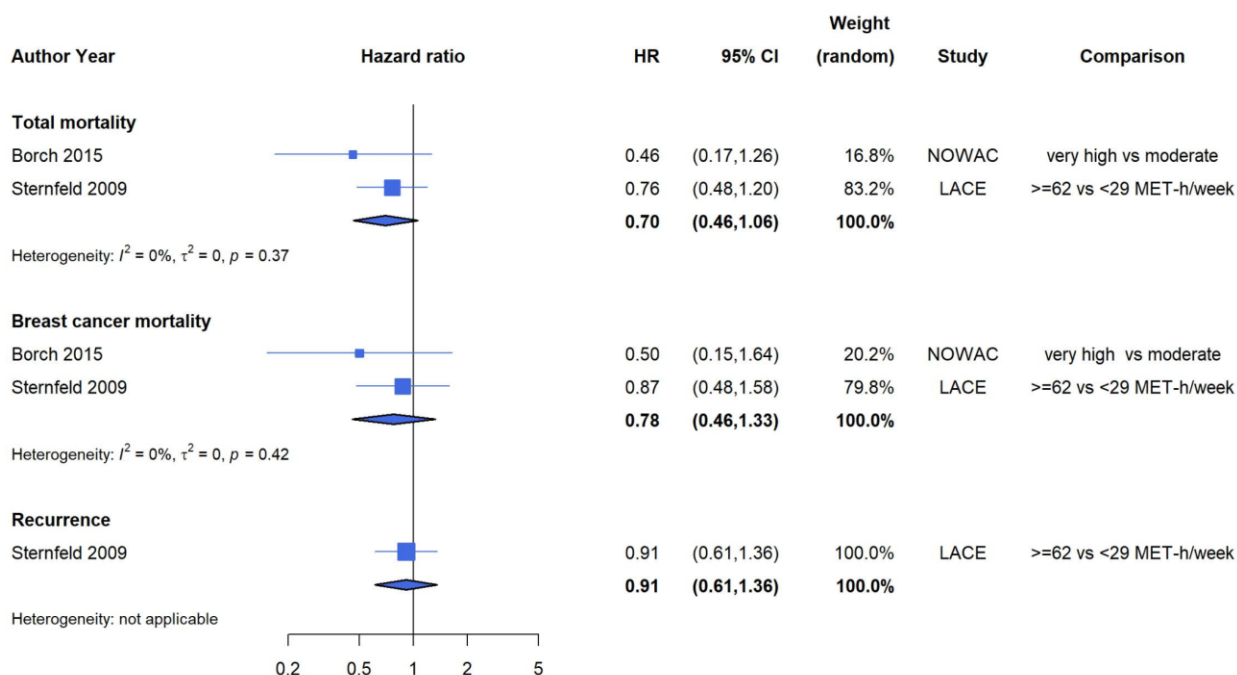

**Supplementary Figure 2 Effects of exercise during and after adjuvant treatment on breast cancer outcomes – follow-up observational analyses of patients enrolled in clinical trials (no pooling).**

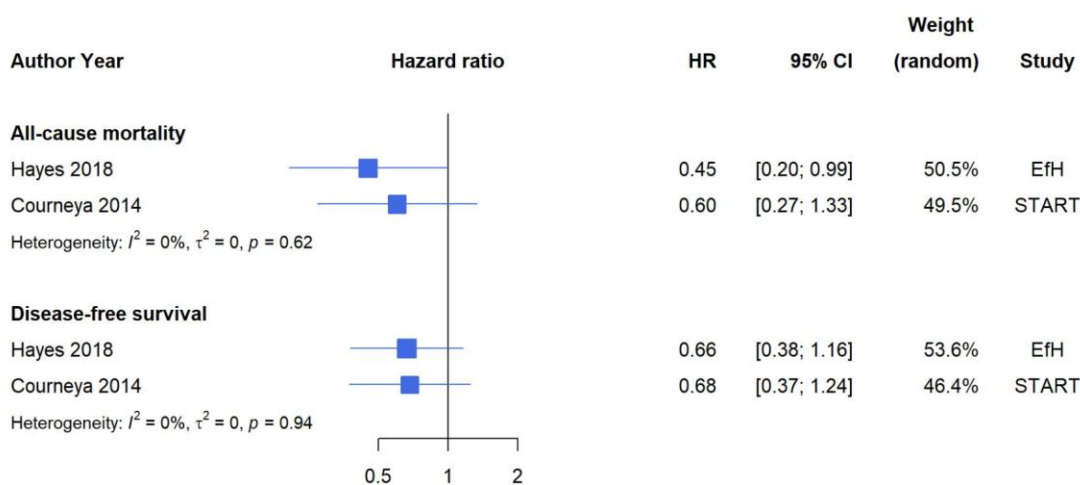

**Supplementary Figure 3** Funnel plot of studies included in the dose-response analysis for recreational physical activity and all-cause mortality. Horizontal axis shows logit transformed hazard ratios and the standard error of the logit transformed hazard ratios is plotted on the vertical axis. Each dot represents an individual study, and the vertical line represents the summary hazard ratio from a random-effects meta-analysis. The diagonal lines represent pseudo 95% confidence limits ( $p=0.01$ , Egger's test).

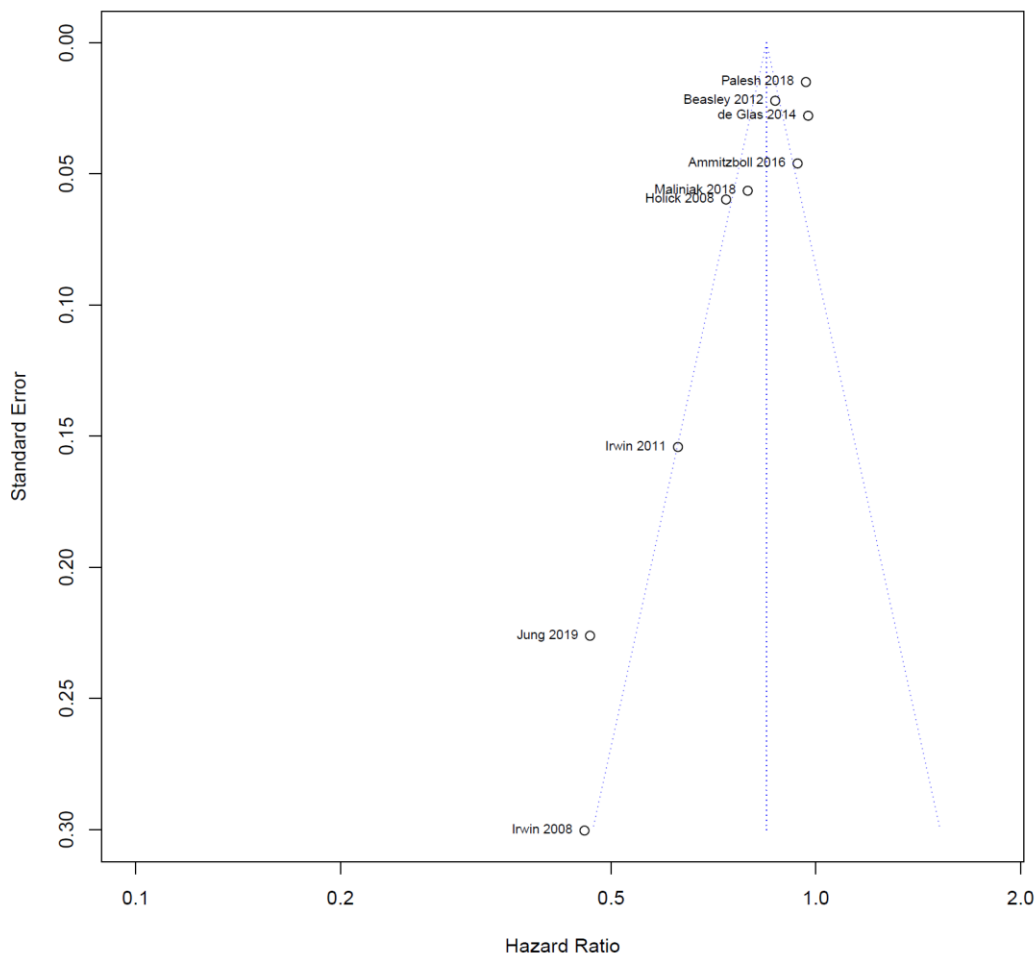

**Supplementary Figure 4** Funnel plot of studies included in the high versus low analysis for recreational physical activity and all-cause mortality. Horizontal axis shows logit transformed hazard ratios and the standard error of the logit transformed hazard ratios is plotted on the vertical axis. Each dot represents an individual study, and the vertical line represents the summary hazard ratio from a random-effects meta-analysis. The diagonal lines represent pseudo 95% confidence limits ( $p=0.34$ , Egger's test).



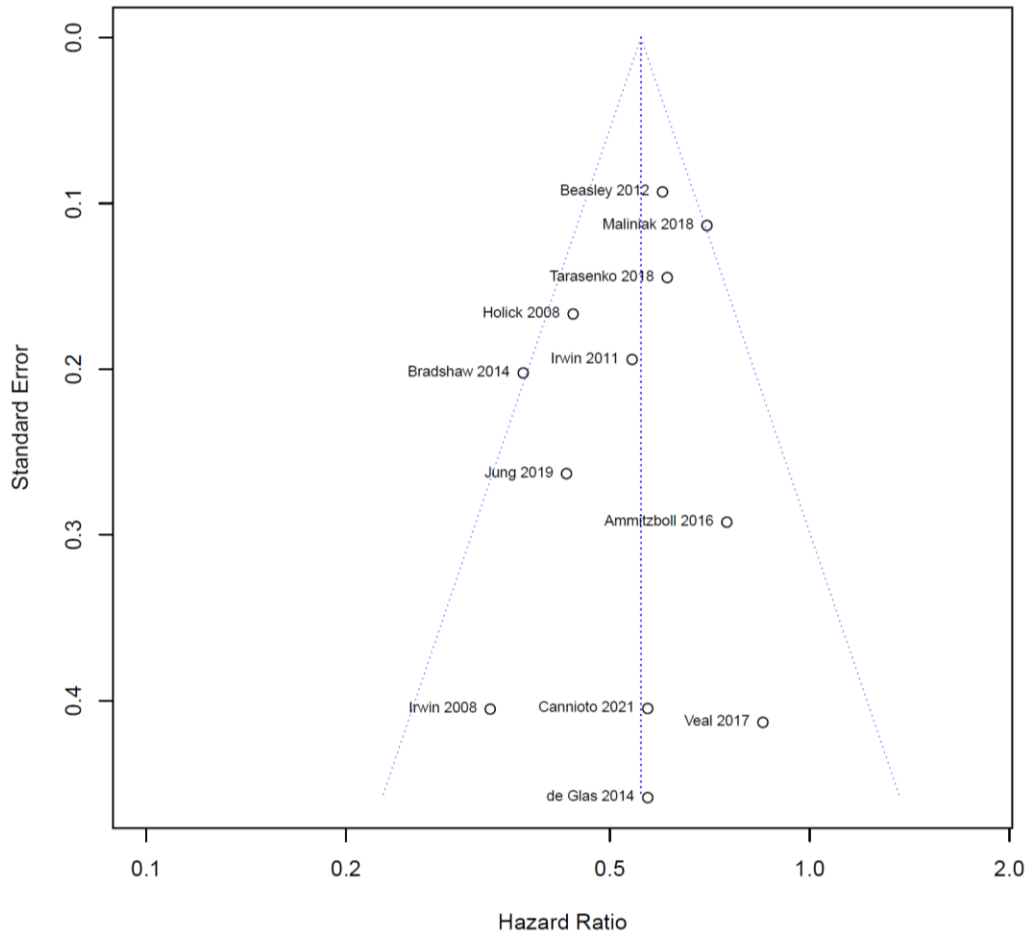

**Supplementary Figure 5 Sensitivity (leave-one-out) analysis for (A) high versus low recreational physical activity and all-cause mortality and (B) dose-response meta-analysis for all-cause mortality** Diamond represents the summary hazard ratio of the original meta-analysis with the nine publications. Each square represents the hazard ratio estimate when each indicated study is removed and the horizontal line across each square represents the 95% confidence interval (CI) of the hazard ratio estimate.

**(A)**

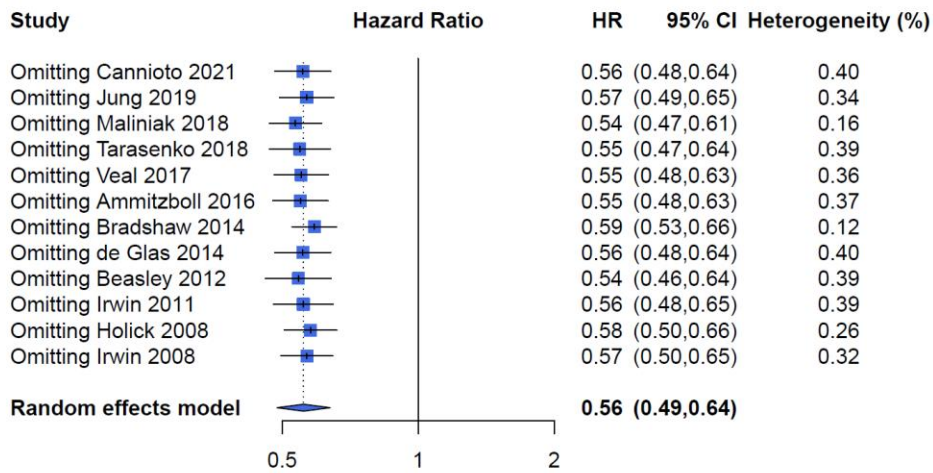

**(B)**

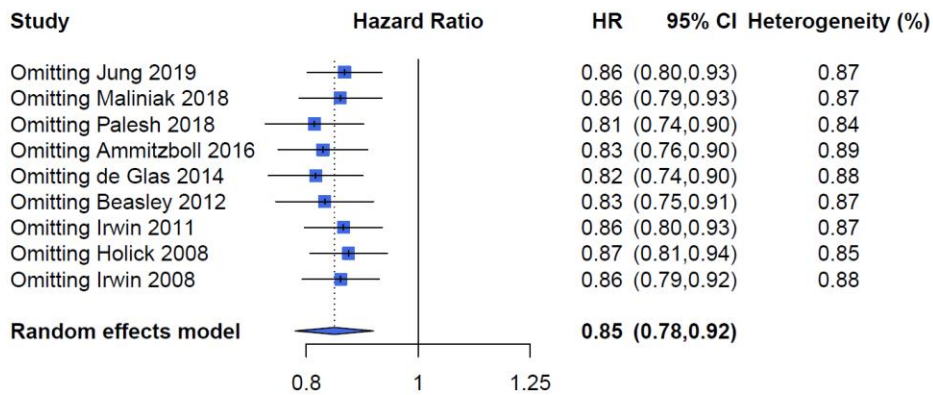

**Supplementary Figure 6 Summary hazard ratio estimate (95% CI) of all-cause mortality for 10 MET-h/week of recreational physical activity after diagnosis in women with hormone receptor positive tumours.** Note: ABCPP (Nechuta) included data from three US cohort studies i.e., LACE, NHS, WHEL.

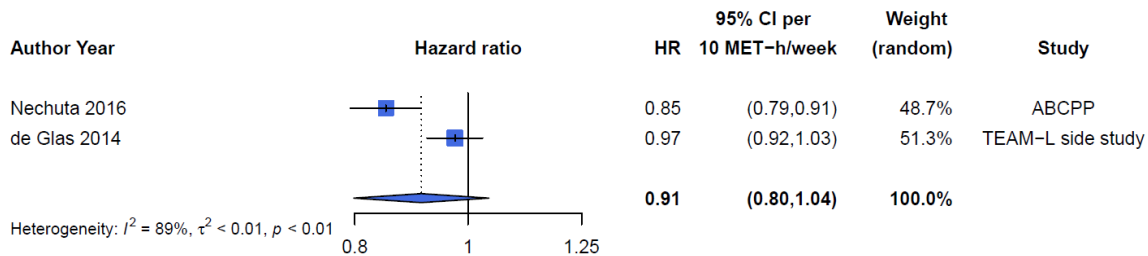

**Supplementary Figure 7 Summary hazard ratio estimate (95% CI) of all-cause cancer mortality for the highest compared with the lowest level of recreational physical activity after diagnosis, by hormone receptor status.** Note: ABCPP (Nechuta) included data from three US cohort studies i.e., LACE, NHS, WHEL.

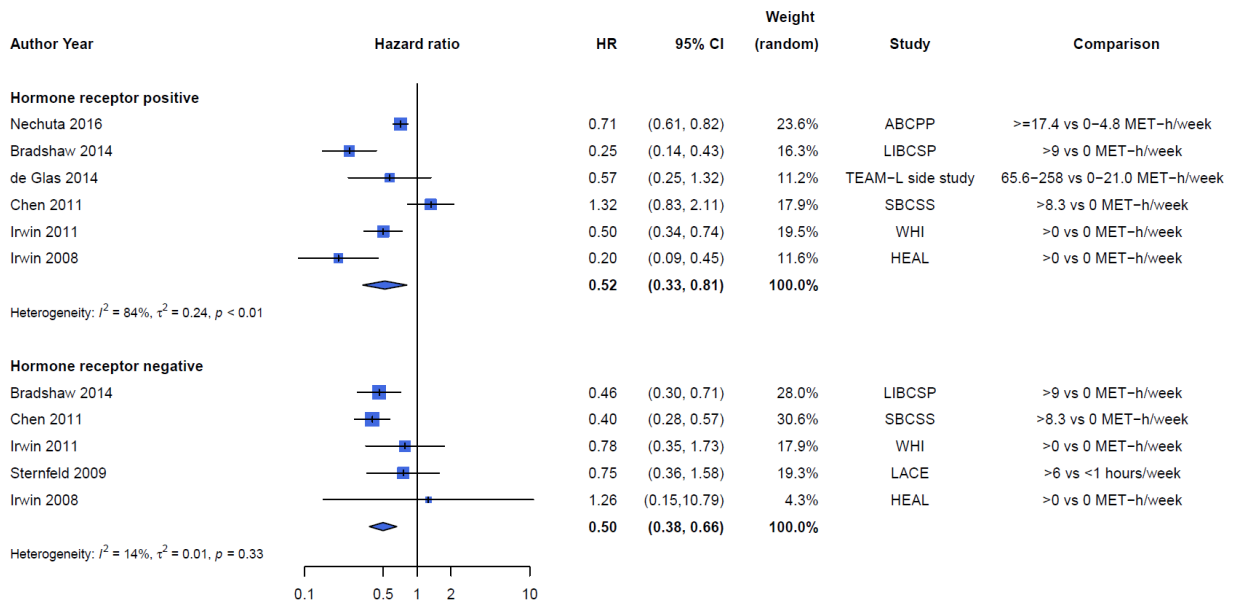

**Supplementary Figure 8 Summary hazard ratio estimate (95% CI) of all-cause mortality for 10 MET-h/week of recreational physical activity after diagnosis, by menopausal status.**

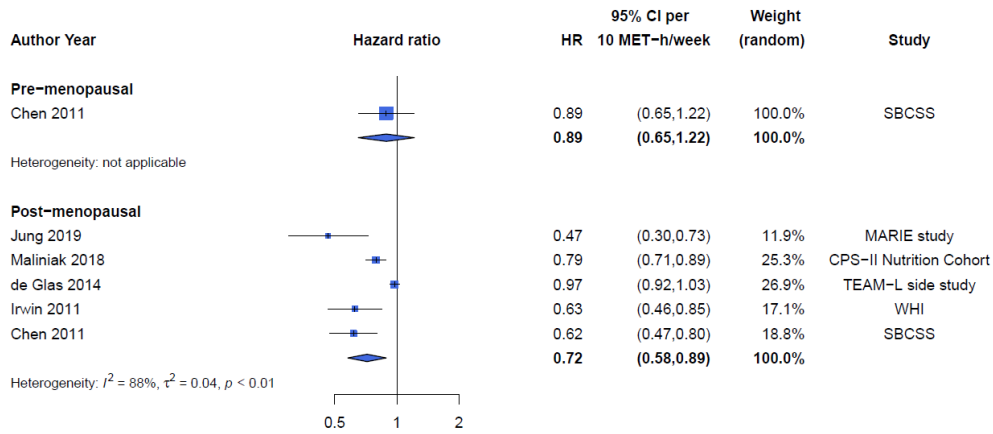

**Supplementary Figure 9 Summary hazard ratio estimate (95% CI) of all-cause mortality for the highest compared with the lowest level of recreational physical activity after diagnosis, by menopausal status.**

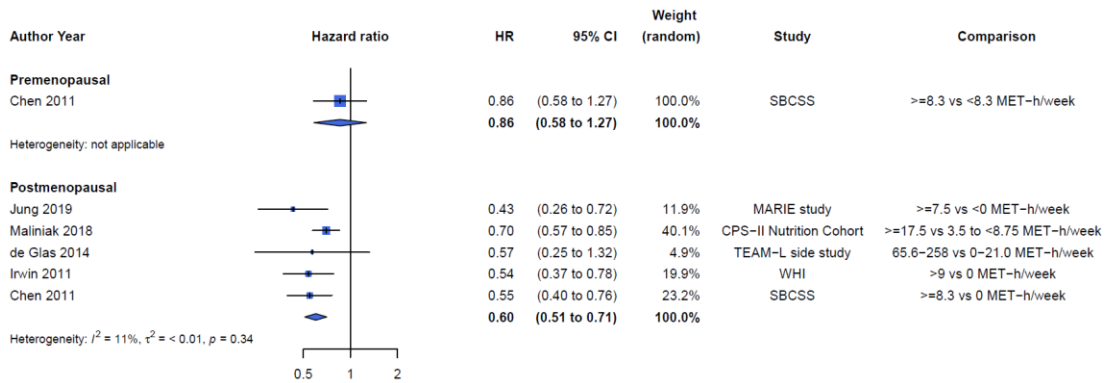

**Supplementary Figure 10 Summary hazard ratio estimate (95% CI) of all-cause mortality for the highest compared with the lowest level of recreational physical activity after diagnosis, by BMI subgroup.**

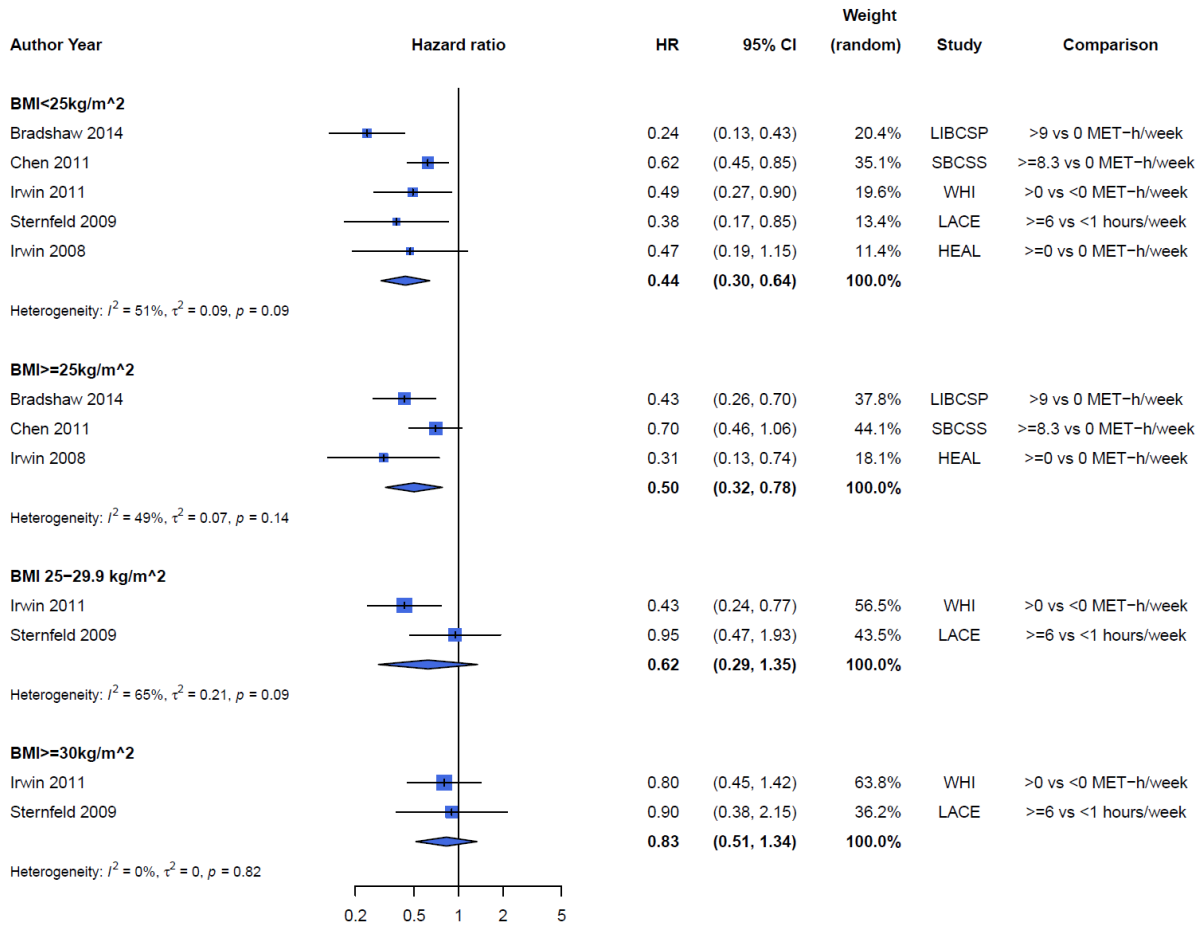

**Supplementary Figure 11 Summary hazard ratio estimate (95% CI) of all-cause mortality for the highest compared with the lowest level of moderate and vigorous physical activity after diagnosis.**

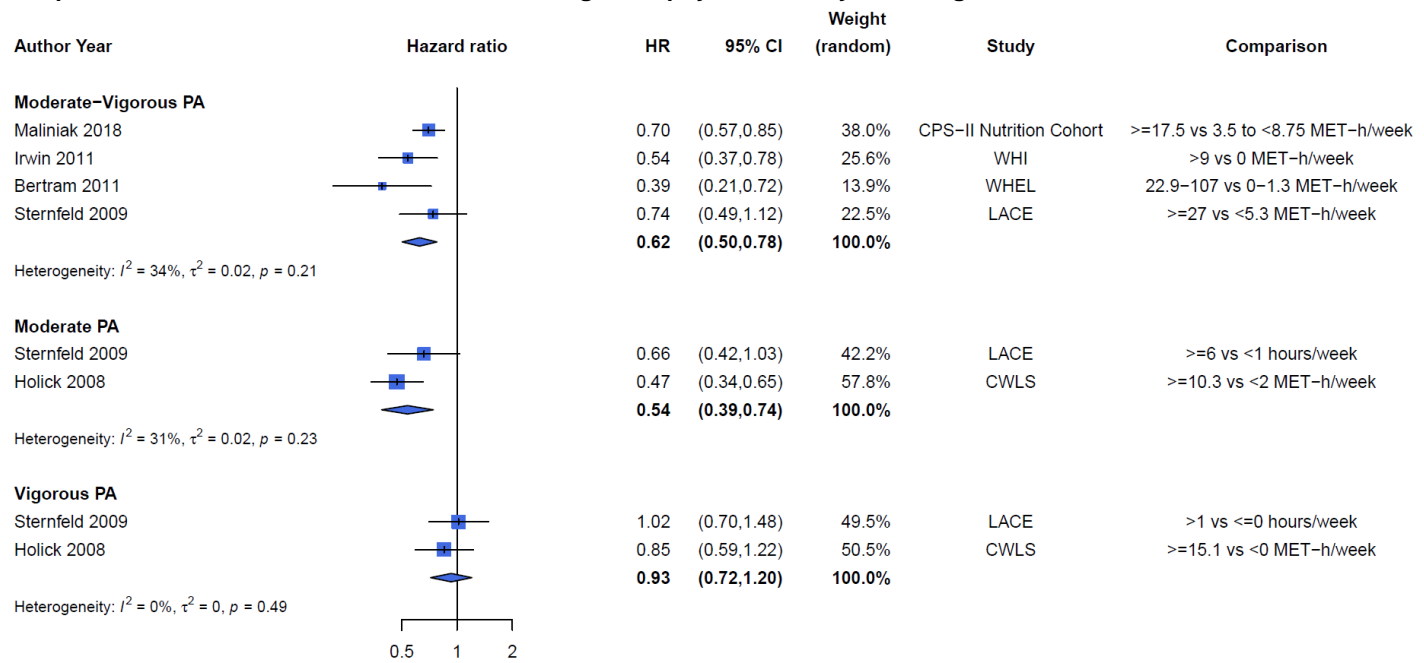

**Supplementary Figure 12 Summary hazard ratio estimate (95% CI) of (A) all-cause mortality for 10 MET-h/week of recreational physical activity, in analysis restricted to studies that collected information after the primary treatment for cancer was finished and (B) summary hazard ratio estimate (95% CI) of all-cause mortality for the highest compared with the lowest level of recreational physical activity, in analysis restricted to studies that collected information after the primary treatment for cancer was finished.**

(A)

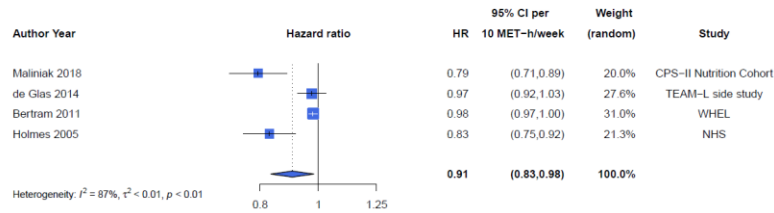

(B)

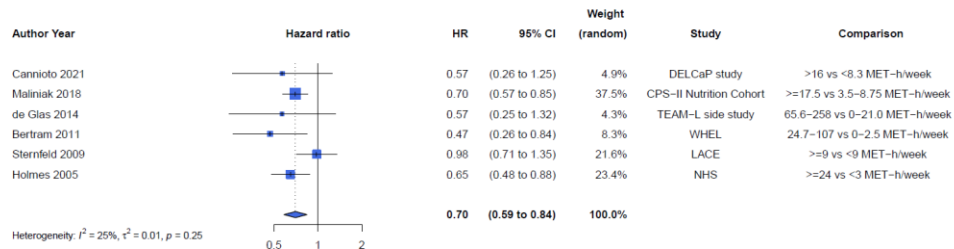

**Supplementary Figure 13 Funnel plot of studies included in the high versus low meta-analysis for recreational physical activity and breast cancer-specific mortality.** Horizontal axis shows logit transformed hazard ratios and the standard error of the logit transformed hazard ratios is plotted on the vertical axis. Each dot represents an individual study, and the vertical line represents the summary hazard ratio from a random-effects meta-analysis. The diagonal lines represent pseudo 95% confidence limits ( $p=0.11$ , Egger's test).

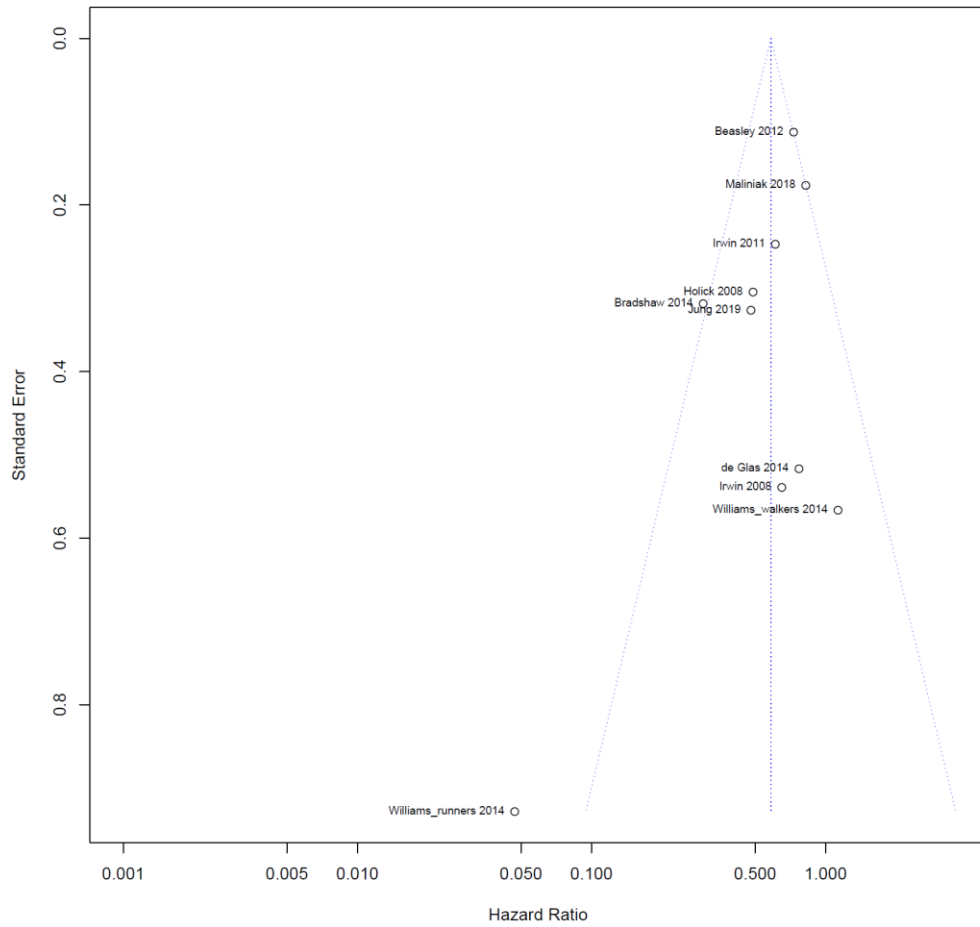



**Supplementary Figure 14 Sensitivity (leave-one-out) analysis for (A) high versus low recreational physical activity and all-cause mortality and (B) dose-response meta-analysis for breast cancer-specific mortality**  
 Diamond represents the summary hazard ratio of the original meta-analysis with the nine publications. Each square represents the hazard ratio estimate when each indicated study is removed and the horizontal line across each square represents the 95% confidence interval (CI) of the hazard ratio estimate.

(A)

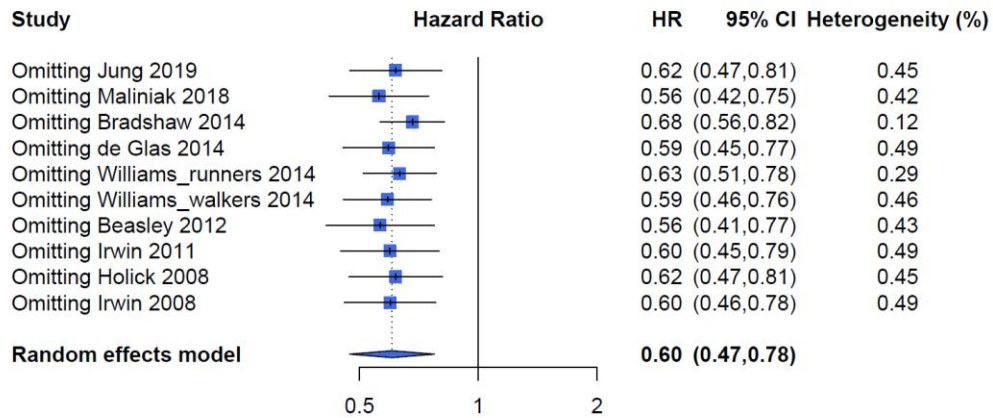

(B)

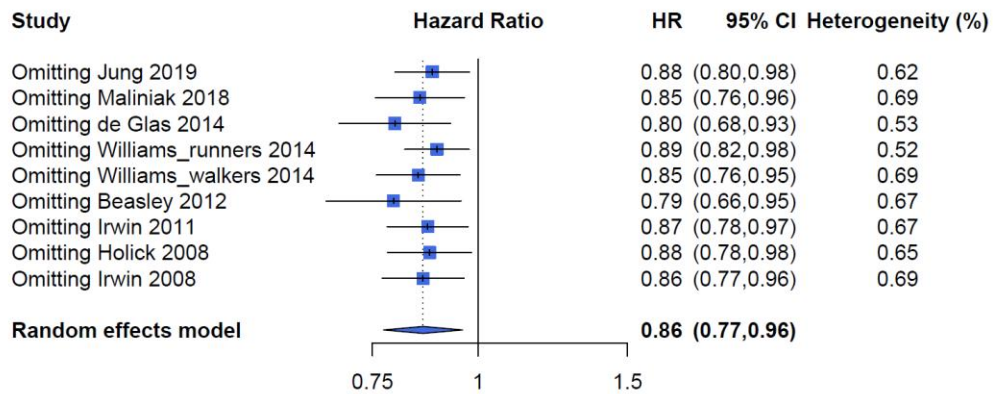

**Supplementary Figure 15 Summary hazard ratio estimate (95% CI) of breast cancer-specific mortality for 10 MET-h/week of recreational physical activity after diagnosis, by menopausal status.**

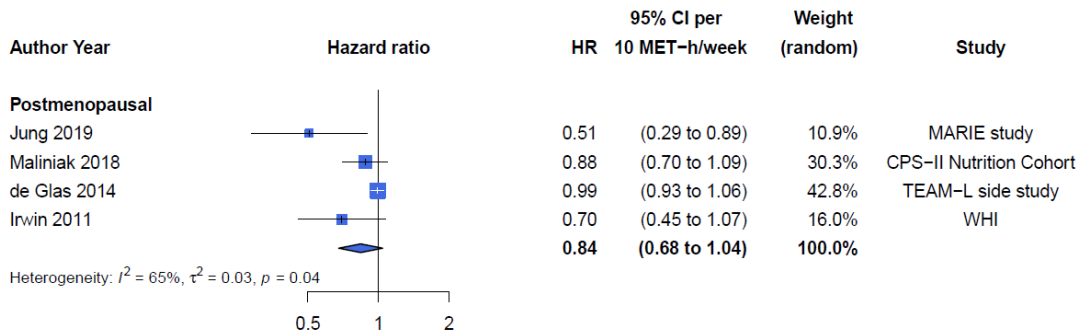

**Supplementary Figure 16 Summary hazard ratio estimate (95% CI) of breast cancer-specific mortality for the highest compared with the lowest level of recreational physical activity after diagnosis, by menopausal status.**

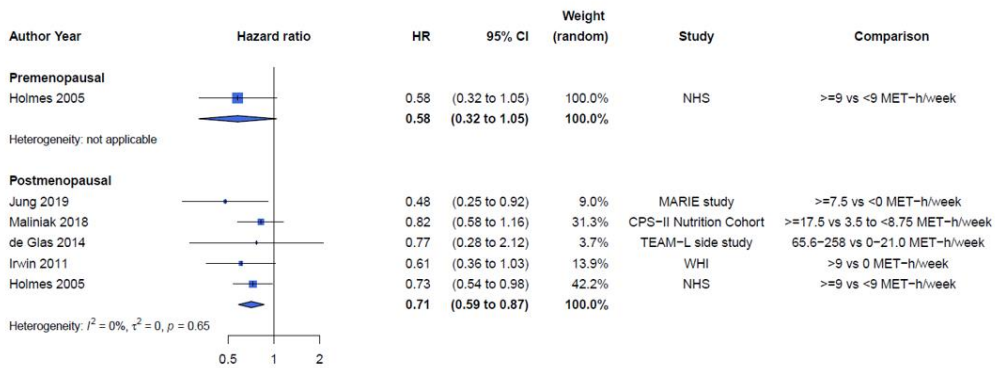

**Supplementary Figure 17 Summary hazard ratio estimate (95% CI) of breast cancer-specific mortality for the highest compared with the lowest level of recreational physical activity after diagnosis, by BMI subgroup.**

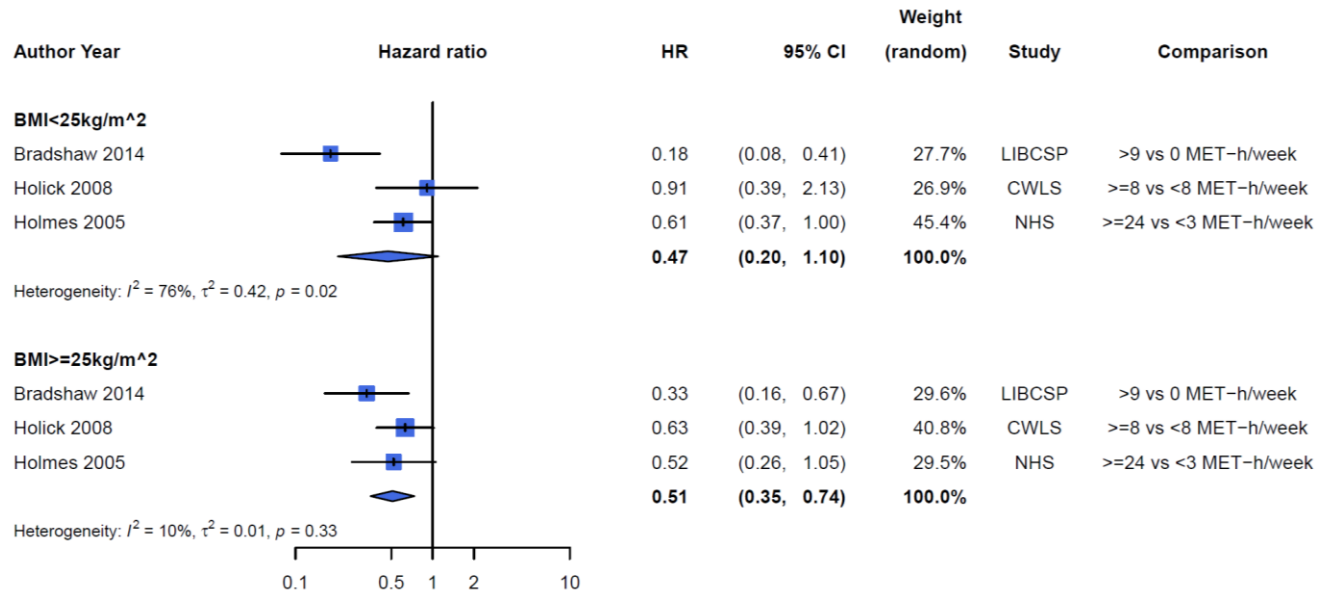

**Supplementary Figure 18 Summary hazard ratio estimate (95% CI) of breast cancer-specific mortality for the highest compared with the lowest level of moderate and vigorous physical activity after diagnosis.**

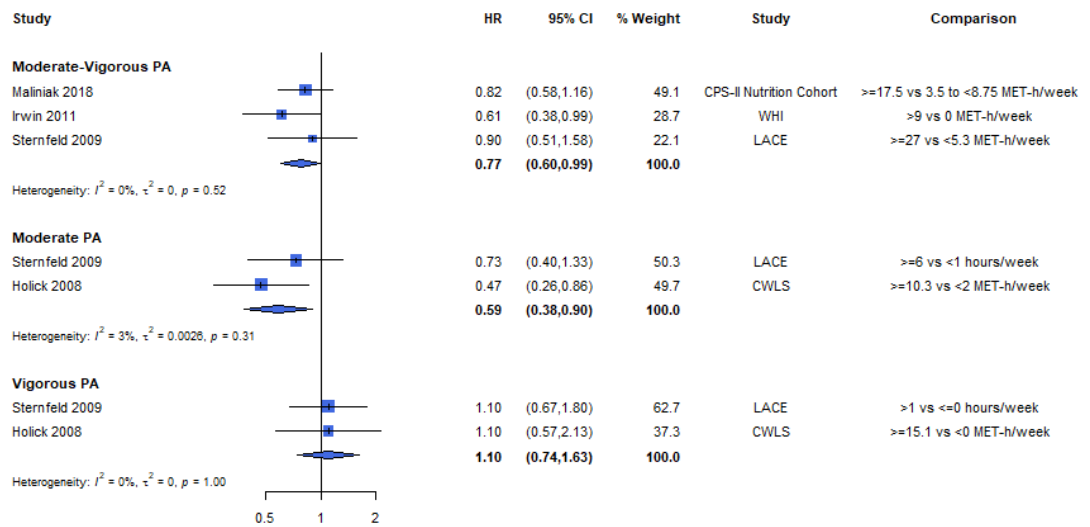

**Supplementary Figure 19 Summary hazard ratio estimate (95% CI) of (A) breast cancer-specific mortality for 10 MET-h/week of recreational physical activity, in analysis restricted to studies that collected information after the primary treatment for cancer was finished and (B) summary hazard ratio estimate (95% CI) of breast cancer mortality for the highest compared with the lowest level of recreational physical activity, in analysis restricted to studies that collected information after the primary treatment for cancer was finished.**

(A)

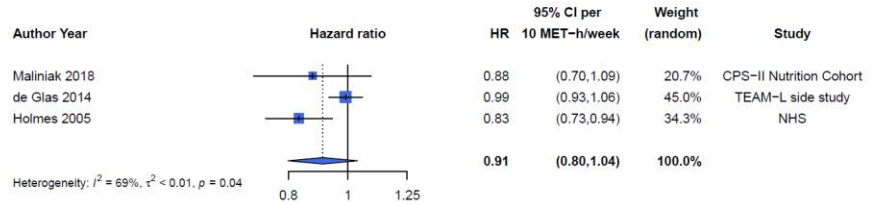

(B)

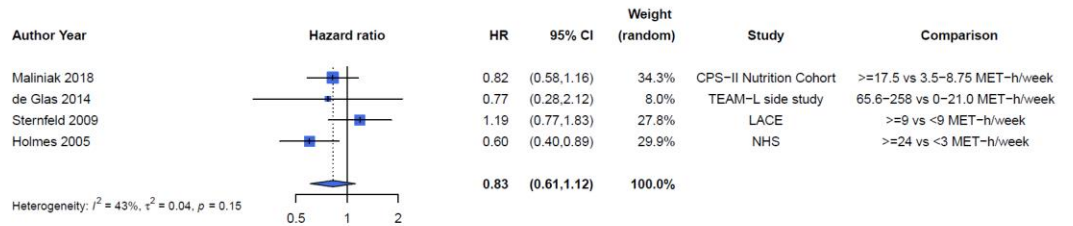

## **APPENDIX 2**

### **Details for physical activity estimations for dose-response analyses**

The median or mean physical activity level in each category was assigned to the corresponding HR for each study. If studies reported the range of physical activity levels, we used the midpoint for each category. If the highest or lowest category was open-ended, we assumed its width to be the same as the adjacent category. If studies reported only categorical results, number of events and denominator data (person-years of follow-up or total number of persons) were required for inclusion in the meta-analysis for at least three categories of physical activity. When only the total number of events or person years was reported, and physical activity was categorised in quantiles, the distribution of persons or person years was calculated by dividing the total number of persons or person years by the number of quantiles.

## **APPENDIX 3**

### **Physical activity changes from before to after diagnosis and breast cancer prognosis Physical activity change from before diagnosis to after diagnosis and all-cause mortality**

Seven studies<sup>1-7</sup> examining changes in physical activity before and after breast cancer diagnosis in relation to all-cause mortality were identified. In general, there is a tendency for better survival in women who increase post-diagnosis physical activity and worse survival in women with reduced post-diagnosis physical activity although the studies are limited by small sample sizes.

In the HEAL study,<sup>5</sup> null associations were observed for women who increased physical activity in the second year after diagnosis by 3 MET-h/week or more (HR=0.55, 95%CI 0.22-1.38; deaths=7), as well as for those who maintained physical activity levels within 3 MET-h/week (HR=1.55, 95%CI 0.64-3.80; deaths=11). Women who decreased physical activity after diagnosis by more than 3 MET-h/week had higher risk of death (HR=3.95, 95%CI 1.45-10.50, deaths=19) compared with women who were inactive both before and after diagnosis (0 MET-h/week). The results were similar after excluding 24 women who had an adverse event (recurrence, new primary, or death) within the two years after completing the post diagnosis physical activity questionnaire.

In the WHI study,<sup>4</sup> physical activity was assessed before diagnosis and at the third and sixth year of follow-up. Post-diagnosis physical activity was the closest assessment after diagnosis during follow-up. Women who increased or maintained physical activity of nine or more MET-h/week after diagnosis had lower risk of all-cause mortality (HR=0.67, 95%CI, 0.46–0.96, deaths=69) than women who were inactive before and after diagnosis (none or <9 MET-h/week before and close after diagnosis; deaths=46). No change in risk of all-cause mortality was observed in women who decreased physical activity (HR decrease compared to no change 1.06, 95%CI 0.73–1.54, deaths=53).

In the WHEL study,<sup>1</sup> four categories for change in physical activity were defined according to following a guideline of 10 MET-h/week before and one year after diagnosis. The association of women who never met the guideline compared to those who were meeting physical activity guidelines both at baseline and at one-year follow-up was null (HR=0.89, 95%CI 0.49-1.64). No reduction in risk of all-cause mortality was observed in women who were meeting physical activity guidelines at only a single time point (either before or after cancer diagnosis).

In the DCH study,<sup>2</sup> the influence of post-diagnosis physical activity on all-cause mortality was not modified by pre-diagnosis physical activity. In NOWAC,<sup>3</sup> women who reduced physical activity levels had higher risk of all-cause mortality (HR=1.76, 95%CI 1.21–2.56) than those women who maintained their constant activity level.

In the MARIE study,<sup>6</sup> women who were increasingly active compared to those who were insufficiently active had a higher risk of all-cause mortality (HR=0.50, 95% CI 0.31–0.82). A similar pattern to all-cause mortality was observed for breast cancer-specific mortality and recurrence but the 95%CI crossed the null value. In the publication by Akdeniz et al 2021<sup>7</sup> no associations were observed for all-cause mortality and physical activity changes, the 95%CI crossed the null value in multivariate analyses.

### **Physical activity change from before diagnosis to after diagnosis and breast cancer-specific mortality**

Four studies examining changes in physical activity before and after breast cancer diagnosis in relation to breast cancer mortality were identified. In HEAL<sup>5</sup>, no change in risk of breast cancer-specific mortality was observed in women who increased physical activity in the second year after diagnosis in 3 MET-h/week, compared to women who were inactive both before and after diagnosis (0 MET-h/week) (HR=0.82, 95%CI 0.29-2.34; deaths=6). The association was also null for women who either maintained (within 3 MET-h/week) or decreased their physical activity levels (by more than 3 MET-h/week) after diagnosis (HR=2.47, 95%CI 0.78-7.78; deaths=7 and HR=3.69, 95%CI 0.88-15.92, deaths=7, respectively).

In the WHI study<sup>4</sup>, compared to women with no physical activity change after diagnosis, no significant changes in breast cancer risks were observed in women who increased or maintained physical activity of 9 or more MET-h/week (HR=0.91, 95% CI, 0.51-1.64, deaths=32) or decreased physical activity from >9 to <9 MET-h/week or to no activity (HR=1.06, 95%CI 0.59–1.88, deaths=22). In NOWAC<sup>3</sup>, women who reduced physical activity levels had higher risk of all-cause mortality (HR=2.05, 95%CI 1.35-3.10) than women who maintained their constant activity level.

In the MARIE study<sup>6</sup> a similar pattern to all-cause mortality was observed for increasing levels of physical activity and breast cancer-specific mortality but the 95%CI crossed the null value.

### **Physical activity change from before diagnosis to after diagnosis and breast cancer recurrence**

Three studies (WHEL, MARIE study, publication by Akdeniz 2021) examining changes in physical activity before and after breast cancer diagnosis in relation to additional breast cancer events was identified. In this study,<sup>1</sup> women who never met the guideline of 10 MET-h/week either before or after diagnosis, did not have a lower risk of additional breast cancer events compared to women who met physical activity guidelines both before and at one year after diagnosis (HR=0.93, 95%CI

0.70-1.24, events=103 events). Higher risk of additional breast cancer events was observed in women who were meeting physical activity guidelines only after diagnosis (HR=1.44, 95%CI 1.02-2.03, events=49) but the association was null for those who met physical activity guidelines only before cancer diagnosis (HR=1.22, 95%CI 0.81-1.83, events=31).

In the MARIE study<sup>6</sup> a similar pattern to all-cause mortality was observed for increasing levels of physical activity and breast cancer-specific mortality but the 95%CI crossed the null value. In the publication by Akdeniz et al 2021<sup>7</sup> patients who started exercising after breast cancer diagnosis had lower risk of disease-free survival compared to those who did not do any exercise (HR=0.13, 95% CI 0.04–0.44,  $p=0.001$ ).

## REFERENCE LIST

1. Bertram LA, Stefanick ML, Saquib N, *et al*. Physical activity, additional breast cancer events, and mortality among early-stage breast cancer survivors: findings from the WHEL Study. *Cancer Causes Control* 2011;22(3):427-35.
2. Ammitzboll G, Sogaard K, Karlsen RV, *et al*. Physical activity and survival in breast cancer. *Eur J Cancer* 2016;66:67-74.
3. Borch KB, Braaten T, Lund E, *et al*. Physical activity before and after breast cancer diagnosis and survival - the Norwegian women and cancer cohort study. *BMC Cancer* 2015;15:967.
4. Irwin ML, McTiernan A, Manson JE, *et al*. Physical activity and survival in postmenopausal women with breast cancer: results from the women's health initiative. *Cancer Prev Res (Phila)* 2011;4(4):522-9.
5. Irwin ML, Smith AW, McTiernan A, *et al*. Influence of pre- and postdiagnosis physical activity on mortality in breast cancer survivors: the health, eating, activity, and lifestyle study. *J Clin Oncol* 2008;26(24):3958-64.
6. Jung AY, Behrens S, Schmidt M, *et al*. Pre- to postdiagnosis leisure-time physical activity and prognosis in postmenopausal breast cancer survivors. *Breast Cancer Res* 2019;21(1):117.
7. Akdeniz N, Kaplan MA, Küçüköner M, *et al*. The effect of exercise on disease-free survival and overall survival in patients with breast cancer. *Ir J Med Sci* 2021.
